# Supplementary material for: Identification of Putative Transmembrane Proteins Involved in Salinity Tolerance in Chenopodium quinoa by Integrating Physiological Data, RNAseq, and SNP Analyses
Source: PubMed Central journal article supplement (PMC5478719; doi:10.3389/fpls.2017.01023), 2017-06-21
Supplement: Image2.pdf [file Image2.pdf]

A

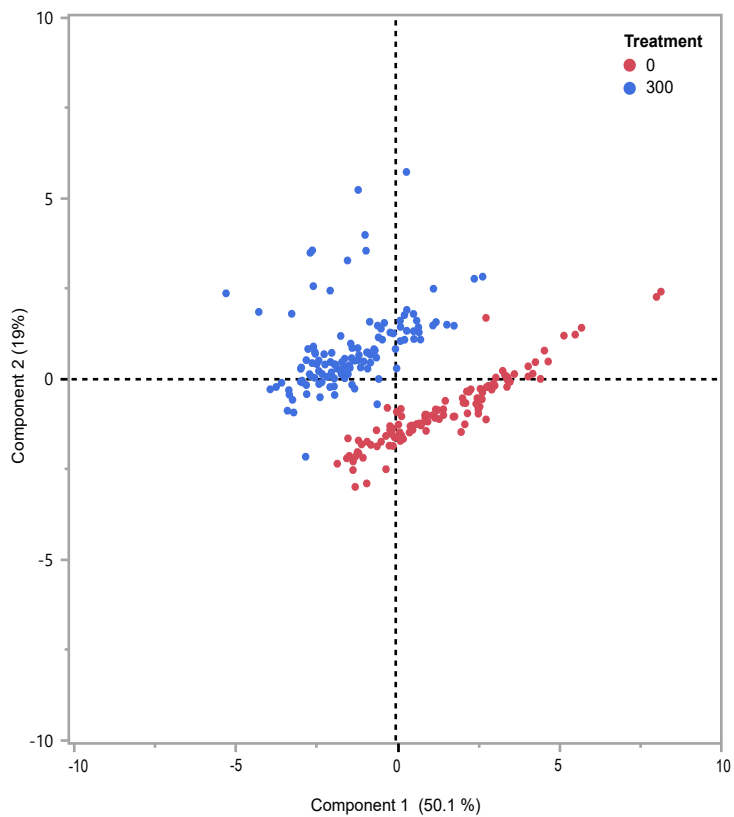

B

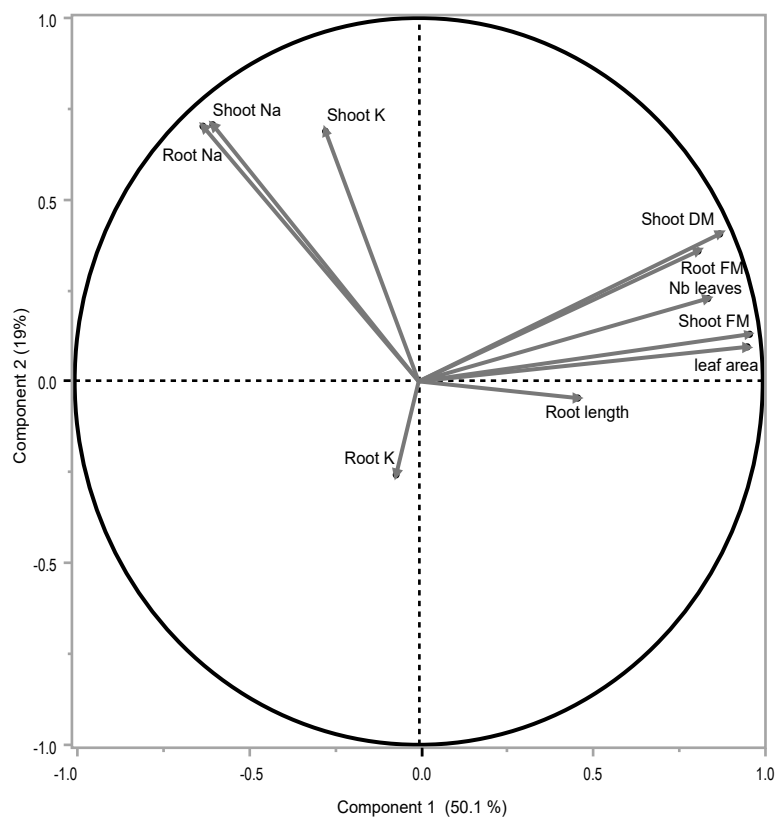

**Supplementary Figure S2:** Principal component analysis for traits hypothesized to contribute to salinity tolerance. (A) Scatter plot of PCA analysis with control (red) and salt treated (blue) *Chenopodium* accessions. Plotted points represent the average value for each measured trait for each accession. (B) Arrows indicate PCA analysis for traits indicated. All statistical analyses were performed in JMP.
