# Supplementary material for: Identification of Putative Transmembrane Proteins Involved in Salinity Tolerance in Chenopodium quinoa by Integrating Physiological Data, RNAseq, and SNP Analyses
Source: Front Plant Sci. 2017 Jun 21;8:1023. doi: 10.3389/fpls.2017.01023 (PMC5478719; doi:10.3389/fpls.2017.01023)
Supplement: Supplementary file 1 [file DataSheet1.XLSX]

## Sheet: Sheet1
Gene ID	TM domains	OrthoMCL location	Cluster number	Expression - response to salt	Overrepresented	Annotation	Root expression control (FPKM)	Root expression salt (FPKM)	Shoot expression control (FPKM)	Shoot expression salt (FPKM)
AUR62000001	0	Has Orthologs	Cluster 5193	Shoot Up		SimilarPPH: Pheophytinase%2C chloroplastic (Arabidopsis thaliana)			7.01626	13.6552
AUR62000002	1	Has Orthologs	Cluster 1678	Shoot Down		Protein of unknown function			21.2281	11.7872
AUR62000003	0	Singleton	N/A			SimilarUMK3: UMP-CMP kinase 3 (Arabidopsis thaliana)
AUR62000004	0	Has Orthologs	Cluster 13148			SimilarEIL5: ETHYLENE INSENSITIVE 3-like 5 protein (Arabidopsis thaliana)
AUR62000005	1	Has Orthologs	Cluster 1801	Shoot Up		SimilarvanA: Vanillate O-demethylase oxygenase subunit (Pseudomonas sp. (strain ATCC 19151))			2.7462	6.64756
AUR62000006	0	Has Orthologs	Cluster 1801	Shoot Up		SimilarPTC52: Protochlorophyllide-dependent translocon component 52%2C chloroplastic (Arabidopsis thaliana)			15.9922	29.2441
AUR62000007	2	Has Orthologs	Cluster 5194			SimilarSD31: G-type lectin S-receptor-like serine/threonine-protein kinase SD3-1 (Arabidopsis thaliana)
AUR62000008	0	Has Orthologs	Cluster 5195			SimilarIQM6: IQ domain-containing protein IQM6 (Arabidopsis thaliana)
AUR62000009	3	Has Orthologs	Cluster 4164	Shoot Up	Quinoa Overrepresented	SimilarARASP: Membrane metalloprotease ARASP%2C chloroplastic (Arabidopsis thaliana)			31.9406	46.4621
AUR62000010	0	Has Orthologs	Cluster 13149			SimilarAt3g13560: Glucan endo-1%2C3-beta-glucosidase 4 (Arabidopsis thaliana)
AUR62000011	0	Has Orthologs	Cluster 15142			SimilarCOP10: Constitutive photomorphogenesis protein 10 (Arabidopsis thaliana)
AUR62000012	0	Has Orthologs	Cluster 2889		Quinoa Overrepresented	SimilarF6'H1: Feruloyl CoA ortho-hydroxylase 1 (Arabidopsis thaliana)
AUR62000013	0	Has Orthologs	Cluster 5196			SimilarNRPB8B: DNA-directed RNA polymerases II%2C IV and V subunit 8B (Arabidopsis thaliana)
AUR62000014	11	Has Orthologs	Cluster 1593			SimilarAt3g13620: Probable polyamine transporter At3g13620 (Arabidopsis thaliana)
AUR62000015	10	Has Orthologs	Cluster 1593			SimilarAt3g13620: Probable polyamine transporter At3g13620 (Arabidopsis thaliana)
AUR62000016	0	Has Orthologs	Cluster 4165		Quinoa Overrepresented	SimilarcrtM: Dehydrosqualene synthase (Staphylococcus haemolyticus (strain JCSC1435))
AUR62000017	0	Has Orthologs	Cluster 5197			SimilarPSY2: Phytoene synthase 2%2C chloroplastic (Fragment) (Solanum lycopersicum)
AUR62000018	0	Has Orthologs	Cluster 1807			SimilarSerine/threonine-protein phosphatase PP2A catalytic subunit (Nicotiana tabacum)
AUR62000019	0	Has Orthologs	Cluster 1859			SimilarAt1g55270: F-box/kelch-repeat protein At1g55270 (Arabidopsis thaliana)
AUR62000020	0	Has Orthologs	Cluster 13150			SimilarAt5g01610: Uncharacterized protein At5g01610 (Arabidopsis thaliana)
AUR62000021	0	Has Orthologs	Cluster 13151			Protein of unknown function
AUR62000022	0	Has Orthologs	Cluster 5198			SimilarYLS3: Protein YLS3 (Arabidopsis thaliana)
AUR62000023	10	Has Orthologs	Cluster 5199			SimilarPigv: GPI mannosyltransferase 2 (Rattus norvegicus)
AUR62000024	0	Has Orthologs	Cluster 5200			Similarsf1: Branchpoint-bridging protein (Dictyostelium discoideum)
AUR62000025	0	Singleton	N/A			Protein of unknown function
AUR62000026	0	Singleton	N/A			SimilarPGIP1: Polygalacturonase inhibitor 1 (Arabidopsis thaliana)
AUR62000027	0	Quinoa Specific	Cluster 16211		Quinoa Overrepresented	SimilarPME46: Probable pectinesterase/pectinesterase inhibitor 46 (Arabidopsis thaliana)
AUR62000028	3	Singleton	N/A			Protein of unknown function
AUR62000029	2	Singleton	N/A			Protein of unknown function
AUR62000030	1	Has Orthologs	Cluster 5201			Protein of unknown function
AUR62000031	0	Singleton	N/A			SimilarDIR19: Dirigent protein 19 (Arabidopsis thaliana)
AUR62000032	0	Has Orthologs	Cluster 13152	Shoot Down		Protein of unknown function			65.5408	36.6536
AUR62000033	0	Has Orthologs	Cluster 1073	Shoot Down	Quinoa Overrepresented	SimilarTMK4: Receptor-like kinase TMK4 (Arabidopsis thaliana)			7.0099	4.77183
AUR62000034	3	Has Orthologs	Cluster 11546			Protein of unknown function
AUR62000035	0	Has Orthologs	Cluster 1275			SimilarDMT105: DNA (cytosine-5)-methyltransferase 3 (Zea mays)
AUR62000036	0	Has Orthologs	Cluster 1178		Quinoa Overrepresented (with Beet)	Similarcki2: Casein kinase I homolog 2 (Schizosaccharomyces pombe (strain 972 / ATCC 24843))
AUR62000037	0	Has Orthologs	Cluster 5202	Shoot Up		SimilarEDA3: Protein EMBRYO SAC DEVELOPMENT ARREST 3%2C chloroplastic (Arabidopsis thaliana)			67.4102	91.4141
AUR62000038	5	Has Orthologs	Cluster 1697			SimilarMTP4: Metal tolerance protein 4 (Oryza sativa subsp. japonica)
AUR62000039	0	Has Orthologs	Cluster 5203			SimilarFormate--tetrahydrofolate ligase (Spinacia oleracea)
AUR62000040	0	Has Orthologs	Cluster 2117			SimilarTBR: Protein trichome birefringence (Arabidopsis thaliana)
AUR62000041	0	Has Orthologs	Cluster 11547			SimilarHRPN: Peroxidase N (Armoracia rusticana)
AUR62000042	0	Has Orthologs	Cluster 5204	Shoot Up		SimilarPAP12: Probable plastid-lipid-associated protein 12%2C chloroplastic (Arabidopsis thaliana)			16.8459	29.2126
AUR62000043	0	Has Orthologs	Cluster 5205			Protein of unknown function
AUR62000044	14	Has Orthologs	Cluster 1067			SimilarCALS9: Callose synthase 9 (Arabidopsis thaliana)
AUR62000045	13	Has Orthologs	Cluster 1067			SimilarCALS3: Callose synthase 3 (Arabidopsis thaliana)
AUR62000046	0	Singleton	N/A			SimilarCALS3: Callose synthase 3 (Arabidopsis thaliana)
AUR62000047	0	Has Orthologs	Cluster 5206			SimilarOs02g0194200: Zinc finger CCCH domain-containing protein 14 (Oryza sativa subsp. japonica)
AUR62000048	0	Has Orthologs	Cluster 3998			SimilarNSE4A: Non-structural maintenance of chromosomes element 4 homolog A (Arabidopsis thaliana)
AUR62000049	0	Singleton	N/A			Protein of unknown function
AUR62000050	0	Has Orthologs	Cluster 5207			SimilarGTE12: Transcription factor GTE12 (Arabidopsis thaliana)
AUR62000051	0	Has Orthologs	Cluster 5208			Protein of unknown function
AUR62000052	0	Has Orthologs	Cluster 5209			SimilarEML3: Protein EMSY-LIKE 3 (Arabidopsis thaliana)
AUR62000053	0	Has Orthologs	Cluster 5210	Shoot Up		SimilarAZOSEA38000: UPF0061 protein AZOSEA38000 (Aromatoleum aromaticum (strain EbN1))			21.3105	33.4825
AUR62000054	0	Has Orthologs	Cluster 1032		Quinoa Overrepresented	SimilarAt1g11305: G-type lectin S-receptor-like serine/threonine-protein kinase At1g11305 (Arabidopsis thaliana)
AUR62000055	1	Has Orthologs	Cluster 1032		Quinoa Overrepresented	SimilarLECRK56: Putative L-type lectin-domain containing receptor kinase V.6 (Arabidopsis thaliana)
AUR62000056	1	Has Orthologs	Cluster 11548			SimilarLEP: Ethylene-responsive transcription factor LEP (Arabidopsis thaliana)
AUR62000057	0	Has Orthologs	Cluster 5211			SimilarPCMP-E40: Pentatricopeptide repeat-containing protein At5g15300 (Arabidopsis thaliana)
AUR62000058	0	Has Orthologs	Cluster 1032		Quinoa Overrepresented	SimilarRLK1: G-type lectin S-receptor-like serine/threonine-protein kinase RLK1 (Arabidopsis thaliana)
AUR62000059	1	Has Orthologs	Cluster 1032		Quinoa Overrepresented	SimilarB120: G-type lectin S-receptor-like serine/threonine-protein kinase B120 (Arabidopsis thaliana)
AUR62000060	1	Has Orthologs	Cluster 1032		Quinoa Overrepresented	SimilarSD22: G-type lectin S-receptor-like serine/threonine-protein kinase SD2-2 (Arabidopsis thaliana)
AUR62000061	0	Has Orthologs	Cluster 1032		Quinoa Overrepresented	SimilarSELMODRAFT_444075: Inactive protein kinase SELMODRAFT_444075 (Selaginella moellendorffii)
AUR62000062	1	Has Orthologs	Cluster 1032		Quinoa Overrepresented	SimilarLECRK81: L-type lectin-domain containing receptor kinase VIII.1 (Arabidopsis thaliana)
AUR62000063	0	Singleton	N/A			Protein of unknown function
AUR62000064	1	Has Orthologs	Cluster 1032		Quinoa Overrepresented	SimilarRLK1: G-type lectin S-receptor-like serine/threonine-protein kinase RLK1 (Arabidopsis thaliana)
AUR62000065	0	Has Orthologs	Cluster 1304		Quinoa Overrepresented	SimilarBGLU24: Beta-glucosidase 24 (Oryza sativa subsp. japonica)
AUR62000066	1	Has Orthologs	Cluster 1032		Quinoa Overrepresented	SimilarAt1g34300: G-type lectin S-receptor-like serine/threonine-protein kinase At1g34300 (Arabidopsis thaliana)
AUR62000067	0	Singleton	N/A			Protein of unknown function
AUR62000068	0	Has Orthologs	Cluster 1032		Quinoa Overrepresented	SimilarSELMODRAFT_444075: Inactive protein kinase SELMODRAFT_444075 (Selaginella moellendorffii)
AUR62000069	1	Has Orthologs	Cluster 1304		Quinoa Overrepresented	SimilarBGLU2: Putative beta-glucosidase 2 (Arabidopsis thaliana)
AUR62000070	0	Has Orthologs	Cluster 1304		Quinoa Overrepresented	SimilarBGLU17: Putative beta-glucosidase 17 (Oryza sativa subsp. japonica)
AUR62000071	0	Has Orthologs	Cluster 5212			SimilarHDH: Histidinol dehydrogenase%2C chloroplastic (Oryza sativa subsp. japonica)
AUR62000072	0	Has Orthologs	Cluster 1039		Quinoa Overrepresented (with Beet)	SimilarLinoleate 11-lipoxygenase (Gaeumannomyces graminis var. avenae)
AUR62000073	0	Has Orthologs	Cluster 1039		Quinoa Overrepresented (with Beet)	SimilarLOX1.2: Seed linoleate 9S-lipoxygenase-2 (Glycine max)
AUR62000074	0	Has Orthologs	Cluster 1039		Quinoa Overrepresented (with Beet)	SimilarALOXE3: Hydroperoxide isomerase ALOXE3 (Homo sapiens)
AUR62000075	0	Has Orthologs	Cluster 1089		Quinoa Overrepresented	SimilarRetrovirus-related Pol polyprotein from transposon TNT 1-94 (Nicotiana tabacum)
AUR62000076	0	Has Orthologs	Cluster 1039	Shoot Up	Quinoa Overrepresented (with Beet)	Protein of unknown function			10.3713	26.8367
AUR62000077	0	Has Orthologs	Cluster 1039	Shoot Up	Quinoa Overrepresented (with Beet)	SimilarLOX2.1: Linoleate 13S-lipoxygenase 2-1%2C chloroplastic (Solanum tuberosum)			13.6001	203.528
AUR62000078	0	Has Orthologs	Cluster 5213			SimilarYMR315W: Uncharacterized protein YMR315W (Saccharomyces cerevisiae (strain ATCC 204508 / S288c))
AUR62000079	3	Has Orthologs	Cluster 1024		Quinoa Overrepresented	SimilarQKY: Protein QUIRKY (Arabidopsis thaliana)
AUR62000080	0	Has Orthologs	Cluster 1022		Quinoa Overrepresented	SimilarGSTT3: Glutathione S-transferase T3 (Arabidopsis thaliana)
AUR62000081	0	Has Orthologs	Cluster 2890		Quinoa Overrepresented	SimilarEIL3: ETHYLENE INSENSITIVE 3-like 3 protein (Arabidopsis thaliana)
AUR62000082	0	Has Orthologs	Cluster 4166	Root Up; Shoot Up	Quinoa Overrepresented	SimilarJMJD5: Putative lysine-specific demethylase JMJD5 (Arabidopsis thaliana)	3.63941	14.1283	6.5864	21.8779
AUR62000083	0	Quinoa Specific	Cluster 14516		Quinoa Overrepresented	SimilarIRKI: IRK-interacting protein (Arabidopsis thaliana)
AUR62000084	0	Quinoa Specific	Cluster 16212		Quinoa Overrepresented	SimilarFRS5: Protein FAR1-RELATED SEQUENCE 5 (Arabidopsis thaliana)
AUR62000085	0	Has Orthologs	Cluster 2891		Quinoa Overrepresented	Protein of unknown function
AUR62000086	0	Has Orthologs	Cluster 1168			SimilarB34: Histone H3.2 (Nicotiana tabacum)
AUR62000087	0	Has Orthologs	Cluster 4167		Quinoa Overrepresented	Protein of unknown function
AUR62000088	0	Has Orthologs	Cluster 5214	Shoot Up		SimilarBHLH130: Transcription factor bHLH130 (Arabidopsis thaliana)			21.4285	30.6516
AUR62000089	0	Has Orthologs	Cluster 5215			SimilarDRT100: DNA-damage-repair/toleration protein DRT100 (Arabidopsis thaliana)
AUR62000090	0	Has Orthologs	Cluster 2439			Protein of unknown function
AUR62000091	0	Has Orthologs	Cluster 3937	Root Down; Shoot Up		SimilarPSBO: Oxygen-evolving enhancer protein 1%2C chloroplastic (Spinacia oleracea)	88.8897	34.6723	2293.65	3822.78
AUR62000092	0	Has Orthologs	Cluster 5216			SimilarRKD5: Protein RKD5 (Arabidopsis thaliana)
AUR62000093	0	Has Orthologs	Cluster 3938	Shoot Down		SimilarUCNL: Serine/threonine-protein kinase UCNL (Arabidopsis thaliana)			5.75647	2.7581
AUR62000094	0	Has Orthologs	Cluster 2488			SimilarGTF3C3: General transcription factor 3C polypeptide 3 (Homo sapiens)
AUR62000095	0	Has Orthologs	Cluster 5217			SimilarPLT2: AP2-like ethylene-responsive transcription factor PLT2 (Arabidopsis thaliana)
AUR62000096	0	Has Orthologs	Cluster 5218			Similarslmo: Protein slowmo homolog (Dictyostelium discoideum)
AUR62000097	0	Has Orthologs	Cluster 5219	Shoot Down		SimilarNEK6: Serine/threonine-protein kinase Nek6 (Arabidopsis thaliana)			6.27962	3.55848
AUR62000098	8	Has Orthologs	Cluster 5220			SimilarZTP29: Zinc transporter ZTP29 (Arabidopsis thaliana)
AUR62000099	0	Quinoa Specific	Cluster 16213		Quinoa Overrepresented	SimilarWIP2: Zinc finger protein WIP2 (Arabidopsis thaliana)
AUR62000100	0	Has Orthologs	Cluster 5221			SimilarOEP80: Outer envelope protein 80%2C chloroplastic (Arabidopsis thaliana)
AUR62000101	8	Has Orthologs	Cluster 1176		Quinoa Overrepresented	SimilarHMA5: Probable copper-transporting ATPase HMA5 (Arabidopsis thaliana)
AUR62000102	3	Has Orthologs	Cluster 1947			SimilarANT: ADP%2CATP carrier protein%2C mitochondrial (Solanum tuberosum)
AUR62000103	0	Has Orthologs	Cluster 13153			SimilarPCMP-E28: Pentatricopeptide repeat-containing protein At2g22410%2C mitochondrial (Arabidopsis thaliana)
AUR62000104	0	Has Orthologs	Cluster 11293			Protein of unknown function
AUR62000105	1	Singleton	N/A			SimilarMSL10: Mechanosensitive ion channel protein 10 (Arabidopsis thaliana)
AUR62000106	0	Has Orthologs	Cluster 1060		Quinoa Overrepresented	SimilarRetrovirus-related Pol polyprotein from transposon TNT 1-94 (Nicotiana tabacum)
AUR62000107	0	Has Orthologs	Cluster 2801	Root Down	Quinoa Overrepresented (with Beet)	SimilarXDH1: Xanthine dehydrogenase 1 (Arabidopsis thaliana)	15.6871	7.77307
AUR62000108	2	Has Orthologs	Cluster 5222			SimilarLPAT2: 1-acyl-sn-glycerol-3-phosphate acyltransferase 2 (Arabidopsis thaliana)
AUR62000109	0	Has Orthologs	Cluster 5223			SimilarRBP47B': Polyadenylate-binding protein RBP47B' (Arabidopsis thaliana)
AUR62000110	0	Singleton	N/A			SimilarGONST3: GDP-mannose transporter GONST3 (Arabidopsis thaliana)
AUR62000111	0	Has Orthologs	Cluster 5224			SimilarORC1: Origin of replication complex subunit 1 (Oryza sativa subsp. japonica)
AUR62000112	0	Singleton	N/A			SimilarALDH3F1: Aldehyde dehydrogenase family 3 member F1 (Arabidopsis thaliana)
AUR62000113	0	Has Orthologs	Cluster 5225	Shoot Down		Similar3-oxo-Delta(4%2C5)-steroid 5-beta-reductase (Digitalis lanata)			19.4148	12.4047
AUR62000114	0	Has Orthologs	Cluster 2294	Shoot Up		Similarder: GTPase Der (Anabaena variabilis (strain ATCC 29413 / PCC 7937))			3.32983	5.55658
AUR62000115	0	Has Orthologs	Cluster 5226			SimilarMYB46: Transcription factor MYB46 (Arabidopsis thaliana)
AUR62000116	0	Has Orthologs	Cluster 1026		Quinoa Overrepresented	SimilarOs05g0583200: Zinc finger BED domain-containing protein RICESLEEPER 3 (Oryza sativa subsp. japonica)
AUR62000117	19	Has Orthologs	Cluster 1317	Shoot Up		SimilarDIT1: Dicarboxylate transporter 1%2C chloroplastic (Spinacia oleracea)			16.4503	26.9063
AUR62000118	0	Quinoa Specific	Cluster 16214		Quinoa Overrepresented	SimilarPCMP-E47: Pentatricopeptide repeat-containing protein At2g03380%2C mitochondrial (Arabidopsis thaliana)
AUR62000119	0	Has Orthologs	Cluster 1484		Quinoa Overrepresented	SimilarAt5g12850: Zinc finger CCCH domain-containing protein 56 (Arabidopsis thaliana)
AUR62000120	0	Has Orthologs	Cluster 5227			SimilarArmc8: Armadillo repeat-containing protein 8 (Mus musculus)
AUR62000121	0	Has Orthologs	Cluster 5228			SimilarHNRNPF: Heterogeneous nuclear ribonucleoprotein F (Macaca fascicularis)
AUR62000122	0	Has Orthologs	Cluster 5229			Protein of unknown function
AUR62000123	0	Singleton	N/A	Shoot Up		Protein of unknown function			6.28413	10.7833
AUR62000124	0	Quinoa Specific	Cluster 16215		Quinoa Overrepresented	Protein of unknown function
AUR62000125	0	Has Orthologs	Cluster 5231	Shoot Up		SimilarNFYA9: Nuclear transcription factor Y subunit A-9 (Arabidopsis thaliana)			5.0003	7.8543
AUR62000126	2	Has Orthologs	Cluster 13154	Shoot Down		Similarsec62: Translocation protein sec62 (Schizosaccharomyces pombe (strain 972 / ATCC 24843))			18.619	12.5568
AUR62000127	0	Singleton	N/A			Protein of unknown function
AUR62000128	0	Has Orthologs	Cluster 11549			Protein of unknown function
AUR62000129	0	Has Orthologs	Cluster 1012	Shoot Down	Quinoa Overrepresented	SimilarCPK8: Calcium-dependent protein kinase 8 (Arabidopsis thaliana)			21.5553	15.3376
AUR62000130	1	Has Orthologs	Cluster 5232			Protein of unknown function
AUR62000131	0	Has Orthologs	Cluster 3330	Shoot Up		SimilarSIR: Sulfite reductase [ferredoxin]%2C chloroplastic (Pisum sativum)			68.1706	93.0158
AUR62000132	0	Has Orthologs	Cluster 5233	Shoot Up		SimilarPhotosystem II 5 kDa protein%2C chloroplastic (Petunia hybrida)			356.897	698.074
AUR62000133	1	Has Orthologs	Cluster 11550			Protein of unknown function
AUR62000134	0	Has Orthologs	Cluster 14517			Protein of unknown function
AUR62000135	0	Has Orthologs	Cluster 5234			Protein of unknown function
AUR62000136	0	Has Orthologs	Cluster 5235			Protein of unknown function
AUR62000137	0	Has Orthologs	Cluster 5236			SimilarOBE4: Protein OBERON 4 (Arabidopsis thaliana)
AUR62000138	0	Has Orthologs	Cluster 5237			Protein of unknown function
AUR62000139	0	Has Orthologs	Cluster 4168	Root Up; Shoot Up	Quinoa Overrepresented	SimilarARI1: NADPH-dependent aldehyde reductase ARI1 (Saccharomyces cerevisiae (strain ATCC 204508 / S288c))	0.693502	4.55946	16.3352	26.6157
AUR62000140	0	Has Orthologs	Cluster 1698	Root Up	Quinoa Overrepresented (with Beet)	SimilarGRP2: Putative NADPH-dependent methylglyoxal reductase GRP2 (Candida albicans (strain SC5314 / ATCC MYA-2876))	12.0976	48.3004
AUR62000141	0	Has Orthologs	Cluster 1698	Shoot Down	Quinoa Overrepresented (with Beet)	SimilarCCR1: Cinnamoyl-CoA reductase 1 (Arabidopsis thaliana)			4.14454	0.618533
AUR62000142	0	Has Orthologs	Cluster 1044		Quinoa Overrepresented	SimilarPutative AC transposase (Zea mays)
AUR62000143	0	Has Orthologs	Cluster 1762	Shoot Up		SimilarAt1g51440: Phospholipase A1-Igamma3%2C chloroplastic (Arabidopsis thaliana)			30.8627	83.8525
AUR62000144	0	Has Orthologs	Cluster 3329			SimilarRER4: Protein RETICULATA-RELATED 4%2C chloroplastic (Arabidopsis thaliana)
AUR62000145	0	Has Orthologs	Cluster 5238			SimilarNADK1: NAD(H) kinase 1 (Arabidopsis thaliana)
AUR62000146	0	Has Orthologs	Cluster 5239			SimilarTRO: Protein TRAUCO (Arabidopsis thaliana)
AUR62000147	2	Has Orthologs	Cluster 1208			SimilarABCG13: ABC transporter G family member 13 (Arabidopsis thaliana)
AUR62000148	0	Has Orthologs	Cluster 1555	Shoot Up	Quinoa Overrepresented	SimilarBAM1: Beta-amylase 1%2C chloroplastic (Arabidopsis thaliana)			8.8481	16.7142
AUR62000149	0	Singleton	N/A			SimilarGNS1: Glucan endo-1%2C3-beta-glucosidase%2C basic isoform (Prunus persica)
AUR62000150	0	Has Orthologs	Cluster 1918			SimilarTFIIB2: Transcription initiation factor IIB-2 (Arabidopsis thaliana)
AUR62000151	1	Has Orthologs	Cluster 5240			Protein of unknown function
AUR62000152	0	Singleton	N/A			Similarrbm8a: RNA-binding protein 8A (Salmo salar)
AUR62000153	0	Has Orthologs	Cluster 5241			SimilarOs07g0682400: Zinc finger CCCH domain-containing protein 53 (Oryza sativa subsp. japonica)
AUR62000154	0	Has Orthologs	Cluster 5242			Protein of unknown function
AUR62000155	0	Has Orthologs	Cluster 5243	Root Down	Quinoa Overrepresented	SimilarGlucan endo-1%2C3-beta-glucosidase%2C acidic isoform PR-Q' (Nicotiana tabacum)	113.315	6.41763
AUR62000156	0	Has Orthologs	Cluster 5243	Root Down	Quinoa Overrepresented	SimilarSP41B: Glucan endo-1%2C3-beta-glucosidase (Nicotiana tabacum)	62.9293	4.59786
AUR62000157	0	Has Orthologs	Cluster 4169			Protein of unknown function
AUR62000158	1	Singleton	N/A			Protein of unknown function
AUR62000159	1	Has Orthologs	Cluster 2475	Shoot Down		SimilarGNS1: Glucan endo-1%2C3-beta-glucosidase%2C basic isoform (Prunus persica)			7.45862	1.43495
AUR62000160	7	Has Orthologs	Cluster 1210	Shoot Down	Quinoa Overrepresented	SimilarLHT1: Lysine histidine transporter 1 (Arabidopsis thaliana)			5.18526	1.83868
AUR62000161	0	Has Orthologs	Cluster 5244			SimilarDNAJC7: DnaJ homolog subfamily C member 7 (Pongo abelii)
AUR62000162	0	Has Orthologs	Cluster 4170	Shoot Up	Quinoa Overrepresented	Protein of unknown function			5.11782	9.29971
AUR62000163	0	Has Orthologs	Cluster 1000		Quinoa Overrepresented	SimilarAt1g50460: Hexokinase-3 (Arabidopsis thaliana)
AUR62000164	0	Has Orthologs	Cluster 5245			SimilarUBC20: Ubiquitin-conjugating enzyme E2 20 (Arabidopsis thaliana)
AUR62000165	0	Has Orthologs	Cluster 5246			SimilarThumpd1: THUMP domain-containing protein 1 (Mus musculus)
AUR62000166	0	Has Orthologs	Cluster 5247			Protein of unknown function
AUR62000167	0	Has Orthologs	Cluster 5248			SimilarCHLD: Magnesium-chelatase subunit ChlD%2C chloroplastic (Nicotiana tabacum)
AUR62000168	0	Has Orthologs	Cluster 5249			SimilarPTM: DDT domain-containing protein PTM (Arabidopsis thaliana)
AUR62000169	0	Has Orthologs	Cluster 5250			Protein of unknown function
AUR62000170	1	Has Orthologs	Cluster 5251	Shoot Up		SimilarGAST1: Protein GAST1 (Solanum lycopersicum)			386.402	671.147
AUR62000171	0	Has Orthologs	Cluster 5252			SimilarSCL3: Scarecrow-like protein 3 (Arabidopsis thaliana)
AUR62000172	0	Has Orthologs	Cluster 5253			SimilarpsuG: Pseudouridine-5'-phosphate glycosidase (Brevibacillus brevis (strain 47 / JCM 6285 / NBRC 100599))
AUR62000173	0	Singleton	N/A			SimilarAt2g37660: Uncharacterized protein At2g37660%2C chloroplastic (Arabidopsis thaliana)
AUR62000174	0	Has Orthologs	Cluster 2295	Shoot Up		SimilarCHR5: Protein CHROMATIN REMODELING 5 (Arabidopsis thaliana)			64.7246	92.4201
AUR62000175	0	Has Orthologs	Cluster 5254			SimilarLIG4: DNA ligase 4 (Arabidopsis thaliana)
AUR62000176	0	Has Orthologs	Cluster 5255			SimilarAt4g18380: F-box protein At4g18380 (Arabidopsis thaliana)
AUR62000177	7	Has Orthologs	Cluster 11420			SimilarAt1g34470: Probable magnesium transporter NIPA3 (Arabidopsis thaliana)
AUR62000178	0	Singleton	N/A			SimilarANNAT8: Annexin D8 (Arabidopsis thaliana)
AUR62000179	0	Has Orthologs	Cluster 1699			SimilarCS: Citrate synthase%2C mitochondrial (Daucus carota)
AUR62000180	0	Has Orthologs	Cluster 1189			SimilarHERC1: Probable E3 ubiquitin-protein ligase HERC1 (Homo sapiens)
AUR62000181	0	Has Orthologs	Cluster 5256			SimilarRLT1: Homeobox-DDT domain protein RLT1 (Arabidopsis thaliana)
AUR62000182	8	Has Orthologs	Cluster 4171	Shoot Down		SimilarSPP: Signal peptide peptidase (Arabidopsis thaliana)			40.9113	26.1383
AUR62000183	0	Has Orthologs	Cluster 3332			SimilarAt5g01110: Pentatricopeptide repeat-containing protein At5g01110 (Arabidopsis thaliana)
AUR62000184	0	Has Orthologs	Cluster 15143			Protein of unknown function
AUR62000185	0	Has Orthologs	Cluster 13155			SimilarLRP1: Protein LATERAL ROOT PRIMORDIUM 1 (Arabidopsis thaliana)
AUR62000186	0	Has Orthologs	Cluster 5257			Similarankrd54: Ankyrin repeat domain-containing protein 54 (Danio rerio)
AUR62000187	0	Has Orthologs	Cluster 13156			Protein of unknown function
AUR62000188	0	Has Orthologs	Cluster 5258			Protein of unknown function
AUR62000189	0	Has Orthologs	Cluster 14518			Protein of unknown function
AUR62000190	7	Quinoa Specific	Cluster 16216		Quinoa Overrepresented	SimilarABCG23: ABC transporter G family member 23 (Arabidopsis thaliana)
AUR62000191	0	Has Orthologs	Cluster 4084			Protein of unknown function
AUR62000192	1	Has Orthologs	Cluster 1165	Shoot Down	Quinoa Overrepresented	SimilarNPC2: Non-specific phospholipase C2 (Arabidopsis thaliana)			4.0839	0.958408
AUR62000193	0	Has Orthologs	Cluster 2084			SimilarSMG7: Protein SMG7 (Arabidopsis thaliana)
AUR62000194	0	Has Orthologs	Cluster 5259	Shoot Up		Protein of unknown function			11.5682	17.5982
AUR62000195	1	Has Orthologs	Cluster 5260			SimilarROPGAP7: Rho GTPase-activating protein 7 (Arabidopsis thaliana)
AUR62000196	0	Singleton	N/A			SimilarAt1g62350: Pentatricopeptide repeat-containing protein At1g62350 (Arabidopsis thaliana)
AUR62000197	0	Singleton	N/A			Protein of unknown function
AUR62000198	0	Has Orthologs	Cluster 5261			SimilarNAF1: H/ACA ribonucleoprotein complex non-core subunit NAF1 (Homo sapiens)
AUR62000199	0	Singleton	N/A			Protein of unknown function
AUR62000200	0	Has Orthologs	Cluster 4172		Quinoa Overrepresented	SimilarHAP2: Protein HAPLESS 2 (Arabidopsis thaliana)
AUR62000201	8	Has Orthologs	Cluster 5262	Root Up; Shoot Up		SimilarCLT3: Protein CLT3%2C chloroplastic (Arabidopsis thaliana)	10.0131	22.3539	6.05391	12.51
AUR62000202	0	Has Orthologs	Cluster 1158	Shoot Down	Quinoa Overrepresented	SimilarCEL1: Endoglucanase 8 (Arabidopsis thaliana)			17.015	6.64657
AUR62000203	0	Has Orthologs	Cluster 1012		Quinoa Overrepresented	SimilarCPK17: Calcium-dependent protein kinase 17 (Arabidopsis thaliana)
AUR62000204	0	Has Orthologs	Cluster 13157			SimilarAt5g19370: Rhodanese-like/PpiC domain-containing protein 12%2C chloroplastic (Arabidopsis thaliana)
AUR62000205	0	Has Orthologs	Cluster 5263			SimilarAt5g06400: Putative pentatricopeptide repeat-containing protein At5g06400%2C mitochondrial (Arabidopsis thaliana)
AUR62000206	0	Singleton	N/A			Protein of unknown function
AUR62000207	0	Has Orthologs	Cluster 5264			SimilarPYD2: Dihydropyrimidinase (Arabidopsis thaliana)
AUR62000208	0	Has Orthologs	Cluster 5265	Shoot Up		SimilarERI2: ERI1 exoribonuclease 2 (Homo sapiens)			13.3717	27.3444
AUR62000209	0	Has Orthologs	Cluster 5266			SimilarLAS1: Protein LAS1 (Saccharomyces cerevisiae (strain ATCC 204508 / S288c))
AUR62000210	0	Has Orthologs	Cluster 5267			SimilarHSFB4: Heat stress transcription factor B-4 (Arabidopsis thaliana)
AUR62000211	0	Has Orthologs	Cluster 3333	Shoot Down		SimilarAt2g32560: F-box protein At2g32560 (Arabidopsis thaliana)			11.3421	6.89836
AUR62000212	0	Has Orthologs	Cluster 5268			Protein of unknown function
AUR62000213	0	Has Orthologs	Cluster 4930			SimilarERF6: Ethylene-responsive transcription factor 6 (Arabidopsis thaliana)
AUR62000214	0	Has Orthologs	Cluster 14519			Protein of unknown function
AUR62000215	1	Has Orthologs	Cluster 5269			Protein of unknown function
AUR62000216	1	Has Orthologs	Cluster 3334			SimilarRKF3: Probable LRR receptor-like serine/threonine-protein kinase RKF3 (Arabidopsis thaliana)
AUR62000217	0	Has Orthologs	Cluster 5270			Protein of unknown function
AUR62000218	0	Has Orthologs	Cluster 5271			SimilarHMGCL: Hydroxymethylglutaryl-CoA lyase%2C mitochondrial (Arabidopsis thaliana)
AUR62000219	0	Has Orthologs	Cluster 13158			SimilarCPN10: 10 kDa chaperonin (Arabidopsis thaliana)
AUR62000220	0	Has Orthologs	Cluster 5272			Protein of unknown function
AUR62000221	0	Has Orthologs	Cluster 5273			SimilarECM29: Proteasome-associated protein ECM29 homolog (Homo sapiens)
AUR62000222	0	Has Orthologs	Cluster 1096	Shoot Up		SimilarTUBB: Tubulin beta chain (Hordeum vulgare)			191.784	265.497
AUR62000223	0	Has Orthologs	Cluster 5274			SimilarPCMP-H8: Pentatricopeptide repeat-containing protein At1g18485 (Arabidopsis thaliana)
AUR62000224	0	Has Orthologs	Cluster 5275			Protein of unknown function
AUR62000225	0	Has Orthologs	Cluster 1645			SimilarSCAB1: Stomatal closure-related actin-binding protein 1 (Arabidopsis thaliana)
AUR62000226	0	Has Orthologs	Cluster 11294	Root Up; Shoot Up		SimilarMOCS2: Molybdopterin synthase catalytic subunit (Arabidopsis thaliana)	17.291	39.3146	13.5336	32.8606
AUR62000227	0	Has Orthologs	Cluster 5276			SimilarG2/mitotic-specific cyclin S13-6 (Glycine max)
AUR62000228	0	Has Orthologs	Cluster 5277			SimilarAt5g26960: F-box/kelch-repeat protein At5g26960 (Arabidopsis thaliana)
AUR62000229	0	Has Orthologs	Cluster 5278			Similareif2b3: Translation initiation factor eIF-2B subunit gamma (Dictyostelium discoideum)
AUR62000230	0	Has Orthologs	Cluster 14520		Quinoa Overrepresented	SimilarRR24: Two-component response regulator ORR24 (Oryza sativa subsp. indica)
AUR62000231	0	Has Orthologs	Cluster 4049			SimilarNFS2: Cysteine desulfurase 1%2C chloroplastic (Arabidopsis thaliana)
AUR62000232	2	Has Orthologs	Cluster 5279			Similarnca2: Nuclear control of ATPase protein 2 (Dictyostelium discoideum)
AUR62000233	0	Has Orthologs	Cluster 13159	Root Up; Shoot Up		SimilarCysteine proteinase inhibitor (Vigna unguiculata)	21.8851	43.9294	59.7746	156.325
AUR62000234	0	Has Orthologs	Cluster 11551	Root Down; Shoot Down	Quinoa Overrepresented	Protein of unknown function	34.8059	10.9292	6.56367	3.17986
AUR62000235	1	Has Orthologs	Cluster 1948	Root Up; Shoot Up		SimilarSD25: G-type lectin S-receptor-like serine/threonine-protein kinase SD2-5 (Arabidopsis thaliana)	6.51883	15.9472	2.65175	6.5227
AUR62000236	0	Has Orthologs	Cluster 5280			SimilarPOLD4: DNA polymerase delta subunit 4 (Bos taurus)
AUR62000237	0	Singleton	N/A			Protein of unknown function
AUR62000238	2	Has Orthologs	Cluster 1948			SimilarSD25: G-type lectin S-receptor-like serine/threonine-protein kinase SD2-5 (Arabidopsis thaliana)
AUR62000239	0	Has Orthologs	Cluster 5281			Protein of unknown function
AUR62000240	1	Has Orthologs	Cluster 4085			SimilarPHB6: Prohibitin-6%2C mitochondrial (Arabidopsis thaliana)
AUR62000241	8	Has Orthologs	Cluster 5282	Shoot Up		SimilartyrP-B: Tyrosine-specific transport protein 2 (Haemophilus influenzae (strain ATCC 51907 / DSM 11121 / KW20 / Rd))			8.35213	13.7804
AUR62000242	0	Has Orthologs	Cluster 13161			SimilarRING1: E3 ubiquitin-protein ligase RING1 (Gossypium hirsutum)
AUR62000243	0	Has Orthologs	Cluster 5283			SimilarAt5g12110: Elongation factor 1-beta 1 (Arabidopsis thaliana)
AUR62000244	0	Has Orthologs	Cluster 5284			SimilarGAM1: Transcription factor GAMYB (Oryza sativa subsp. indica)
AUR62000245	0	Has Orthologs	Cluster 13160			SimilarUREF: Urease accessory protein F (Arabidopsis thaliana)
AUR62000246	0	Has Orthologs	Cluster 5285			SimilarMAG2L: RINT1-like protein MAG2L (Arabidopsis thaliana)
AUR62000247	0	Quinoa Specific	Cluster 16217		Quinoa Overrepresented	SimilarCDKC-1: Cyclin-dependent kinase C-1 (Arabidopsis thaliana)
AUR62000248	1	Has Orthologs	Cluster 1055		Quinoa Overrepresented (with Beet)	SimilarBp10: L-ascorbate oxidase homolog (Brassica napus)
AUR62000249	0	Has Orthologs	Cluster 1055		Quinoa Overrepresented (with Beet)	SimilarSKU5: Monocopper oxidase-like protein SKU5 (Arabidopsis thaliana)
AUR62000250	0	Has Orthologs	Cluster 5286			SimilarDEGP10: Protease Do-like 10%2C mitochondrial (Arabidopsis thaliana)
AUR62000251	0	Has Orthologs	Cluster 14521			SimilarHMGIY2: HMG-Y-related protein A (Zea mays)
AUR62000252	0	Has Orthologs	Cluster 5287			SimilarLBD6: LOB domain-containing protein 6 (Arabidopsis thaliana)
AUR62000253	0	Has Orthologs	Cluster 5288			SimilarCog1: Conserved oligomeric Golgi complex subunit 1 (Mus musculus)
AUR62000254	0	Has Orthologs	Cluster 1502			SimilarGLU3: Endoglucanase 12 (Oryza sativa subsp. japonica)
AUR62000255	0	Has Orthologs	Cluster 2118			SimilarHEXO3: Beta-hexosaminidase 3 (Arabidopsis thaliana)
AUR62000256	0	Has Orthologs	Cluster 1835			SimilarIP5P15: Type II inositol polyphosphate 5-phosphatase 15 (Arabidopsis thaliana)
AUR62000257	0	Has Orthologs	Cluster 14522			SimilarPolygalacturonase (Prunus persica)
AUR62000258	0	Has Orthologs	Cluster 17839		Quinoa Overrepresented (with Beet)	SimilarDBR: 2-alkenal reductase (NADP(+)-dependent) (Nicotiana tabacum)
AUR62000259	2	Has Orthologs	Cluster 2263			SimilarAt5g48380: Probably inactive leucine-rich repeat receptor-like protein kinase At5g48380 (Arabidopsis thaliana)
AUR62000260	0	Has Orthologs	Cluster 1834			SimilarAt2g31810: Acetolactate synthase small subunit 2%2C chloroplastic (Arabidopsis thaliana)
AUR62000261	0	Has Orthologs	Cluster 2892			SimilarWDR5A: COMPASS-like H3K4 histone methylase component WDR5A (Arabidopsis thaliana)
AUR62000262	1	Has Orthologs	Cluster 1836		Quinoa Overrepresented	SimilarLETM1: LETM1 and EF-hand domain-containing protein 1%2C mitochondrial (Gallus gallus)
AUR62000263	0	Has Orthologs	Cluster 5289			SimilarSYN4: Sister chromatid cohesion 1 protein 4 (Arabidopsis thaliana)
AUR62000264	0	Has Orthologs	Cluster 4173			SimilarBGLU42: Beta-glucosidase 42 (Arabidopsis thaliana)
AUR62000265	0	Has Orthologs	Cluster 2476			SimilarAt3g02650: Pentatricopeptide repeat-containing protein At3g02650%2C mitochondrial (Arabidopsis thaliana)
AUR62000266	0	Has Orthologs	Cluster 4174			SimilarVHA-H: V-type proton ATPase subunit H (Arabidopsis thaliana)
AUR62000267	0	Has Orthologs	Cluster 5290	Shoot Up		SimilarHTATSF1: HIV Tat-specific factor 1 (Homo sapiens)			5.98417	11.4613
AUR62000268	4	Has Orthologs	Cluster 5017			Protein of unknown function
AUR62000269	0	Has Orthologs	Cluster 1268	Shoot Down	Quinoa Overrepresented	SimilarStearoyl-[acyl-carrier-protein] 9-desaturase%2C chloroplastic (Simmondsia chinensis)			13.4789	8.12182
AUR62000270	0	Has Orthologs	Cluster 5291			SimilarFAS1: Chromatin assembly factor 1 subunit FAS1 (Arabidopsis thaliana)
AUR62000271	0	Singleton	N/A			SimilarHD3A: Protein HEADING DATE 3A (Oryza sativa subsp. japonica)
AUR62000272	0	Has Orthologs	Cluster 11552	Shoot Down		SimilarHHT1: Omega-hydroxypalmitate O-feruloyl transferase (Arabidopsis thaliana)			6.98378	3.27015
AUR62000273	0	Has Orthologs	Cluster 1082		Quinoa Overrepresented	SimilarOs03g0733400: Zinc finger BED domain-containing protein RICESLEEPER 2 (Oryza sativa subsp. japonica)
AUR62000274	2	Has Orthologs	Cluster 5016			SimilarRER3: Protein RETICULATA-RELATED 3%2C chloroplastic (Arabidopsis thaliana)
AUR62000275	2	Has Orthologs	Cluster 14523		Quinoa Overrepresented	Protein of unknown function
AUR62000276	0	Has Orthologs	Cluster 5292	Shoot Up		SimilarPGLP1B: Phosphoglycolate phosphatase 1B%2C chloroplastic (Arabidopsis thaliana)			126.441	170.346
AUR62000277	0	Has Orthologs	Cluster 1533			SimilarARI8: Probable E3 ubiquitin-protein ligase ARI8 (Arabidopsis thaliana)
AUR62000278	0	Has Orthologs	Cluster 5293			SimilarGCP2: Gamma-tubulin complex component 2 (Arabidopsis thaliana)
AUR62000279	3	Has Orthologs	Cluster 1001			SimilarINRPK1: Receptor-like protein kinase (Ipomoea nil)
AUR62000280	0	Has Orthologs	Cluster 13162			SimilarBBM2: AP2-like ethylene-responsive transcription factor BBM2 (Brassica napus)
AUR62000281	0	Has Orthologs	Cluster 5294			SimilarLCAT3: Phospholipase A(1) LCAT3 (Arabidopsis thaliana)
AUR62000282	0	Has Orthologs	Cluster 2836			SimilarRPL38A: 60S ribosomal protein L38 (Arabidopsis thaliana)
AUR62000283	0	Has Orthologs	Cluster 1250			SimilarAt3g03300: Endoribonuclease Dicer homolog 2 (Arabidopsis thaliana)
AUR62000284	0	Has Orthologs	Cluster 5295			SimilarPRFB1: Peptide chain release factor PrfB1%2C chloroplastic (Arabidopsis thaliana)
AUR62000285	0	Has Orthologs	Cluster 3715			SimilarTRB3: Telomere repeat-binding factor 3 (Arabidopsis thaliana)
AUR62000286	0	Singleton	N/A			SimilarDHRS7: Dehydrogenase/reductase SDR family member 7 (Homo sapiens)
AUR62000287	0	Has Orthologs	Cluster 2189			SimilarCRT3: Calreticulin-3 (Arabidopsis thaliana)
AUR62000288	0	Has Orthologs	Cluster 3714			SimilarMTACP2: Acyl carrier protein 2%2C mitochondrial (Arabidopsis thaliana)
AUR62000289	0	Quinoa Specific	Cluster 11553		Quinoa Overrepresented	Protein of unknown function
AUR62000290	0	Has Orthologs	Cluster 1376		Quinoa Overrepresented (with Beet)	Protein of unknown function
AUR62000291	0	Has Orthologs	Cluster 2387		Quinoa Overrepresented	SimilargrpE: Protein GrpE (Oligotropha carboxidovorans (strain ATCC 49405 / DSM 1227 / OM5))
AUR62000292	0	Singleton	N/A			Protein of unknown function
AUR62000293	0	Has Orthologs	Cluster 5296			SimilarLuc7l: Putative RNA-binding protein Luc7-like 1 (Mus musculus)
AUR62000294	3	Has Orthologs	Cluster 5297			SimilarTIC20-II: Protein TIC 20-II%2C chloroplastic (Arabidopsis thaliana)
AUR62000295	0	Singleton	N/A			SimilarOs01g0895100: Probable membrane-associated 30 kDa protein%2C chloroplastic (Oryza sativa subsp. japonica)
AUR62000296	0	Has Orthologs	Cluster 3713	Shoot Up		SimilarThioredoxin F-type%2C chloroplastic (Spinacia oleracea)			183.814	268.59
AUR62000297	0	Has Orthologs	Cluster 3712			SimilarAt1g65240: Aspartic proteinase-like protein 2 (Arabidopsis thaliana)
AUR62000298	1	Has Orthologs	Cluster 5298	Shoot Up		Protein of unknown function			39.7728	66.5541
AUR62000299	1	Has Orthologs	Cluster 1516	Shoot Down		SimilarSCPL20: Serine carboxypeptidase-like 20 (Arabidopsis thaliana)			19.5878	7.04121
AUR62000300	0	Has Orthologs	Cluster 3711			SimilarPPC6-1: Probable protein phosphatase 2C 33 (Arabidopsis thaliana)
AUR62000301	0	Has Orthologs	Cluster 5299			SimilarSNRPB: Small nuclear ribonucleoprotein-associated protein B' (Macropus eugenii)
AUR62000302	0	Has Orthologs	Cluster 1149		Quinoa Overrepresented	Protein of unknown function
AUR62000303	0	Has Orthologs	Cluster 5300			SimilarPYRR: Riboflavin biosynthesis protein PYRR%2C chloroplastic (Zea mays)
AUR62000304	0	Has Orthologs	Cluster 3710			SimilarBZW2: Basic leucine zipper and W2 domain-containing protein 2 (Gallus gallus)
AUR62000305	1	Has Orthologs	Cluster 5301			Protein of unknown function
AUR62000306	0	Has Orthologs	Cluster 5302			SimilarIPI1: Isopentenyl-diphosphate Delta-isomerase I (Camptotheca acuminata)
AUR62000307	0	Has Orthologs	Cluster 5303			SimilarAt5g16450: Putative 4-hydroxy-4-methyl-2-oxoglutarate aldolase 2 (Arabidopsis thaliana)
AUR62000308	0	Has Orthologs	Cluster 5304			SimilarEif2b5: Translation initiation factor eIF-2B subunit epsilon (Rattus norvegicus)
AUR62000309	0	Singleton	N/A			SimilarAt2g40240: Pentatricopeptide repeat-containing protein At2g40240%2C mitochondrial (Arabidopsis thaliana)
AUR62000310	2	Has Orthologs	Cluster 13163			SimilarSEI1: Seipin-1 (Arabidopsis thaliana)
AUR62000311	0	Has Orthologs	Cluster 11554			SimilarWRKY2: Probable WRKY transcription factor 2 (Arabidopsis thaliana)
AUR62000312	0	Has Orthologs	Cluster 5305			Protein of unknown function
AUR62000313	0	Has Orthologs	Cluster 5306			SimilarAt1g05000: Probable tyrosine-protein phosphatase At1g05000 (Arabidopsis thaliana)
AUR62000314	2	Has Orthologs	Cluster 4175	Root Down		SimilarPSAL: Photosystem I reaction center subunit XI%2C chloroplastic (Spinacia oleracea)	51.0526	15.1346
AUR62000315	0	Has Orthologs	Cluster 11555	Shoot Down		SimilarPCMP-H32: Putative pentatricopeptide repeat-containing protein At3g23330 (Arabidopsis thaliana)			3.42756	1.45595
AUR62000316	12	Has Orthologs	Cluster 1105			SimilarNRT2.1: High-affinity nitrate transporter 2.1 (Arabidopsis thaliana)
AUR62000317	12	Has Orthologs	Cluster 1105			SimilarNRT2.5: High affinity nitrate transporter 2.5 (Arabidopsis thaliana)
AUR62000318	13	Has Orthologs	Cluster 1105			SimilarOsI_29993: GDT1-like protein 4 (Oryza sativa subsp. indica)
AUR62000319	0	Has Orthologs	Cluster 3709			SimilarZinc finger CCCH domain-containing protein ZFN-like (Pisum sativum)
AUR62000320	0	Has Orthologs	Cluster 5015			Protein of unknown function
AUR62000321	1	Has Orthologs	Cluster 2893		Quinoa Overrepresented	Protein of unknown function
AUR62000322	0	Has Orthologs	Cluster 2893		Quinoa Overrepresented	SimilarPolygalacturonase (Prunus persica)
AUR62000323	8	Has Orthologs	Cluster 5307			SimilarPIN8: Putative auxin efflux carrier component 8 (Arabidopsis thaliana)
AUR62000324	0	Singleton	N/A			Protein of unknown function
AUR62000325	0	Has Orthologs	Cluster 5308			SimilarCBSX6: CBS domain-containing protein CBSX6 (Arabidopsis thaliana)
AUR62000326	0	Quinoa Specific	Cluster 14524		Quinoa Overrepresented	SimilarAt1g63130: Pentatricopeptide repeat-containing protein At1g63130%2C mitochondrial (Arabidopsis thaliana)
AUR62000327	0	Has Orthologs	Cluster 4176		Quinoa Overrepresented	Similarfli-1: Protein flightless-1 homolog (Caenorhabditis elegans)
AUR62000328	0	Has Orthologs	Cluster 1026		Quinoa Overrepresented	SimilarOs03g0733400: Zinc finger BED domain-containing protein RICESLEEPER 2 (Oryza sativa subsp. japonica)
AUR62000329	0	Quinoa Specific	Cluster 14524		Quinoa Overrepresented	SimilarAt5g59900: Putative pentatricopeptide repeat-containing protein At5g59900 (Arabidopsis thaliana)
AUR62000330	1	Has Orthologs	Cluster 4176		Quinoa Overrepresented	SimilarCLV2: Leucine-rich repeat receptor-like protein CLAVATA2 (Arabidopsis thaliana)
AUR62000331	0	Has Orthologs	Cluster 5309			SimilarTGD3: Protein TRIGALACTOSYLDIACYLGLYCEROL 3%2C chloroplastic (Arabidopsis thaliana)
AUR62000332	0	Has Orthologs	Cluster 5310			Similargph1: Phosphoglycolate phosphatase 1 (Pseudomonas aeruginosa (strain ATCC 15692 / PAO1 / 1C / PRS 101 / LMG 12228))
AUR62000333	0	Has Orthologs	Cluster 1003		Quinoa Overrepresented	SimilarPUB50: Putative U-box domain-containing protein 50 (Arabidopsis thaliana)
AUR62000334	2	Singleton	N/A			Protein of unknown function
AUR62000335	2	Has Orthologs	Cluster 1003	Shoot Down	Quinoa Overrepresented	SimilarWAKL16: Putative wall-associated receptor kinase-like 16 (Arabidopsis thaliana)			3.72522	1.81966
AUR62000336	3	Has Orthologs	Cluster 1003		Quinoa Overrepresented	SimilarWAKL1: Wall-associated receptor kinase-like 1 (Arabidopsis thaliana)
AUR62000337	0	Has Orthologs	Cluster 13164			SimilarGRP23: Pentatricopeptide repeat-containing protein At1g10270 (Arabidopsis thaliana)
AUR62000338	1	Has Orthologs	Cluster 1003	Root Down	Quinoa Overrepresented	SimilarWAKL22: Wall-associated receptor kinase-like 22 (Arabidopsis thaliana)	3.24915	0.8419
AUR62000339	2	Has Orthologs	Cluster 1003		Quinoa Overrepresented	SimilarWAKL21: Wall-associated receptor kinase-like 21 (Arabidopsis thaliana)
AUR62000340	0	Has Orthologs	Cluster 1003		Quinoa Overrepresented	SimilarSELMODRAFT_444075: Inactive protein kinase SELMODRAFT_444075 (Selaginella moellendorffii)
AUR62000341	1	Has Orthologs	Cluster 1003	Shoot Down	Quinoa Overrepresented	SimilarWAKL8: Wall-associated receptor kinase-like 8 (Arabidopsis thaliana)			9.42766	3.65875
AUR62000342	0	Has Orthologs	Cluster 1000		Quinoa Overrepresented	SimilarPutative AC transposase (Zea mays)
AUR62000343	1	Has Orthologs	Cluster 1003		Quinoa Overrepresented	SimilargefX: RasGEF domain-containing serine/threonine-protein kinase X (Dictyostelium discoideum)
AUR62000344	0	Has Orthologs	Cluster 1003		Quinoa Overrepresented	SimilardrkD: Probable serine/threonine-protein kinase drkD (Dictyostelium discoideum)
AUR62000345	2	Has Orthologs	Cluster 1003		Quinoa Overrepresented	SimilarWAKL2: Wall-associated receptor kinase-like 2 (Arabidopsis thaliana)
AUR62000346	0	Has Orthologs	Cluster 1003		Quinoa Overrepresented	SimilarUMOD: Uromodulin (Homo sapiens)
AUR62000347	0	Has Orthologs	Cluster 5311			SimilarAPK1A: Protein kinase APK1A%2C chloroplastic (Arabidopsis thaliana)
AUR62000348	0	Has Orthologs	Cluster 11556			SimilarPHKG1: Phosphorylase b kinase gamma catalytic chain%2C skeletal muscle/heart isoform (Homo sapiens)
AUR62000349	0	Has Orthologs	Cluster 2296			Similarkin-29: Serine/threonine-protein kinase kin-29 (Caenorhabditis briggsae)
AUR62000350	0	Singleton	N/A			Protein of unknown function
AUR62000351	0	Has Orthologs	Cluster 2296			SimilarPRKCG: Protein kinase C gamma type (Fragment) (Bos taurus)
AUR62000352	0	Has Orthologs	Cluster 5312			SimilarWNK5: Probable serine/threonine-protein kinase WNK5 (Oryza sativa subsp. japonica)
AUR62000353	2	Has Orthologs	Cluster 1003	Root Up	Quinoa Overrepresented	SimilarWAKL1: Wall-associated receptor kinase-like 1 (Arabidopsis thaliana)	4.78588	12.1422
AUR62000354	0	Quinoa Specific	Cluster 16218		Quinoa Overrepresented	SimilarAt1g12700: Putative pentatricopeptide repeat-containing protein At1g12700%2C mitochondrial (Arabidopsis thaliana)
AUR62000355	2	Has Orthologs	Cluster 1003		Quinoa Overrepresented	SimilarWAKL2: Wall-associated receptor kinase-like 2 (Arabidopsis thaliana)
AUR62000356	3	Has Orthologs	Cluster 5313			Protein of unknown function
AUR62000357	6	Singleton	N/A			SimilarALB3L3: ALBINO3-like protein 3%2C mitochondrial (Arabidopsis thaliana)
AUR62000358	0	Quinoa Specific	Cluster 16219		Quinoa Overrepresented	Protein of unknown function
AUR62000359	0	Has Orthologs	Cluster 1489			SimilarDRP4C: Dynamin-related protein 4C (Arabidopsis thaliana)
AUR62000360	1	Singleton	N/A			SimilarMKK1: MAP kinase kinase MKK1/SSP32 (Saccharomyces cerevisiae (strain ATCC 204508 / S288c))
AUR62000361	0	Singleton	N/A			Protein of unknown function
AUR62000362	0	Has Orthologs	Cluster 1095		Quinoa Overrepresented	SimilarOs05g0239150: Zinc finger BED domain-containing protein RICESLEEPER 1 (Oryza sativa subsp. japonica)
AUR62000363	0	Has Orthologs	Cluster 1003		Quinoa Overrepresented	SimilarWAKL21: Wall-associated receptor kinase-like 21 (Arabidopsis thaliana)
AUR62000364	0	Singleton	N/A			Protein of unknown function
AUR62000365	0	Has Orthologs	Cluster 2243		Quinoa Overrepresented	SimilarPEL1: Protein PELOTA 1 (Arabidopsis thaliana)
AUR62000366	0	Has Orthologs	Cluster 5314			Protein of unknown function
AUR62000367	0	Has Orthologs	Cluster 11557			SimilarRGP5: Probable UDP-arabinopyranose mutase 5 (Arabidopsis thaliana)
AUR62000368	0	Has Orthologs	Cluster 15906			SimilarAt4g13230: Uncharacterized protein At4g13230 (Arabidopsis thaliana)
AUR62000369	0	Has Orthologs	Cluster 13165			SimilarAGL104: Agamous-like MADS-box protein AGL104 (Arabidopsis thaliana)
AUR62000370	0	Has Orthologs	Cluster 5315	Shoot Up		SimilarCYP97A3: Protein LUTEIN DEFICIENT 5%2C chloroplastic (Arabidopsis thaliana)			22.6913	32.8578
AUR62000371	0	Has Orthologs	Cluster 1190			SimilarUGT80A2: Sterol 3-beta-glucosyltransferase UGT80A2 (Arabidopsis thaliana)
AUR62000372	0	Has Orthologs	Cluster 5316			SimilarCHR4: Protein CHROMATIN REMODELING 4 (Arabidopsis thaliana)
AUR62000373	0	Has Orthologs	Cluster 5317			SimilarSUFE1: SufE-like protein 1%2C chloroplastic/mitochondrial (Arabidopsis thaliana)
AUR62000374	1	Has Orthologs	Cluster 3834			SimilarVAMP726: Putative vesicle-associated membrane protein 726 (Arabidopsis thaliana)
AUR62000375	0	Has Orthologs	Cluster 14525			SimilarSUMO1: Small ubiquitin-related modifier 1 (Oryza sativa subsp. japonica)
AUR62000376	0	Has Orthologs	Cluster 13166	Shoot Down		SimilarCHL: Chloroplastic lipocalin (Arabidopsis thaliana)			24.1022	15.6326
AUR62000377	0	Has Orthologs	Cluster 1004		Quinoa Overrepresented (with Beet)	SimilarAt1g12700: Putative pentatricopeptide repeat-containing protein At1g12700%2C mitochondrial (Arabidopsis thaliana)
AUR62000378	0	Quinoa Specific	Cluster 16218		Quinoa Overrepresented	Protein of unknown function
AUR62000379	0	Singleton	N/A			Protein of unknown function
AUR62000380	0	Has Orthologs	Cluster 4177			Protein of unknown function
AUR62000381	0	Has Orthologs	Cluster 5318			SimilarNHLRC2: NHL repeat-containing protein 2 (Bos taurus)
AUR62000382	0	Has Orthologs	Cluster 11558			SimilarPME29: Probable pectinesterase 29 (Arabidopsis thaliana)
AUR62000383	0	Singleton	N/A			Protein of unknown function
AUR62000384	1	Has Orthologs	Cluster 2507		Quinoa Overrepresented	SimilarGSVIVT00037159001: Peroxidase 5 (Vitis vinifera)
AUR62000385	10	Has Orthologs	Cluster 5319	Root Down		SimilarIREG3: Solute carrier family 40 member 3%2C chloroplastic (Arabidopsis thaliana)	2.64978	0.909067
AUR62000386	0	Quinoa Specific	Cluster 1537		Quinoa Overrepresented	Protein of unknown function
AUR62000387	0	Has Orthologs	Cluster 5320			SimilarRABEPK: Rab9 effector protein with kelch motifs (Bos taurus)
AUR62000388	0	Has Orthologs	Cluster 5321			SimilarRpap3: RNA polymerase II-associated protein 3 (Mus musculus)
AUR62000389	0	Has Orthologs	Cluster 5322			SimilarEfr3b: Protein EFR3 homolog B (Mus musculus)
AUR62000390	0	Has Orthologs	Cluster 1004		Quinoa Overrepresented (with Beet)	SimilarAt1g12700: Putative pentatricopeptide repeat-containing protein At1g12700%2C mitochondrial (Arabidopsis thaliana)
AUR62000391	0	Has Orthologs	Cluster 1004		Quinoa Overrepresented (with Beet)	SimilarRf1: Protein Rf1%2C mitochondrial (Oryza sativa subsp. indica)
AUR62000392	0	Singleton	N/A			SimilarCLPP5: ATP-dependent Clp protease proteolytic subunit 5%2C chloroplastic (Arabidopsis thaliana)
AUR62000393	0	Has Orthologs	Cluster 5323	Shoot Down		SimilarAt3g22660: Probable rRNA-processing protein EBP2 homolog (Arabidopsis thaliana)			17.9522	11.0697
AUR62000394	0	Has Orthologs	Cluster 5324			SimilarCOX5C: Cytochrome c oxidase subunit 5C (Hordeum vulgare)
AUR62000395	0	Has Orthologs	Cluster 5325			SimilarTAF9: Transcription initiation factor TFIID subunit 9 (Arabidopsis thaliana)
AUR62000396	0	Has Orthologs	Cluster 3833	Root Down; Shoot Up		SimilarCHLN: Nicotianamine synthase (Solanum lycopersicum)	51.9445	16.7066	32.1039	56.86
AUR62000397	0	Has Orthologs	Cluster 5326			Protein of unknown function
AUR62000398	0	Has Orthologs	Cluster 5327			SimilarAt1g09820: Pentatricopeptide repeat-containing protein At1g09820 (Arabidopsis thaliana)
AUR62000399	0	Has Orthologs	Cluster 5328			SimilarLON2: Lon protease homolog%2C mitochondrial (Zea mays)
AUR62000400	0	Quinoa Specific	Cluster 11559		Quinoa Overrepresented	SimilarAt4g38150: Pentatricopeptide repeat-containing protein At4g38150 (Arabidopsis thaliana)
AUR62000401	1	Singleton	N/A			SimilarAt4g01400: Pentatricopeptide repeat-containing protein At4g01400%2C mitochondrial (Arabidopsis thaliana)
AUR62000402	1	Has Orthologs	Cluster 2785			Protein of unknown function
AUR62000403	1	Has Orthologs	Cluster 1000		Quinoa Overrepresented	SimilarOs03g0733400: Zinc finger BED domain-containing protein RICESLEEPER 2 (Oryza sativa subsp. japonica)
AUR62000404	0	Has Orthologs	Cluster 1456		Quinoa Overrepresented	SimilarHARBI1: Putative nuclease HARBI1 (Bos taurus)
AUR62000405	0	Singleton	N/A			Protein of unknown function
AUR62000406	0	Has Orthologs	Cluster 2751		Quinoa Overrepresented	Protein of unknown function
AUR62000407	0	Quinoa Specific	Cluster 12479		Quinoa Overrepresented	Protein of unknown function
AUR62000408	0	Has Orthologs	Cluster 1005		Quinoa Overrepresented	Protein of unknown function
AUR62000409	0	Has Orthologs	Cluster 2751		Quinoa Overrepresented	Protein of unknown function
AUR62000410	0	Has Orthologs	Cluster 1456		Quinoa Overrepresented	Protein of unknown function
AUR62000411	0	Has Orthologs	Cluster 2751		Quinoa Overrepresented	Protein of unknown function
AUR62000412	1	Has Orthologs	Cluster 2751		Quinoa Overrepresented	Protein of unknown function
AUR62000413	0	Quinoa Specific	Cluster 12479		Quinoa Overrepresented	Protein of unknown function
AUR62000414	0	Quinoa Specific	Cluster 12479		Quinoa Overrepresented	Protein of unknown function
AUR62000415	0	Has Orthologs	Cluster 1456		Quinoa Overrepresented	Protein of unknown function
AUR62000416	0	Singleton	N/A			Protein of unknown function
AUR62000417	2	Singleton	N/A	Shoot Down		SimilarGPAT3: Probable glycerol-3-phosphate acyltransferase 3 (Arabidopsis thaliana)			6.98203	1.77577
AUR62000418	2	Singleton	N/A			Protein of unknown function
AUR62000419	0	Singleton	N/A			SimilarZIP4: TPR repeat-containing protein ZIP4 (Arabidopsis thaliana)
AUR62000420	0	Has Orthologs	Cluster 1316	Shoot Down		SimilarIMPA4: Importin subunit alpha-4 (Arabidopsis thaliana)			34.8626	25.7414
AUR62000421	0	Has Orthologs	Cluster 5329	Shoot Up		SimilarSTR6: Rhodanese-like domain-containing protein 6 (Arabidopsis thaliana)			2.13403	4.4339
AUR62000422	0	Has Orthologs	Cluster 5330	Shoot Up		SimilarXPNPEP3: Probable Xaa-Pro aminopeptidase 3 (Pongo abelii)			4.83303	8.33154
AUR62000423	0	Has Orthologs	Cluster 5331			Protein of unknown function
AUR62000424	0	Has Orthologs	Cluster 2894			Protein of unknown function
AUR62000425	0	Has Orthologs	Cluster 5332			SimilarPCMP-E64: Putative pentatricopeptide repeat-containing protein At1g56570 (Arabidopsis thaliana)
AUR62000426	0	Has Orthologs	Cluster 1077		Quinoa Overrepresented	SimilarINVA: Alkaline/neutral invertase A%2C mitochondrial (Arabidopsis thaliana)
AUR62000427	0	Singleton	N/A			SimilarPPD1: PsbP domain-containing protein 1%2C chloroplastic (Arabidopsis thaliana)
AUR62000428	0	Has Orthologs	Cluster 5333			SimilarAP3M: AP-3 complex subunit mu (Arabidopsis thaliana)
AUR62000429	3	Singleton	N/A			SimilarECH: Golgi apparatus membrane protein-like protein ECHIDNA (Arabidopsis thaliana)
AUR62000430	0	Has Orthologs	Cluster 5334	Shoot Up		SimilarCSP41B: Chloroplast stem-loop binding protein of 41 kDa b%2C chloroplastic (Arabidopsis thaliana)			408.803	574.393
AUR62000431	0	Has Orthologs	Cluster 1706	Shoot Down		SimilarGOLS2: Galactinol synthase 2 (Solanum lycopersicum)			3.67585	0.51829
AUR62000432	0	Has Orthologs	Cluster 1706			Protein of unknown function
AUR62000433	0	Singleton	N/A			SimilarLBD27: LOB domain-containing protein 27 (Arabidopsis thaliana)
AUR62000434	0	Has Orthologs	Cluster 2672			Similartrappc4: Trafficking protein particle complex subunit 4 (Dictyostelium discoideum)
AUR62000435	0	Has Orthologs	Cluster 5335			SimilarABCI20: ABC transporter I family member 20 (Arabidopsis thaliana)
AUR62000436	0	Has Orthologs	Cluster 4178			SimilarARF: ADP-ribosylation factor (Vigna unguiculata)
AUR62000437	9	Has Orthologs	Cluster 5336			SimilarAt1g09380: WAT1-related protein At1g09380 (Arabidopsis thaliana)
AUR62000438	2	Has Orthologs	Cluster 3864			SimilarAt5g43745: Putative ion channel POLLUX-like 2 (Arabidopsis thaliana)
AUR62000439	1	Has Orthologs	Cluster 5337	Shoot Down		SimilarAt1g09390: GDSL esterase/lipase At1g09390 (Arabidopsis thaliana)			29.355	15.1858
AUR62000440	0	Has Orthologs	Cluster 2090			SimilarIDM1: Increased DNA methylation 1 (Arabidopsis thaliana)
AUR62000441	0	Has Orthologs	Cluster 11560			SimilarAt1g09420: Glucose-6-phosphate 1-dehydrogenase 4%2C chloroplastic (Arabidopsis thaliana)
AUR62000442	0	Has Orthologs	Cluster 5338	Root Down; Shoot Down		Similarpcp: Pyrrolidone-carboxylate peptidase (Pyrococcus furiosus (strain ATCC 43587 / DSM 3638 / JCM 8422 / Vc1))	94.6704	52.3981	32.9714	16.6776
AUR62000443	0	Has Orthologs	Cluster 1004		Quinoa Overrepresented (with Beet)	SimilarAt1g12700: Putative pentatricopeptide repeat-containing protein At1g12700%2C mitochondrial (Arabidopsis thaliana)
AUR62000444	1	Has Orthologs	Cluster 1371		Quinoa Overrepresented	SimilarRLP12: Receptor-like protein 12 (Arabidopsis thaliana)
AUR62000445	0	Has Orthologs	Cluster 5339	Shoot Up		SimilarDPBF3: ABSCISIC ACID-INSENSITIVE 5-like protein 2 (Arabidopsis thaliana)			11.8113	17.3691
AUR62000446	0	Has Orthologs	Cluster 2734	Root Up		SimilarAt1g48100: Polygalacturonase At1g48100 (Arabidopsis thaliana)	0.921432	5.84924
AUR62000447	0	Quinoa Specific	Cluster 16220		Quinoa Overrepresented	Protein of unknown function
AUR62000448	0	Quinoa Specific	Cluster 11559		Quinoa Overrepresented	SimilarAt1g09820: Pentatricopeptide repeat-containing protein At1g09820 (Arabidopsis thaliana)
AUR62000449	0	Has Orthologs	Cluster 1152			SimilarASK1: Shaggy-related protein kinase alpha (Arabidopsis thaliana)
AUR62000450	0	Has Orthologs	Cluster 5340			SimilarAt5g26760: Putative RNA polymerase II subunit B1 CTD phosphatase RPAP2 homolog (Arabidopsis thaliana)
AUR62000451	0	Has Orthologs	Cluster 5341			SimilarSPT16: FACT complex subunit SPT16 (Arabidopsis thaliana)
AUR62000452	0	Has Orthologs	Cluster 11561			SimilarGSVIVT00037159001: Peroxidase 5 (Vitis vinifera)
AUR62000453	0	Has Orthologs	Cluster 17851		Quinoa Overrepresented (with Beet)	SimilarPER2: Peroxidase 2 (Zea mays)
AUR62000454	1	Has Orthologs	Cluster 2507		Quinoa Overrepresented	SimilarPER24: Peroxidase 24 (Arabidopsis thaliana)
AUR62000455	0	Quinoa Specific	Cluster 11559		Quinoa Overrepresented	SimilarAt1g55630: Pentatricopeptide repeat-containing protein At1g55630 (Arabidopsis thaliana)
AUR62000456	0	Quinoa Specific	Cluster 16220		Quinoa Overrepresented	Protein of unknown function
AUR62000457	0	Singleton	N/A			Protein of unknown function
AUR62000458	1	Has Orthologs	Cluster 1004		Quinoa Overrepresented (with Beet)	SimilarAt1g62680: Pentatricopeptide repeat-containing protein At1g62680%2C mitochondrial (Arabidopsis thaliana)
AUR62000459	1	Has Orthologs	Cluster 17850		Quinoa Overrepresented (with Beet)	Protein of unknown function
AUR62000460	0	Has Orthologs	Cluster 5157			SimilarPCMP-H68: Pentatricopeptide repeat-containing protein At1g34160 (Arabidopsis thaliana)
AUR62000461	0	Has Orthologs	Cluster 15144			SimilarSPCC1223.01: E3 ubiquitin-protein ligase hel2 (Schizosaccharomyces pombe (strain 972 / ATCC 24843))
AUR62000462	0	Has Orthologs	Cluster 1004		Quinoa Overrepresented (with Beet)	SimilarAt2g32630: Pentatricopeptide repeat-containing protein At2g32630 (Arabidopsis thaliana)
AUR62000463	0	Has Orthologs	Cluster 1748	Shoot Up		SimilarSAMS4: S-adenosylmethionine synthase 4 (Atriplex nummularia)			563.519	1687.01
AUR62000464	11	Has Orthologs	Cluster 1023			SimilarPDR3: Pleiotropic drug resistance protein 3 (Nicotiana tabacum)
AUR62000465	1	Has Orthologs	Cluster 1409			SimilarAt5g18500: Probable receptor-like protein kinase At5g18500 (Arabidopsis thaliana)
AUR62000466	0	Has Orthologs	Cluster 5342			SimilarGsg2: Serine/threonine-protein kinase haspin (Mus musculus)
AUR62000467	0	Has Orthologs	Cluster 17236			SimilarAt4g34480: Glucan endo-1%2C3-beta-glucosidase 7 (Arabidopsis thaliana)
AUR62000468	0	Has Orthologs	Cluster 5343			Protein of unknown function
AUR62000469	0	Has Orthologs	Cluster 5344			SimilarAt5g64320: Pentatricopeptide repeat-containing protein At5g64320%2C mitochondrial (Arabidopsis thaliana)
AUR62000470	0	Has Orthologs	Cluster 11562			Protein of unknown function
AUR62000471	0	Has Orthologs	Cluster 5345			Protein of unknown function
AUR62000472	0	Has Orthologs	Cluster 5346			SimilarVRN2: Polycomb group protein VERNALIZATION 2 (Arabidopsis thaliana)
AUR62000473	0	Has Orthologs	Cluster 11295			Protein of unknown function
AUR62000474	0	Has Orthologs	Cluster 5347			SimilarCpNIFS3: Probable L-cysteine desulfhydrase%2C chloroplastic (Arabidopsis thaliana)
AUR62000475	1	Has Orthologs	Cluster 4899			Protein of unknown function
AUR62000476	0	Has Orthologs	Cluster 1243			SimilarRAP: Aspartic proteinase (Oryza sativa subsp. japonica)
AUR62000477	0	Has Orthologs	Cluster 1977			Protein of unknown function
AUR62000478	0	Has Orthologs	Cluster 5348			SimilarGpatch8: G patch domain-containing protein 8 (Mus musculus)
AUR62000479	0	Has Orthologs	Cluster 3526			Protein of unknown function
AUR62000480	0	Singleton	N/A			SimilarAPC11: Anaphase-promoting complex subunit 11 (Arabidopsis thaliana)
AUR62000481	1	Singleton	N/A			Protein of unknown function
AUR62000482	0	Has Orthologs	Cluster 11563			SimilarPCMP-H40: Pentatricopeptide repeat-containing protein At1g11290%2C chloroplastic (Arabidopsis thaliana)
AUR62000483	0	Has Orthologs	Cluster 3527			SimilarPIF3: Transcription factor PIF3 (Arabidopsis thaliana)
AUR62000484	0	Has Orthologs	Cluster 2895			SimilarCDC5: Cell division cycle 5-like protein (Arabidopsis thaliana)
AUR62000485	0	Has Orthologs	Cluster 2478			SimilarBifunctional aspartate aminotransferase and glutamate/aspartate-prephenate aminotransferase (Petunia hybrida)
AUR62000486	0	Has Orthologs	Cluster 5349	Shoot Up		SimilarSMU2: Suppressor of mec-8 and unc-52 protein homolog 2 (Arabidopsis thaliana)			6.32019	10.705
AUR62000487	4	Has Orthologs	Cluster 5350			Protein of unknown function
AUR62000488	9	Has Orthologs	Cluster 2822	Shoot Down		SimilarAAPT1: Choline/ethanolaminephosphotransferase 1 (Arabidopsis thaliana)			76.5402	57.5303
AUR62000489	0	Has Orthologs	Cluster 1004		Quinoa Overrepresented (with Beet)	SimilarAt1g62680: Pentatricopeptide repeat-containing protein At1g62680%2C mitochondrial (Arabidopsis thaliana)
AUR62000490	0	Quinoa Specific	Cluster 16221		Quinoa Overrepresented	Protein of unknown function
AUR62000491	1	Has Orthologs	Cluster 2088	Shoot Down		SimilarPAE6: Pectin acetylesterase 6 (Arabidopsis thaliana)			16.5303	7.82974
AUR62000492	0	Quinoa Specific	Cluster 11564		Quinoa Overrepresented	SimilarNAC045: NAC domain-containing protein 45 (Arabidopsis thaliana)
AUR62000493	0	Quinoa Specific	Cluster 11564	Shoot Up	Quinoa Overrepresented	SimilarNAC082: NAC domain-containing protein 82 (Arabidopsis thaliana)			9.33146	15.9632
AUR62000494	0	Has Orthologs	Cluster 5351			SimilarPRL1-IFG: BTB/POZ domain-containing protein At2g13690 (Arabidopsis thaliana)
AUR62000495	1	Has Orthologs	Cluster 2297			SimilarPI4KB1: Phosphatidylinositol 4-kinase beta 1 (Arabidopsis thaliana)
AUR62000496	1	Has Orthologs	Cluster 1103			SimilarAt5g64030: Probable methyltransferase PMT26 (Arabidopsis thaliana)
AUR62000497	0	Has Orthologs	Cluster 11565			SimilarGA20ox1B: Gibberellin 20 oxidase 1-B (Triticum aestivum)
AUR62000498	0	Has Orthologs	Cluster 5352			SimilarRGLG1: E3 ubiquitin-protein ligase RGLG1 (Arabidopsis thaliana)
AUR62000499	0	Has Orthologs	Cluster 5353			SimilarPOLD1: DNA polymerase delta catalytic subunit (Oryza sativa subsp. japonica)
AUR62000500	0	Has Orthologs	Cluster 5354			Protein of unknown function
AUR62000501	0	Has Orthologs	Cluster 5355			SimilarIDM1: Increased DNA methylation 1 (Arabidopsis thaliana)
AUR62000502	0	Has Orthologs	Cluster 17848		Quinoa Overrepresented (with Beet)	Protein of unknown function
AUR62000503	1	Has Orthologs	Cluster 1065			SimilarAt5g63710: Probable LRR receptor-like serine/threonine-protein kinase At5g63710 (Arabidopsis thaliana)
AUR62000504	0	Has Orthologs	Cluster 17847		Quinoa Overrepresented (with Beet)	SimilarDDB_G0268948: Putative methyltransferase DDB_G0268948 (Dictyostelium discoideum)
AUR62000505	2	Has Orthologs	Cluster 11566			Protein of unknown function
AUR62000506	0	Has Orthologs	Cluster 5356			SimilarmnmG: tRNA uridine 5-carboxymethylaminomethyl modification enzyme MnmG (Trichodesmium erythraeum (strain IMS101))
AUR62000507	0	Has Orthologs	Cluster 3528			SimilarCHR24: Protein CHROMATIN REMODELING 24 (Arabidopsis thaliana)
AUR62000508	0	Has Orthologs	Cluster 5357			SimilarAt2g13420: Pentatricopeptide repeat-containing protein At2g13420%2C mitochondrial (Arabidopsis thaliana)
AUR62000509	0	Singleton	N/A			SimilarCHR24: Protein CHROMATIN REMODELING 24 (Arabidopsis thaliana)
AUR62000510	1	Has Orthologs	Cluster 5358			Protein of unknown function
AUR62000511	0	Has Orthologs	Cluster 1950			SimilarPERK1: Proline-rich receptor-like protein kinase PERK1 (Arabidopsis thaliana)
AUR62000512	0	Has Orthologs	Cluster 5359			SimilarTOP3A: DNA topoisomerase 3-alpha (Oryza sativa subsp. japonica)
AUR62000513	0	Has Orthologs	Cluster 13167			SimilarAt5g39450: F-box protein At5g39450 (Arabidopsis thaliana)
AUR62000514	0	Has Orthologs	Cluster 5360			SimilarFLCY: Farnesylcysteine lyase (Arabidopsis thaliana)
AUR62000515	0	Singleton	N/A			Protein of unknown function
AUR62000516	0	Has Orthologs	Cluster 5361			Protein of unknown function
AUR62000517	0	Has Orthologs	Cluster 5362			SimilarKIWI: RNA polymerase II transcriptional coactivator KIWI (Arabidopsis thaliana)
AUR62000518	0	Has Orthologs	Cluster 2844		Quinoa Overrepresented (with Beet)	SimilarHSP22: Small heat shock protein%2C chloroplastic (Fragment) (Glycine max)
AUR62000519	0	Has Orthologs	Cluster 14526	Root Down; Shoot Down		Similarhspc4-1: Small heat shock protein C4 (Rickettsia felis (strain ATCC VR-1525 / URRWXCal2))	32.182	10.6811	33.704	21.1328
AUR62000520	0	Quinoa Specific	Cluster 16222		Quinoa Overrepresented	Protein of unknown function
AUR62000521	0	Singleton	N/A	Shoot Down		Protein of unknown function			33.5259	15.9324
AUR62000522	0	Quinoa Specific	Cluster 16223		Quinoa Overrepresented	SimilarHSP25.3: 25.3 kDa heat shock protein%2C chloroplastic (Arabidopsis thaliana)
AUR62000523	0	Has Orthologs	Cluster 5363			SimilarSRT2: NAD-dependent protein deacylase SRT2 (Arabidopsis thaliana)
AUR62000524	0	Has Orthologs	Cluster 5364			SimilarPPD2: PsbP domain-containing protein 2%2C chloroplastic (Arabidopsis thaliana)
AUR62000525	12	Has Orthologs	Cluster 5365			SimilarBAT1: Amino-acid permease BAT1 homolog (Oryza sativa subsp. japonica)
AUR62000526	0	Has Orthologs	Cluster 5366			SimilarPAD4: Lipase-like PAD4 (Arabidopsis thaliana)
AUR62000527	0	Has Orthologs	Cluster 11567			SimilarREM16: B3 domain-containing protein REM16 (Arabidopsis thaliana)
AUR62000528	0	Has Orthologs	Cluster 3969			SimilarUVR8: Ultraviolet-B receptor UVR8 (Arabidopsis thaliana)
AUR62000529	0	Has Orthologs	Cluster 5367			SimilarAUXI1: Auxilin-related protein 1 (Arabidopsis thaliana)
AUR62000530	9	Has Orthologs	Cluster 1075		Quinoa Overrepresented	SimilarAAP2: Amino acid permease 2 (Arabidopsis thaliana)
AUR62000531	0	Has Orthologs	Cluster 5368			SimilarPSL5: Probable glucan 1%2C3-alpha-glucosidase (Arabidopsis thaliana)
AUR62000532	0	Has Orthologs	Cluster 5369	Shoot Up		SimilarSMU1: Suppressor of mec-8 and unc-52 protein homolog 1 (Arabidopsis thaliana)			13.0691	20.1246
AUR62000533	0	Has Orthologs	Cluster 11296	Shoot Up		Protein of unknown function			69.7155	108.558
AUR62000534	0	Has Orthologs	Cluster 1040		Quinoa Overrepresented	SimilarOs01g0875500: Beta-galactosidase 3 (Oryza sativa subsp. japonica)
AUR62000535	0	Singleton	N/A			SimilarKIN10: SNF1-related protein kinase catalytic subunit alpha KIN10 (Arabidopsis thaliana)
AUR62000536	0	Has Orthologs	Cluster 5370	Root Up; Shoot Up		SimilarNAC002: NAC domain-containing protein 2 (Arabidopsis thaliana)	24.1091	48.0689	11.4108	36.4065
AUR62000537	0	Has Orthologs	Cluster 5371	Shoot Down		SimilarASP1: Aspartic proteinase Asp1 (Oryza sativa subsp. japonica)			8.7306	5.37829
AUR62000538	0	Has Orthologs	Cluster 5372			Protein of unknown function
AUR62000539	0	Has Orthologs	Cluster 2241	Shoot Up		SimilarALDH3I1: Aldehyde dehydrogenase family 3 member I1%2C chloroplastic (Arabidopsis thaliana)			7.64317	16.2641
AUR62000540	0	Singleton	N/A			Protein of unknown function
AUR62000541	0	Has Orthologs	Cluster 1004		Quinoa Overrepresented (with Beet)	SimilarAt3g22470: Pentatricopeptide repeat-containing protein At3g22470%2C mitochondrial (Arabidopsis thaliana)
AUR62000542	0	Has Orthologs	Cluster 1004		Quinoa Overrepresented (with Beet)	SimilarAt1g12700: Putative pentatricopeptide repeat-containing protein At1g12700%2C mitochondrial (Arabidopsis thaliana)
AUR62000543	0	Has Orthologs	Cluster 1888			SimilarAt3g23020: Pentatricopeptide repeat-containing protein At3g23020 (Arabidopsis thaliana)
AUR62000544	3	Has Orthologs	Cluster 5373			Protein of unknown function
AUR62000545	0	Has Orthologs	Cluster 1684			SimilarPDI: Protein disulfide-isomerase (Datisca glomerata)
AUR62000546	0	Has Orthologs	Cluster 5374			SimilarTranscription factor HBP-1b(c38) (Triticum aestivum)
AUR62000547	0	Has Orthologs	Cluster 5375		Quinoa Overrepresented	Protein of unknown function
AUR62000548	0	Has Orthologs	Cluster 5375		Quinoa Overrepresented	SimilarTranscription factor HBP-1b(c1) (Fragment) (Triticum aestivum)
AUR62000549	0	Has Orthologs	Cluster 5376			SimilarCDKE-1: Cyclin-dependent kinase E-1 (Oryza sativa subsp. japonica)
AUR62000550	0	Has Orthologs	Cluster 18038		Quinoa Overrepresented (with Beet)	Protein of unknown function
AUR62000551	0	Has Orthologs	Cluster 5377			SimilarNDC1: Alternative NAD(P)H-ubiquinone oxidoreductase C1%2C chloroplastic/mitochondrial (Arabidopsis thaliana)
AUR62000552	0	Has Orthologs	Cluster 5378			SimilarFAAH: Fatty acid amide hydrolase (Arabidopsis thaliana)
AUR62000553	0	Has Orthologs	Cluster 11375			SimilarCaltractin (Atriplex nummularia)
AUR62000554	0	Has Orthologs	Cluster 3866			SimilarFPP3: Filament-like plant protein 3 (Arabidopsis thaliana)
AUR62000555	1	Has Orthologs	Cluster 3867			SimilarCBSCBSPB3: CBS domain-containing protein CBSCBSPB3 (Arabidopsis thaliana)
AUR62000556	0	Has Orthologs	Cluster 5379			SimilarAt3g51120: Zinc finger CCCH domain-containing protein 44 (Arabidopsis thaliana)
AUR62000557	0	Singleton	N/A			Protein of unknown function
AUR62000558	0	Singleton	N/A			Protein of unknown function
AUR62000559	0	Has Orthologs	Cluster 5380	Shoot Up		Protein of unknown function			2.85291	7.39896
AUR62000560	0	Has Orthologs	Cluster 2896		Quinoa Overrepresented	SimilarAGL62: Agamous-like MADS-box protein AGL62 (Arabidopsis thaliana)
AUR62000561	0	Has Orthologs	Cluster 4179		Quinoa Overrepresented	Protein of unknown function
AUR62000562	1	Has Orthologs	Cluster 1997			SimilarDGK2: Diacylglycerol kinase 2 (Arabidopsis thaliana)
AUR62000563	0	Has Orthologs	Cluster 5381			SimilarUVR8: Ultraviolet-B receptor UVR8 (Arabidopsis thaliana)
AUR62000564	0	Has Orthologs	Cluster 1348			SimilarFBA3: Probable fructose-bisphosphate aldolase 3%2C chloroplastic (Arabidopsis thaliana)
AUR62000565	0	Has Orthologs	Cluster 5382			Similarnep1: Aspartic proteinase nepenthesin-1 (Nepenthes gracilis)
AUR62000566	0	Singleton	N/A			SimilarAt1g10890: Uncharacterized protein At1g10890 (Arabidopsis thaliana)
AUR62000567	0	Singleton	N/A			SimilarAlg13: UDP-N-acetylglucosamine transferase subunit ALG13 homolog (Rattus norvegicus)
AUR62000568	7	Has Orthologs	Cluster 5071			Protein of unknown function
AUR62000569	0	Has Orthologs	Cluster 5383			SimilarCab39: Calcium-binding protein 39 (Mus musculus)
AUR62000570	0	Has Orthologs	Cluster 5384			SimilarAt5g08430: Uncharacterized protein At5g08430 (Arabidopsis thaliana)
AUR62000571	0	Has Orthologs	Cluster 2780	Shoot Up		SimilarEIF5: Eukaryotic translation initiation factor 5 (Phaseolus vulgaris)			53.8259	86.926
AUR62000572	0	Has Orthologs	Cluster 2477			SimilarCDKG-2: Cyclin-dependent kinase G-2 (Oryza sativa subsp. japonica)
AUR62000573	0	Has Orthologs	Cluster 3926			SimilarCCT3: T-complex protein 1 subunit gamma (Arabidopsis thaliana)
AUR62000574	10	Has Orthologs	Cluster 1205		Quinoa Overrepresented (with Beet)	SimilarCLC-C: Chloride channel protein CLC-c (Arabidopsis thaliana)
AUR62000575	0	Has Orthologs	Cluster 5385			Protein of unknown function
AUR62000576	0	Has Orthologs	Cluster 1004		Quinoa Overrepresented (with Beet)	SimilarAt5g65560: Pentatricopeptide repeat-containing protein At5g65560 (Arabidopsis thaliana)
AUR62000577	1	Has Orthologs	Cluster 5386			SimilarCXE18: Probable carboxylesterase 18 (Arabidopsis thaliana)
AUR62000578	0	Has Orthologs	Cluster 1004		Quinoa Overrepresented (with Beet)	SimilarAt1g12700: Putative pentatricopeptide repeat-containing protein At1g12700%2C mitochondrial (Arabidopsis thaliana)
AUR62000579	0	Has Orthologs	Cluster 4180	Shoot Up	Quinoa Overrepresented	SimilarAt2g35130: Pentatricopeptide repeat-containing protein At2g35130 (Arabidopsis thaliana)			6.06728	15.074
AUR62000580	0	Has Orthologs	Cluster 1004		Quinoa Overrepresented (with Beet)	SimilarAt1g63080: Pentatricopeptide repeat-containing protein At1g63080%2C mitochondrial (Arabidopsis thaliana)
AUR62000581	0	Has Orthologs	Cluster 3927			SimilarCNOT11: CCR4-NOT transcription complex subunit 11 (Homo sapiens)
AUR62000582	0	Has Orthologs	Cluster 13168			Protein of unknown function
AUR62000583	0	Has Orthologs	Cluster 5387			SimilarRRN3: RNA polymerase I-specific transcription initiation factor RRN3 (Pongo abelii)
AUR62000584	0	Has Orthologs	Cluster 5388			SimilarMS1: PHD finger protein MALE STERILITY 1 (Arabidopsis thaliana)
AUR62000585	0	Has Orthologs	Cluster 11568			SimilarHarbi1: Putative nuclease HARBI1 (Rattus norvegicus)
AUR62000586	0	Has Orthologs	Cluster 5389			Protein of unknown function
AUR62000587	0	Has Orthologs	Cluster 1036		Quinoa Overrepresented	Protein of unknown function
AUR62000588	0	Quinoa Specific	Cluster 16224		Quinoa Overrepresented	Protein of unknown function
AUR62000589	0	Has Orthologs	Cluster 2508		Quinoa Overrepresented	SimilarRetrovirus-related Pol polyprotein from transposon TNT 1-94 (Nicotiana tabacum)
AUR62000590	0	Quinoa Specific	Cluster 16225		Quinoa Overrepresented	SimilarAtMg00810: Uncharacterized mitochondrial protein AtMg00810 (Arabidopsis thaliana)
AUR62000591	2	Has Orthologs	Cluster 1538		Quinoa Overrepresented	SimilarAt1g67000: Probable receptor-like protein kinase At1g67000 (Arabidopsis thaliana)
AUR62000592	0	Quinoa Specific	Cluster 16226		Quinoa Overrepresented	Protein of unknown function
AUR62000593	0	Quinoa Specific	Cluster 16225		Quinoa Overrepresented	SimilarTY5A: Putative transposon Ty5-1 protein YCL074W (Saccharomyces cerevisiae (strain ATCC 204508 / S288c))
AUR62000594	0	Singleton	N/A			Protein of unknown function
AUR62000595	0	Singleton	N/A			Protein of unknown function
AUR62000596	2	Has Orthologs	Cluster 1538		Quinoa Overrepresented	SimilarAt1g67000: Probable receptor-like protein kinase At1g67000 (Arabidopsis thaliana)
AUR62000597	1	Has Orthologs	Cluster 1538		Quinoa Overrepresented	SimilarAt5g39030: Probable receptor-like protein kinase At5g39030 (Arabidopsis thaliana)
AUR62000598	2	Has Orthologs	Cluster 1538		Quinoa Overrepresented	SimilarAt1g34300: G-type lectin S-receptor-like serine/threonine-protein kinase At1g34300 (Arabidopsis thaliana)
AUR62000599	0	Quinoa Specific	Cluster 16227		Quinoa Overrepresented	Protein of unknown function
AUR62000600	0	Has Orthologs	Cluster 15145			SimilarDODA1: 4%2C5-DOPA dioxygenase extradiol 1 (Beta vulgaris)
AUR62000601	0	Has Orthologs	Cluster 5390			SimilarRKM3: Ribosomal lysine N-methyltransferase 3 (Saccharomyces cerevisiae (strain ATCC 204508 / S288c))
AUR62000602	0	Has Orthologs	Cluster 5391			SimilarDODA: 4%2C5-DOPA dioxygenase extradiol (Beta vulgaris)
AUR62000603	0	Has Orthologs	Cluster 5392	Shoot Down	Quinoa Overrepresented	SimilarLIGB: Extradiol ring-cleavage dioxygenase (Arabidopsis thaliana)			15.1829	3.53384
AUR62000604	0	Quinoa Specific	Cluster 16228		Quinoa Overrepresented	SimilarDODA: 4%2C5-DOPA dioxygenase extradiol (Beta vulgaris)
AUR62000605	5	Has Orthologs	Cluster 5393			SimilarTMEM259: Membralin (Homo sapiens)
AUR62000606	0	Has Orthologs	Cluster 17844		Quinoa Overrepresented (with Beet)	SimilarZHD4: Zinc-finger homeodomain protein 4 (Arabidopsis thaliana)
AUR62000607	3	Singleton	N/A			SimilarSFT2D2: Vesicle transport protein SFT2B (Homo sapiens)
AUR62000608	0	Has Orthologs	Cluster 5394	Root Up		SimilarPER47: Peroxidase 47 (Arabidopsis thaliana)	8.80543	57.1544
AUR62000609	0	Has Orthologs	Cluster 5395			SimilarAt1g33420: PHD finger protein At1g33420 (Arabidopsis thaliana)
AUR62000610	0	Has Orthologs	Cluster 2897			SimilarAt5g08460: GDSL esterase/lipase At5g08460 (Arabidopsis thaliana)
AUR62000611	0	Has Orthologs	Cluster 1004		Quinoa Overrepresented (with Beet)	SimilarAt1g12300: Pentatricopeptide repeat-containing protein At1g12300%2C mitochondrial (Arabidopsis thaliana)
AUR62000612	0	Has Orthologs	Cluster 1535	Root Up	Quinoa Overrepresented (with Beet)	SimilarUGT709C2: 7-deoxyloganetic acid glucosyltransferase (Catharanthus roseus)	5.67128	16.9492
AUR62000613	0	Quinoa Specific	Cluster 16229		Quinoa Overrepresented	Protein of unknown function
AUR62000614	1	Singleton	N/A			Protein of unknown function
AUR62000615	4	Has Orthologs	Cluster 5396			Similarclptm1: Cleft lip and palate transmembrane protein 1 homolog (Danio rerio)
AUR62000616	0	Has Orthologs	Cluster 4181		Quinoa Overrepresented	SimilarSGS3: Protein SUPPRESSOR OF GENE SILENCING 3 (Solanum lycopersicum)
AUR62000617	0	Singleton	N/A			SimilarAt5g16640: Pentatricopeptide repeat-containing protein At5g16640%2C mitochondrial (Arabidopsis thaliana)
AUR62000618	0	Singleton	N/A			Protein of unknown function
AUR62000619	0	Has Orthologs	Cluster 1004		Quinoa Overrepresented (with Beet)	SimilarAt1g12700: Putative pentatricopeptide repeat-containing protein At1g12700%2C mitochondrial (Arabidopsis thaliana)
AUR62000620	0	Has Orthologs	Cluster 1004		Quinoa Overrepresented (with Beet)	SimilarAt2g01390/At2g01380: Pentatricopeptide repeat-containing protein At2g01390 (Arabidopsis thaliana)
AUR62000621	0	Has Orthologs	Cluster 1004		Quinoa Overrepresented (with Beet)	SimilarAt5g16640: Pentatricopeptide repeat-containing protein At5g16640%2C mitochondrial (Arabidopsis thaliana)
AUR62000622	0	Has Orthologs	Cluster 1004		Quinoa Overrepresented (with Beet)	SimilarAt1g12700: Putative pentatricopeptide repeat-containing protein At1g12700%2C mitochondrial (Arabidopsis thaliana)
AUR62000623	0	Has Orthologs	Cluster 5397			SimilarACOT13: Acyl-coenzyme A thioesterase 13 (Pongo abelii)
AUR62000624	0	Has Orthologs	Cluster 1012		Quinoa Overrepresented	SimilarCalcium-dependent protein kinase SK5 (Glycine max)
AUR62000625	0	Has Orthologs	Cluster 5398			SimilarSUVR2: Probable inactive histone-lysine N-methyltransferase SUVR2 (Arabidopsis thaliana)
AUR62000626	1	Has Orthologs	Cluster 5399			SimilarCRRSP39: Cysteine-rich repeat secretory protein 39 (Arabidopsis thaliana)
AUR62000627	0	Has Orthologs	Cluster 13169			Protein of unknown function
AUR62000628	0	Has Orthologs	Cluster 1259	Shoot Down		Protein of unknown function			8.36069	3.65398
AUR62000629	0	Has Orthologs	Cluster 5400			SimilarATRX: Protein CHROMATIN REMODELING 20 (Arabidopsis thaliana)
AUR62000630	2	Has Orthologs	Cluster 5401			SimilarFTSHI5: Probable inactive ATP-dependent zinc metalloprotease FTSHI 5%2C chloroplastic (Arabidopsis thaliana)
AUR62000631	2	Has Orthologs	Cluster 1001			SimilarPXL1: Leucine-rich repeat receptor-like protein kinase PXL1 (Arabidopsis thaliana)
AUR62000632	0	Has Orthologs	Cluster 3905			SimilarTNEA_C: Probable aminopyrimidine aminohydrolase%2C mitochondrial (Arabidopsis thaliana)
AUR62000633	2	Has Orthologs	Cluster 5402			Protein of unknown function
AUR62000634	11	Has Orthologs	Cluster 1194	Root Down		SimilarAMT1-2: Ammonium transporter 1 member 2 (Solanum lycopersicum)	72.8049	34.1411
AUR62000635	11	Has Orthologs	Cluster 1194	Shoot Down		SimilaramtC: Ammonium transporter 3 (Dictyostelium discoideum)			13.6462	3.33973
AUR62000636	1	Has Orthologs	Cluster 5403			SimilarEXOSC1: Exosome complex component CSL4 (Homo sapiens)
AUR62000637	1	Has Orthologs	Cluster 5404	Shoot Down		Protein of unknown function			9.97423	5.12427
AUR62000638	0	Has Orthologs	Cluster 5405			SimilarGCN1L1: Translational activator GCN1 (Homo sapiens)
AUR62000639	1	Has Orthologs	Cluster 14527			SimilarAt5g33370: GDSL esterase/lipase At5g33370 (Arabidopsis thaliana)
AUR62000640	0	Has Orthologs	Cluster 5406			Protein of unknown function
AUR62000641	0	Has Orthologs	Cluster 13170			Protein of unknown function
AUR62000642	0	Has Orthologs	Cluster 5407			SimilarPIR: Protein PIR (Arabidopsis thaliana)
AUR62000643	1	Has Orthologs	Cluster 1001			SimilarAt5g63930: Probable leucine-rich repeat receptor-like protein kinase At5g63930 (Arabidopsis thaliana)
AUR62000644	0	Has Orthologs	Cluster 2262	Shoot Up		SimilarSEC: Probable UDP-N-acetylglucosamine--peptide N-acetylglucosaminyltransferase SEC (Arabidopsis thaliana)			3.75917	6.49918
AUR62000645	0	Has Orthologs	Cluster 4182			SimilarAt5g18390: Pentatricopeptide repeat-containing protein At5g18390%2C mitochondrial (Arabidopsis thaliana)
AUR62000646	0	Has Orthologs	Cluster 1004		Quinoa Overrepresented (with Beet)	SimilarAt1g62720: Pentatricopeptide repeat-containing protein At1g62720 (Arabidopsis thaliana)
AUR62000647	0	Has Orthologs	Cluster 13171			SimilarTAF12B: Transcription initiation factor TFIID subunit 12b (Arabidopsis thaliana)
AUR62000648	0	Singleton	N/A			Protein of unknown function
AUR62000649	0	Has Orthologs	Cluster 1004		Quinoa Overrepresented (with Beet)	SimilarAt1g12700: Putative pentatricopeptide repeat-containing protein At1g12700%2C mitochondrial (Arabidopsis thaliana)
AUR62000650	0	Has Orthologs	Cluster 1004		Quinoa Overrepresented (with Beet)	SimilarAt2g06000: Pentatricopeptide repeat-containing protein At2g06000 (Arabidopsis thaliana)
AUR62000651	0	Singleton	N/A			Protein of unknown function
AUR62000652	0	Has Orthologs	Cluster 1004		Quinoa Overrepresented (with Beet)	SimilarAt3g09060: Pentatricopeptide repeat-containing protein At3g09060 (Arabidopsis thaliana)
AUR62000653	0	Has Orthologs	Cluster 5112		Quinoa Overrepresented (with Beet)	SimilarFLS: Flavonol synthase/flavanone 3-hydroxylase (Citrus unshiu)
AUR62000654	9	Has Orthologs	Cluster 2509			SimilarPUP11: Probable purine permease 11 (Arabidopsis thaliana)
AUR62000655	0	Has Orthologs	Cluster 5408			SimilarPUB9: U-box domain-containing protein 9 (Arabidopsis thaliana)
AUR62000656	0	Has Orthologs	Cluster 5409			Protein of unknown function
AUR62000657	0	Has Orthologs	Cluster 11569			Protein of unknown function
AUR62000658	1	Has Orthologs	Cluster 13172			Protein of unknown function
AUR62000659	7	Has Orthologs	Cluster 11570			SimilarNEC1: Bidirectional sugar transporter NEC1 (Petunia hybrida)
AUR62000660	0	Has Orthologs	Cluster 5410	Shoot Up		SimilarVDE1: Violaxanthin de-epoxidase%2C chloroplastic (Spinacia oleracea)			39.7463	53.9932
AUR62000661	0	Has Orthologs	Cluster 11571			SimilarAt3g07070: Serine/threonine-protein kinase At3g07070 (Arabidopsis thaliana)
AUR62000662	0	Singleton	N/A			SimilarAt2g23090: Uncharacterized protein At2g23090 (Arabidopsis thaliana)
AUR62000663	0	Has Orthologs	Cluster 5411	Shoot Up		SimilarPP2B12: Putative F-box protein PP2-B12 (Arabidopsis thaliana)			10.0443	19.2646
AUR62000664	0	Quinoa Specific	Cluster 16230		Quinoa Overrepresented	SimilarPP2B15: F-box protein PP2-B15 (Arabidopsis thaliana)
AUR62000665	0	Has Orthologs	Cluster 1004		Quinoa Overrepresented (with Beet)	SimilarAt4g38150: Pentatricopeptide repeat-containing protein At4g38150 (Arabidopsis thaliana)
AUR62000666	0	Has Orthologs	Cluster 1004		Quinoa Overrepresented (with Beet)	SimilarAt1g12700: Putative pentatricopeptide repeat-containing protein At1g12700%2C mitochondrial (Arabidopsis thaliana)
AUR62000667	0	Singleton	N/A			Protein of unknown function
AUR62000668	0	Singleton	N/A			SimilarAt1g26460: Pentatricopeptide repeat-containing protein At1g26460%2C mitochondrial (Arabidopsis thaliana)
AUR62000669	0	Singleton	N/A			Protein of unknown function
AUR62000670	0	Has Orthologs	Cluster 11519		Quinoa Overrepresented (with Beet)	Protein of unknown function
AUR62000671	0	Has Orthologs	Cluster 5412			SimilarPRFB2: Peptide chain release factor PrfB2%2C chloroplastic (Arabidopsis thaliana)
AUR62000672	0	Has Orthologs	Cluster 5413			SimilarAt1g56345: RNA pseudouridine synthase 1 (Arabidopsis thaliana)
AUR62000673	0	Singleton	N/A	Shoot Down		SimilarCalreticulin (Beta vulgaris)			193.632	127.018
AUR62000674	0	Has Orthologs	Cluster 5414			SimilarAt3g01520: Universal stress protein A-like protein (Arabidopsis thaliana)
AUR62000675	0	Singleton	N/A			SimilarMFDX2: Adrenodoxin-like protein 2%2C mitochondrial (Arabidopsis thaliana)
AUR62000676	0	Has Orthologs	Cluster 5415			SimilarSAR1A: GTP-binding protein SAR1A (Arabidopsis thaliana)
AUR62000677	0	Singleton	N/A			SimilarAtMg00810: Uncharacterized mitochondrial protein AtMg00810 (Arabidopsis thaliana)
AUR62000678	0	Has Orthologs	Cluster 1004		Quinoa Overrepresented (with Beet)	SimilarAt1g63130: Pentatricopeptide repeat-containing protein At1g63130%2C mitochondrial (Arabidopsis thaliana)
AUR62000679	0	Has Orthologs	Cluster 1004		Quinoa Overrepresented (with Beet)	SimilarCCM1: Mitochondrial group I intron splicing factor CCM1 (Yarrowia lipolytica (strain CLIB 122 / E 150))
AUR62000680	0	Singleton	N/A			Protein of unknown function
AUR62000681	0	Has Orthologs	Cluster 11572			Protein of unknown function
AUR62000682	0	Has Orthologs	Cluster 5416			SimilarPCMP-E70: Pentatricopeptide repeat-containing protein At1g09190 (Arabidopsis thaliana)
AUR62000683	0	Has Orthologs	Cluster 13173			SimilarZmat2: Zinc finger matrin-type protein 2 (Mus musculus)
AUR62000684	1	Has Orthologs	Cluster 5417	Shoot Down		SimilarProbable protein disulfide-isomerase A6 (Medicago sativa)			68.8394	45.8303
AUR62000685	0	Quinoa Specific	Cluster 1106		Quinoa Overrepresented	Protein of unknown function
AUR62000686	0	Quinoa Specific	Cluster 1337		Quinoa Overrepresented	Protein of unknown function
AUR62000687	0	Singleton	N/A			Protein of unknown function
AUR62000688	0	Has Orthologs	Cluster 5418			Protein of unknown function
AUR62000689	0	Has Orthologs	Cluster 5419			SimilarRECQL1: ATP-dependent DNA helicase Q-like 1 (Arabidopsis thaliana)
AUR62000690	0	Has Orthologs	Cluster 1004		Quinoa Overrepresented (with Beet)	SimilarMEE40: Pentatricopeptide repeat-containing protein At3g53700%2C chloroplastic (Arabidopsis thaliana)
AUR62000691	0	Has Orthologs	Cluster 1004		Quinoa Overrepresented (with Beet)	SimilarPCMP-E17: Pentatricopeptide repeat-containing protein At4g14170 (Arabidopsis thaliana)
AUR62000692	0	Has Orthologs	Cluster 1004		Quinoa Overrepresented (with Beet)	SimilarAt1g12700: Putative pentatricopeptide repeat-containing protein At1g12700%2C mitochondrial (Arabidopsis thaliana)
AUR62000693	0	Has Orthologs	Cluster 5420			Protein of unknown function
AUR62000694	0	Has Orthologs	Cluster 5421			Similarppx: Exopolyphosphatase (Vibrio cholerae serotype O1 (strain ATCC 39315 / El Tor Inaba N16961))
AUR62000695	0	Has Orthologs	Cluster 5422			SimilarCBP60D: Calmodulin-binding protein 60 D (Arabidopsis thaliana)
AUR62000696	0	Has Orthologs	Cluster 2898			SimilarCBP60C: Calmodulin-binding protein 60 C (Arabidopsis thaliana)
AUR62000697	0	Has Orthologs	Cluster 2733			Protein of unknown function
AUR62000698	0	Has Orthologs	Cluster 1004		Quinoa Overrepresented (with Beet)	SimilarAt1g18900: Pentatricopeptide repeat-containing protein At1g18900 (Arabidopsis thaliana)
AUR62000699	0	Singleton	N/A			Protein of unknown function
AUR62000700	0	Has Orthologs	Cluster 1004		Quinoa Overrepresented (with Beet)	SimilarRf1: Protein Rf1%2C mitochondrial (Oryza sativa subsp. indica)
AUR62000701	0	Has Orthologs	Cluster 5423	Shoot Up		SimilarABCF5: ABC transporter F family member 5 (Arabidopsis thaliana)			20.2776	41.5679
AUR62000702	0	Has Orthologs	Cluster 5424			SimilarPhrf1: PHD and RING finger domain-containing protein 1 (Mus musculus)
AUR62000703	0	Has Orthologs	Cluster 5425			SimilarDI19-6: Protein DEHYDRATION-INDUCED 19 homolog 6 (Arabidopsis thaliana)
AUR62000704	0	Singleton	N/A			SimilarSYP43: Syntaxin-43 (Arabidopsis thaliana)
AUR62000705	0	Has Orthologs	Cluster 5426			SimilarDPD1: Exonuclease DPD1%2C chloroplastic/mitochondrial (Arabidopsis thaliana)
AUR62000706	0	Has Orthologs	Cluster 5427	Shoot Up		SimilarRPI2: Probable ribose-5-phosphate isomerase 2 (Arabidopsis thaliana)			44.6146	93.2647
AUR62000707	0	Has Orthologs	Cluster 5428			SimilarDNAJB6: DnaJ homolog subfamily B member 6 (Macaca fascicularis)
AUR62000708	0	Singleton	N/A			Protein of unknown function
AUR62000709	0	Singleton	N/A			Protein of unknown function
AUR62000710	0	Has Orthologs	Cluster 1004		Quinoa Overrepresented (with Beet)	SimilarAt3g22470: Pentatricopeptide repeat-containing protein At3g22470%2C mitochondrial (Arabidopsis thaliana)
AUR62000711	0	Singleton	N/A			SimilarLrpprc: Leucine-rich PPR motif-containing protein%2C mitochondrial (Mus musculus)
AUR62000712	0	Has Orthologs	Cluster 1004		Quinoa Overrepresented (with Beet)	SimilarAt1g63130: Pentatricopeptide repeat-containing protein At1g63130%2C mitochondrial (Arabidopsis thaliana)
AUR62000713	0	Has Orthologs	Cluster 5429			Protein of unknown function
AUR62000714	0	Has Orthologs	Cluster 1151			SimilarATK4: Kinesin-4 (Arabidopsis thaliana)
AUR62000715	0	Has Orthologs	Cluster 2188			SimilarAt1g09160: Probable protein phosphatase 2C 5 (Arabidopsis thaliana)
AUR62000716	0	Has Orthologs	Cluster 1004		Quinoa Overrepresented (with Beet)	SimilarAt2g02150: Putative pentatricopeptide repeat-containing protein At2g02150 (Arabidopsis thaliana)
AUR62000717	0	Has Orthologs	Cluster 3735			SimilarAGL80: Agamous-like MADS-box protein AGL80 (Arabidopsis thaliana)
AUR62000718	0	Singleton	N/A			SimilarAt4g11060: Single-stranded DNA-binding protein%2C mitochondrial (Arabidopsis thaliana)
AUR62000719	0	Has Orthologs	Cluster 2392		Quinoa Overrepresented	SimilarTIF3A1: Eukaryotic translation initiation factor 3 subunit A (Nicotiana tabacum)
AUR62000720	0	Has Orthologs	Cluster 11573			Protein of unknown function
AUR62000721	0	Singleton	N/A			SimilarPRP38: Pre-mRNA-splicing factor 38 (Arabidopsis thaliana)
AUR62000722	0	Has Orthologs	Cluster 1362		Quinoa Overrepresented	SimilarTPR3: Topless-related protein 3 (Arabidopsis thaliana)
AUR62000723	0	Has Orthologs	Cluster 5430			SimilarTHO7B: THO complex subunit 7B (Arabidopsis thaliana)
AUR62000724	0	Has Orthologs	Cluster 5431			SimilarPPC6-7: Probable protein phosphatase 2C 73 (Arabidopsis thaliana)
AUR62000725	0	Has Orthologs	Cluster 1833			SimilarPLDZETA1: Phospholipase D zeta 1 (Arabidopsis thaliana)
AUR62000726	0	Has Orthologs	Cluster 13174			Protein of unknown function
AUR62000727	0	Has Orthologs	Cluster 11574	Shoot Down		SimilarRPL19B: 60S ribosomal protein L19-2 (Arabidopsis thaliana)			175.265	126.569
AUR62000728	0	Has Orthologs	Cluster 11395			SimilarPP2B15: F-box protein PP2-B15 (Arabidopsis thaliana)
AUR62000729	0	Has Orthologs	Cluster 2273			SimilarGDPD6: Glycerophosphodiester phosphodiesterase GDPD6 (Arabidopsis thaliana)
AUR62000730	0	Has Orthologs	Cluster 5432			Protein of unknown function
AUR62000731	0	Has Orthologs	Cluster 2178			SimilarLIP1P: Lipoyl synthase%2C chloroplastic (Ricinus communis)
AUR62000732	0	Quinoa Specific	Cluster 14524		Quinoa Overrepresented	SimilarRf1: Protein Rf1%2C mitochondrial (Oryza sativa subsp. indica)
AUR62000733	0	Has Orthologs	Cluster 5433			SimilarGRDP1: Glycine-rich domain-containing protein 1 (Arabidopsis thaliana)
AUR62000734	0	Has Orthologs	Cluster 1281			SimilarFBL3: F-box/LRR-repeat protein 3 (Arabidopsis thaliana)
AUR62000735	0	Has Orthologs	Cluster 1281	Root Down		SimilarPME22: Putative pectinesterase/pectinesterase inhibitor 22 (Arabidopsis thaliana)	5.09291	1.79289
AUR62000736	1	Has Orthologs	Cluster 1281			SimilarPME21: Probable pectinesterase/pectinesterase inhibitor 21 (Arabidopsis thaliana)
AUR62000737	0	Has Orthologs	Cluster 14340			Protein of unknown function
AUR62000738	0	Has Orthologs	Cluster 3609			SimilarEPHX2: Bifunctional epoxide hydrolase 2 (Homo sapiens)
AUR62000739	0	Has Orthologs	Cluster 4987			SimilarRPL18B: 60S ribosomal protein L18-2 (Arabidopsis thaliana)
AUR62000740	1	Has Orthologs	Cluster 2105	Root Down	Quinoa Overrepresented (with Beet)	SimilarCRK7: Cysteine-rich receptor-like protein kinase 7 (Arabidopsis thaliana)	4.59805	1.45822
AUR62000741	2	Singleton	N/A			SimilarGLR2.5: Glutamate receptor 2.5 (Arabidopsis thaliana)
AUR62000742	2	Singleton	N/A			Similarmcts1: Malignant T-cell-amplified sequence 1 homolog (Dictyostelium discoideum)
AUR62000743	6	Has Orthologs	Cluster 14528			SimilarSWEET17: Bidirectional sugar transporter SWEET17 (Arabidopsis thaliana)
AUR62000744	0	Has Orthologs	Cluster 4988			SimilarTOPP9: Serine/threonine-protein phosphatase PP1 isozyme 9 (Arabidopsis thaliana)
AUR62000745	1	Has Orthologs	Cluster 5434			Protein of unknown function
AUR62000746	0	Has Orthologs	Cluster 1099		Quinoa Overrepresented	SimilarRetrovirus-related Pol polyprotein from transposon TNT 1-94 (Nicotiana tabacum)
AUR62000747	0	Has Orthologs	Cluster 1099		Quinoa Overrepresented	Protein of unknown function
AUR62000748	0	Has Orthologs	Cluster 1089		Quinoa Overrepresented	SimilarGIP: Copia protein (Drosophila melanogaster)
AUR62000749	0	Has Orthologs	Cluster 2899		Quinoa Overrepresented	Protein of unknown function
AUR62000750	0	Has Orthologs	Cluster 2899		Quinoa Overrepresented	Protein of unknown function
AUR62000751	0	Has Orthologs	Cluster 2691			SimilarrplR: 50S ribosomal protein L18 (Xanthobacter autotrophicus (strain ATCC BAA-1158 / Py2))
AUR62000752	1	Has Orthologs	Cluster 13176			SimilarKCS7: 3-ketoacyl-CoA synthase 7 (Arabidopsis thaliana)
AUR62000753	0	Has Orthologs	Cluster 5435			SimilarAAE: Acetylajmalan esterase (Rauvolfia serpentina)
AUR62000754	0	Has Orthologs	Cluster 13175			Protein of unknown function
AUR62000755	0	Has Orthologs	Cluster 5436	Shoot Up		SimilarSR30: Serine/arginine-rich splicing factor SR30 (Arabidopsis thaliana)			11.8522	19.1966
AUR62000756	0	Has Orthologs	Cluster 5437			Protein of unknown function
AUR62000757	0	Has Orthologs	Cluster 3610			SimilarTCTP: Translationally-controlled tumor protein homolog (Hordeum vulgare)
AUR62000758	0	Has Orthologs	Cluster 2708			SimilarTBP1: 26S protease regulatory subunit 6A homolog (Brassica campestris)
AUR62000759	9	Has Orthologs	Cluster 5438			SimilarHgsnat: Heparan-alpha-glucosaminide N-acetyltransferase (Mus musculus)
AUR62000760	0	Has Orthologs	Cluster 1004		Quinoa Overrepresented (with Beet)	SimilarAt1g12700: Putative pentatricopeptide repeat-containing protein At1g12700%2C mitochondrial (Arabidopsis thaliana)
AUR62000761	0	Has Orthologs	Cluster 5439			SimilarAt5g43820: Putative pentatricopeptide repeat-containing protein At5g43820 (Arabidopsis thaliana)
AUR62000762	0	Has Orthologs	Cluster 5440			SimilarAt3g05520: F-actin-capping protein subunit alpha (Arabidopsis thaliana)
AUR62000763	0	Has Orthologs	Cluster 5441			SimilarTAZ: Tafazzin (Macaca mulatta)
AUR62000764	0	Has Orthologs	Cluster 13177			Protein of unknown function
AUR62000765	0	Has Orthologs	Cluster 5442			SimilarCLPR3: ATP-dependent Clp protease proteolytic subunit-related protein 3%2C chloroplastic (Arabidopsis thaliana)
AUR62000766	0	Has Orthologs	Cluster 5443	Root Up		SimilarSRP: Stress-related protein (Vitis riparia)	88.2891	177.397
AUR62000767	0	Has Orthologs	Cluster 2900		Quinoa Overrepresented	SimilarVIT_01s0010g01180: Anamorsin homolog (Vitis vinifera)
AUR62000768	1	Has Orthologs	Cluster 5444	Shoot Down		SimilarRALF1: Protein RALF-like 1 (Arabidopsis thaliana)			131.427	85.779
AUR62000769	0	Has Orthologs	Cluster 4990			SimilarRALFL19: Protein RALF-like 19 (Arabidopsis thaliana)
AUR62000770	0	Has Orthologs	Cluster 5445			SimilarRad9a: Cell cycle checkpoint control protein RAD9A (Mus musculus)
AUR62000771	0	Has Orthologs	Cluster 15146			SimilarPCMP-H61: Pentatricopeptide repeat-containing protein At5g66520 (Arabidopsis thaliana)
AUR62000772	0	Quinoa Specific	Cluster 16232		Quinoa Overrepresented	Protein of unknown function
AUR62000773	1	Has Orthologs	Cluster 5446			SimilarDesiccation-related protein PCC13-62 (Craterostigma plantagineum)
AUR62000774	0	Has Orthologs	Cluster 5447			SimilarATX1: Copper transport protein ATX1 (Arabidopsis thaliana)
AUR62000775	4	Has Orthologs	Cluster 1203	Shoot Down		SimilarRBOHB: Respiratory burst oxidase homolog protein B (Solanum tuberosum)			19.5659	6.9261
AUR62000776	1	Has Orthologs	Cluster 5448			SimilarFH11: Formin-like protein 11 (Arabidopsis thaliana)
AUR62000777	1	Has Orthologs	Cluster 14529			SimilarBIP8: Luminal-binding protein 8 (Fragment) (Nicotiana tabacum)
AUR62000778	0	Has Orthologs	Cluster 5449			SimilarRECQSIM: ATP-dependent DNA helicase Q-like SIM (Arabidopsis thaliana)
AUR62000779	0	Has Orthologs	Cluster 4168	Root Up	Quinoa Overrepresented	SimilarCCR1: Cinnamoyl-CoA reductase 1 (Arabidopsis thaliana)	2.96728	8.64002
AUR62000780	0	Singleton	N/A			SimilarCCR1: Cinnamoyl-CoA reductase 1 (Arabidopsis thaliana)
AUR62000781	0	Has Orthologs	Cluster 4183	Root Down		SimilarTKPR1: Tetraketide alpha-pyrone reductase 1 (Arabidopsis thaliana)	48.5978	27.2904
AUR62000782	0	Singleton	N/A			SimilarHistone H2A.1 (Solanum lycopersicum)
AUR62000783	0	Has Orthologs	Cluster 5450			SimilarDEGP14: Putative protease Do-like 14 (Arabidopsis thaliana)
AUR62000784	0	Has Orthologs	Cluster 11575			SimilarATG18A: Autophagy-related protein 18a (Arabidopsis thaliana)
AUR62000785	0	Singleton	N/A			Protein of unknown function
AUR62000786	0	Singleton	N/A			Protein of unknown function
AUR62000787	0	Has Orthologs	Cluster 2901		Quinoa Overrepresented	Protein of unknown function
AUR62000788	0	Has Orthologs	Cluster 2901		Quinoa Overrepresented	SimilarGlyr1: Putative oxidoreductase GLYR1 (Rattus norvegicus)
AUR62000789	0	Has Orthologs	Cluster 11576			SimilarACBP4: Acyl-CoA-binding domain-containing protein 4 (Arabidopsis thaliana)
AUR62000790	0	Singleton	N/A			SimilarDEADC1: tRNA-specific adenosine deaminase 2 (Bos taurus)
AUR62000791	0	Has Orthologs	Cluster 11577			Protein of unknown function
AUR62000792	0	Has Orthologs	Cluster 3941			SimilarJMJ25: Lysine-specific demethylase JMJ25 (Arabidopsis thaliana)
AUR62000793	1	Has Orthologs	Cluster 5451			SimilarPPD7: PsbP domain-containing protein 7%2C chloroplastic (Arabidopsis thaliana)
AUR62000794	0	Has Orthologs	Cluster 13178			SimilarGINS1: DNA replication complex GINS protein PSF1 (Homo sapiens)
AUR62000795	0	Has Orthologs	Cluster 1069		Quinoa Overrepresented	SimilarRpA-70: Replication protein A 70 kDa DNA-binding subunit (Drosophila melanogaster)
AUR62000796	0	Has Orthologs	Cluster 5452	Root Down; Shoot Down		Protein of unknown function	3.25088	1.25414	3.12119	1.46134
AUR62000797	1	Has Orthologs	Cluster 3942			Protein of unknown function
AUR62000798	0	Has Orthologs	Cluster 5453			SimilarRPS15AE: 40S ribosomal protein S15a-5 (Arabidopsis thaliana)
AUR62000799	0	Has Orthologs	Cluster 5454	Shoot Up		SimilarCXIP4: CAX-interacting protein 4 (Arabidopsis thaliana)			37.0055	56.8062
AUR62000800	0	Has Orthologs	Cluster 5455			SimilarNFYB4: Nuclear transcription factor Y subunit B-4 (Arabidopsis thaliana)
AUR62000801	0	Has Orthologs	Cluster 1060		Quinoa Overrepresented	SimilarRetrovirus-related Pol polyprotein from transposon TNT 1-94 (Nicotiana tabacum)
AUR62000802	0	Has Orthologs	Cluster 13179			Protein of unknown function
AUR62000803	0	Has Orthologs	Cluster 5456			SimilarCYCH1-1: Cyclin-H1-1 (Arabidopsis thaliana)
AUR62000804	0	Has Orthologs	Cluster 5457			SimilarSDS: Cyclin-SDS (Arabidopsis thaliana)
AUR62000805	0	Has Orthologs	Cluster 5458			SimilarCUL1: Cullin-1 (Arabidopsis thaliana)
AUR62000806	0	Has Orthologs	Cluster 4089			Protein of unknown function
AUR62000807	0	Has Orthologs	Cluster 3943			SimilarSNF4: Sucrose nonfermenting 4-like protein (Arabidopsis thaliana)
AUR62000808	0	Has Orthologs	Cluster 2119			SimilarALY1: Protein ALWAYS EARLY 1 (Arabidopsis thaliana)
AUR62000809	0	Has Orthologs	Cluster 15147			Protein of unknown function
AUR62000810	0	Has Orthologs	Cluster 5459			SimilarVAR3: Zinc finger protein VAR3%2C chloroplastic (Arabidopsis thaliana)
AUR62000811	0	Has Orthologs	Cluster 5460			SimilarREV3: DNA polymerase zeta catalytic subunit (Arabidopsis thaliana)
AUR62000812	0	Has Orthologs	Cluster 1039		Quinoa Overrepresented (with Beet)	SimilarLOX1.5: Probable linoleate 9S-lipoxygenase 5 (Solanum tuberosum)
AUR62000813	0	Has Orthologs	Cluster 1089		Quinoa Overrepresented	SimilarRetrovirus-related Pol polyprotein from transposon TNT 1-94 (Nicotiana tabacum)
AUR62000814	0	Has Orthologs	Cluster 1039		Quinoa Overrepresented (with Beet)	SimilarALOX5: Arachidonate 5-lipoxygenase (Mesocricetus auratus)
AUR62000815	0	Has Orthologs	Cluster 1039		Quinoa Overrepresented (with Beet)	SimilarLinoleate 9S-lipoxygenase (Fragment) (Phaseolus vulgaris)
AUR62000816	0	Has Orthologs	Cluster 1039	Root Down	Quinoa Overrepresented (with Beet)	SimilarLOX1.5: Probable linoleate 9S-lipoxygenase 5 (Solanum tuberosum)	16.2537	2.83067
AUR62000817	0	Has Orthologs	Cluster 1076		Quinoa Overrepresented	Protein of unknown function
AUR62000818	0	Singleton	N/A			SimilarAt5g44260: Zinc finger CCCH domain-containing protein 61 (Arabidopsis thaliana)
AUR62000819	0	Has Orthologs	Cluster 5461	Shoot Up		SimilarAt1g55000: F-box protein At1g55000 (Arabidopsis thaliana)			10.3404	17.8517
AUR62000820	0	Has Orthologs	Cluster 5462			SimilarAXR4: Protein AUXIN RESPONSE 4 (Arabidopsis thaliana)
AUR62000821	0	Has Orthologs	Cluster 2120	Shoot Up		Similarampp: Probable Xaa-Pro aminopeptidase P (Emericella nidulans (strain FGSC A4 / ATCC 38163 / CBS 112.46 / NRRL 194 / M139))			6.99059	10.3377
AUR62000822	0	Has Orthologs	Cluster 4184		Quinoa Overrepresented	SimilarlcfB: Long-chain-fatty-acid--CoA ligase (Bacillus subtilis (strain 168))
AUR62000823	0	Has Orthologs	Cluster 4184		Quinoa Overrepresented	SimilarLACS7: Long chain acyl-CoA synthetase 7%2C peroxisomal (Arabidopsis thaliana)
AUR62000824	1	Singleton	N/A			Protein of unknown function
AUR62000825	0	Has Orthologs	Cluster 2377	Shoot Down	Quinoa Overrepresented	SimilarSDH1-1: Succinate dehydrogenase [ubiquinone] flavoprotein subunit 1%2C mitochondrial (Arabidopsis thaliana)			15.3248	10.0813
AUR62000826	0	Has Orthologs	Cluster 13180			SimilarPCMP-E83: Pentatricopeptide repeat-containing protein At3g05340 (Arabidopsis thaliana)
AUR62000827	0	Has Orthologs	Cluster 5463			SimilarEBM: Mannosylglycoprotein endo-beta-mannosidase (Lilium longiflorum)
AUR62000828	0	Has Orthologs	Cluster 5464			Protein of unknown function
AUR62000829	0	Has Orthologs	Cluster 5465	Shoot Down		SimilarATK4: Kinesin-4 (Arabidopsis thaliana)			8.11581	5.32375
AUR62000830	0	Has Orthologs	Cluster 5466			SimilarTAN: Probable microtubule-binding protein TANGLED (Arabidopsis thaliana)
AUR62000831	1	Has Orthologs	Cluster 1832			Protein of unknown function
AUR62000832	0	Has Orthologs	Cluster 1832			SimilarGUX4: Putative UDP-glucuronate:xylan alpha-glucuronosyltransferase 4 (Arabidopsis thaliana)
AUR62000833	0	Singleton	N/A	Shoot Up		Protein of unknown function			4.43328	6.71084
AUR62000834	0	Has Orthologs	Cluster 5467			SimilarCYCP3-1: Cyclin-P3-1 (Oryza sativa subsp. japonica)
AUR62000835	1	Has Orthologs	Cluster 3678			SimilarMIRO1: Mitochondrial Rho GTPase 1 (Arabidopsis thaliana)
AUR62000836	0	Has Orthologs	Cluster 1089		Quinoa Overrepresented	SimilarRetrovirus-related Pol polyprotein from transposon TNT 1-94 (Nicotiana tabacum)
AUR62000837	0	Has Orthologs	Cluster 5468			Protein of unknown function
AUR62000838	0	Has Orthologs	Cluster 5469			SimilarAt3g06035: Uncharacterized GPI-anchored protein At3g06035 (Arabidopsis thaliana)
AUR62000839	0	Has Orthologs	Cluster 2264			SimilarAt1g54870: Glucose and ribitol dehydrogenase homolog 1 (Arabidopsis thaliana)
AUR62000840	0	Has Orthologs	Cluster 2264			SimilaryhxC: Uncharacterized oxidoreductase YhxC (Bacillus subtilis (strain 168))
AUR62000841	0	Has Orthologs	Cluster 5470	Shoot Down		SimilarAt5g27450: Mevalonate kinase (Arabidopsis thaliana)			13.0455	6.52622
AUR62000842	0	Has Orthologs	Cluster 5471			SimilarAMI1: Amidase 1 (Arabidopsis thaliana)
AUR62000843	0	Singleton	N/A			Protein of unknown function
AUR62000844	0	Singleton	N/A			SimilarAt3g22470: Pentatricopeptide repeat-containing protein At3g22470%2C mitochondrial (Arabidopsis thaliana)
AUR62000845	0	Quinoa Specific	Cluster 16233		Quinoa Overrepresented	SimilarAt1g06580: Pentatricopeptide repeat-containing protein At1g06580 (Arabidopsis thaliana)
AUR62000846	0	Has Orthologs	Cluster 5472			SimilarSDE3: Probable RNA helicase SDE3 (Arabidopsis thaliana)
AUR62000847	0	Has Orthologs	Cluster 13181			SimilarAHP5: Histidine-containing phosphotransfer protein 5 (Arabidopsis thaliana)
AUR62000848	0	Has Orthologs	Cluster 3608			SimilarATG18H: Autophagy-related protein 18h (Arabidopsis thaliana)
AUR62000849	0	Has Orthologs	Cluster 5473			SimilarRBK2: Receptor-like cytosolic serine/threonine-protein kinase RBK2 (Arabidopsis thaliana)
AUR62000850	12	Has Orthologs	Cluster 11578		Quinoa Overrepresented	SimilarSlc22a2: Solute carrier family 22 member 2 (Mus musculus)
AUR62000851	5	Singleton	N/A			Protein of unknown function
AUR62000852	11	Has Orthologs	Cluster 1701	Root Down		SimilarSUGTL2: Sugar transporter ERD6-like 3 (Arabidopsis thaliana)	11.5931	3.94216
AUR62000853	0	Has Orthologs	Cluster 5474			Protein of unknown function
AUR62000854	10	Has Orthologs	Cluster 5475			SimilarAt1g54730: Sugar transporter ERD6-like 5 (Arabidopsis thaliana)
AUR62000855	0	Has Orthologs	Cluster 11579			Protein of unknown function
AUR62000856	10	Has Orthologs	Cluster 1701			SimilarSlc22a15: Solute carrier family 22 member 15 (Mus musculus)
AUR62000857	0	Has Orthologs	Cluster 1022		Quinoa Overrepresented	SimilarGSTT3: Glutathione S-transferase T3 (Arabidopsis thaliana)
AUR62000858	0	Has Orthologs	Cluster 11297			SimilarAt3g05170: Phosphoglycerate mutase-like protein AT74 (Arabidopsis thaliana)
AUR62000859	0	Has Orthologs	Cluster 5476			SimilarGSH2: Glutathione synthetase%2C chloroplastic (Solanum lycopersicum)
AUR62000860	0	Has Orthologs	Cluster 5477			Protein of unknown function
AUR62000861	0	Singleton	N/A			Protein of unknown function
AUR62000862	10	Has Orthologs	Cluster 1414			SimilarNHX2: Sodium/hydrogen exchanger 2 (Arabidopsis thaliana)
AUR62000863	0	Quinoa Specific	Cluster 16234		Quinoa Overrepresented	Protein of unknown function
AUR62000864	0	Has Orthologs	Cluster 5478	Shoot Up		Protein of unknown function			6.81621	12.3173
AUR62000865	1	Has Orthologs	Cluster 13182	Shoot Up		Protein of unknown function			122.843	192.297
AUR62000866	0	Has Orthologs	Cluster 13183			SimilarAt1g54790: GDSL esterase/lipase At1g54790 (Arabidopsis thaliana)
AUR62000867	0	Has Orthologs	Cluster 5479			SimilarPSS1: Kinesin-1-like protein PSS1 (Oryza sativa subsp. japonica)
AUR62000868	0	Has Orthologs	Cluster 5480			SimilarEEF2KMT: Protein-lysine N-methyltransferase EEF2KMT (Homo sapiens)
AUR62000869	0	Has Orthologs	Cluster 5481			SimilarAt5g27410: Branched-chain-amino-acid aminotransferase-like protein 2 (Arabidopsis thaliana)
AUR62000870	1	Has Orthologs	Cluster 11580			Protein of unknown function
AUR62000871	0	Has Orthologs	Cluster 5482			SimilarBHLH96: Transcription factor bHLH96 (Arabidopsis thaliana)
AUR62000872	1	Has Orthologs	Cluster 5483			Protein of unknown function
AUR62000873	2	Has Orthologs	Cluster 5484			SimilarATL6: E3 ubiquitin-protein ligase ATL6 (Arabidopsis thaliana)
AUR62000874	0	Has Orthologs	Cluster 11581			SimilarATL20: RING-H2 finger protein ATL20 (Arabidopsis thaliana)
AUR62000875	0	Has Orthologs	Cluster 11582		Quinoa Overrepresented	SimilarATL68: RING-H2 finger protein ATL68 (Arabidopsis thaliana)
AUR62000876	1	Quinoa Specific	Cluster 14530		Quinoa Overrepresented	SimilarATL47: RING-H2 finger protein ATL47 (Arabidopsis thaliana)
AUR62000877	0	Has Orthologs	Cluster 11582		Quinoa Overrepresented	SimilarRNF150: RING finger protein 150 (Homo sapiens)
AUR62000878	1	Quinoa Specific	Cluster 16235		Quinoa Overrepresented	SimilarATL16: RING-H2 finger protein ATL16 (Arabidopsis thaliana)
AUR62000879	1	Has Orthologs	Cluster 11583			SimilarATL1: RING-H2 finger protein ATL1 (Arabidopsis thaliana)
AUR62000880	0	Has Orthologs	Cluster 5485			SimilarATL80: RING-H2 finger protein ATL80 (Arabidopsis thaliana)
AUR62000881	1	Has Orthologs	Cluster 11584			Protein of unknown function
AUR62000882	4	Has Orthologs	Cluster 2902	Shoot Up	Quinoa Overrepresented	Protein of unknown function			0	5.54796
AUR62000883	4	Quinoa Specific	Cluster 16236		Quinoa Overrepresented	Protein of unknown function
AUR62000884	4	Has Orthologs	Cluster 2902		Quinoa Overrepresented	Protein of unknown function
AUR62000885	0	Has Orthologs	Cluster 13184			SimilarATL6: E3 ubiquitin-protein ligase ATL6 (Arabidopsis thaliana)
AUR62000886	0	Has Orthologs	Cluster 1011		Quinoa Overrepresented	Protein of unknown function
AUR62000887	4	Has Orthologs	Cluster 5486			SimilarATL32: RING-H2 finger protein ATL32 (Arabidopsis thaliana)
AUR62000888	0	Has Orthologs	Cluster 5487			SimilarERCC1: DNA excision repair protein ERCC-1 (Arabidopsis thaliana)
AUR62000889	0	Has Orthologs	Cluster 5488			SimilarCDL1: Serine/threonine-protein kinase CDL1 (Arabidopsis thaliana)
AUR62000890	0	Singleton	N/A			SimilarAlg13: UDP-N-acetylglucosamine transferase subunit ALG13 homolog (Rattus norvegicus)
AUR62000891	0	Singleton	N/A			Protein of unknown function
AUR62000892	10	Has Orthologs	Cluster 5489			SimilarCCX5: Cation/calcium exchanger 5 (Arabidopsis thaliana)
AUR62000893	0	Singleton	N/A			SimilarNFYC9: Nuclear transcription factor Y subunit C-9 (Arabidopsis thaliana)
AUR62000894	0	Has Orthologs	Cluster 5490			SimilarIDM2: Increased DNA methylation 2 (Arabidopsis thaliana)
AUR62000895	0	Has Orthologs	Cluster 5491			SimilarACD22.3: Alpha-crystallin domain-containing protein 22.3 (Arabidopsis thaliana)
AUR62000896	0	Quinoa Specific	Cluster 2510		Quinoa Overrepresented	Protein of unknown function
AUR62000897	0	Has Orthologs	Cluster 5492			SimilarCPT1: Coleoptile phototropism protein 1 (Oryza sativa subsp. japonica)
AUR62000898	0	Singleton	N/A			SimilarNAM-B1: NAC transcription factor NAM-B1 (Triticum dicoccoides)
AUR62000899	1	Has Orthologs	Cluster 2721	Shoot Down		Protein of unknown function			12.0949	8.31768
AUR62000900	0	Has Orthologs	Cluster 1800			SimilarGID1C: Gibberellin receptor GID1C (Arabidopsis thaliana)
AUR62000901	0	Has Orthologs	Cluster 5493			Similarwdr76: WD repeat-containing protein 76 (Xenopus laevis)
AUR62000902	0	Has Orthologs	Cluster 5494			Protein of unknown function
AUR62000903	0	Has Orthologs	Cluster 5495			SimilarHIS2A: Histone H2AX (Cicer arietinum)
AUR62000904	3	Has Orthologs	Cluster 5496			SimilarPAT17: Probable protein S-acyltransferase 17 (Arabidopsis thaliana)
AUR62000905	0	Has Orthologs	Cluster 4185		Quinoa Overrepresented	SimilarCYCL1-1: Cyclin-L1-1 (Arabidopsis thaliana)
AUR62000906	0	Singleton	N/A			SimilarBON3: Protein BONZAI 3 (Arabidopsis thaliana)
AUR62000907	5	Has Orthologs	Cluster 14531			SimilarPPT2: Phosphoenolpyruvate/phosphate translocator 2%2C chloroplastic (Oryza sativa subsp. japonica)
AUR62000908	0	Singleton	N/A			Protein of unknown function
AUR62000909	0	Quinoa Specific	Cluster 1444		Quinoa Overrepresented	SimilarZMYM1: Zinc finger MYM-type protein 1 (Homo sapiens)
AUR62000910	0	Has Orthologs	Cluster 1026		Quinoa Overrepresented	SimilarOs05g0583200: Zinc finger BED domain-containing protein RICESLEEPER 3 (Oryza sativa subsp. japonica)
AUR62000911	0	Singleton	N/A			SimilarTBL6: Protein trichome birefringence-like 6 (Arabidopsis thaliana)
AUR62000912	0	Has Orthologs	Cluster 11450			SimilarXTH27: Probable xyloglucan endotransglucosylase/hydrolase protein 27 (Arabidopsis thaliana)
AUR62000913	0	Has Orthologs	Cluster 5497		Quinoa Overrepresented	Similarnep1: Aspartic proteinase nepenthesin-1 (Nepenthes gracilis)
AUR62000914	0	Has Orthologs	Cluster 4091			SimilarEMB3004: Bifunctional 3-dehydroquinate dehydratase/shikimate dehydrogenase%2C chloroplastic (Arabidopsis thaliana)
AUR62000915	0	Singleton	N/A			Protein of unknown function
AUR62000916	0	Has Orthologs	Cluster 13185			Similaralkbh6: Alpha-ketoglutarate-dependent dioxygenase alkB homolog 6 (Xenopus laevis)
AUR62000917	0	Has Orthologs	Cluster 14532			SimilarFRL1: FRIGIDA-like protein 1 (Arabidopsis thaliana)
AUR62000918	0	Has Orthologs	Cluster 1700		Quinoa Overrepresented (with Beet)	Protein of unknown function
AUR62000919	0	Singleton	N/A			Protein of unknown function
AUR62000920	0	Singleton	N/A			Protein of unknown function
AUR62000921	0	Has Orthologs	Cluster 1700		Quinoa Overrepresented (with Beet)	SimilarFRL2: FRIGIDA-like protein 2 (Arabidopsis thaliana)
AUR62000922	0	Singleton	N/A			Protein of unknown function
AUR62000923	0	Singleton	N/A			Protein of unknown function
AUR62000924	0	Quinoa Specific	Cluster 16237		Quinoa Overrepresented	Protein of unknown function
AUR62000925	0	Has Orthologs	Cluster 14533			SimilarFRL5: FRIGIDA-like protein 5 (Arabidopsis thaliana)
AUR62000926	3	Singleton	N/A			Protein of unknown function
AUR62000927	0	Quinoa Specific	Cluster 5498		Quinoa Overrepresented	Protein of unknown function
AUR62000928	0	Has Orthologs	Cluster 3681			SimilarTrappc6b: Trafficking protein particle complex subunit 6B (Mus musculus)
AUR62000929	0	Has Orthologs	Cluster 5499			SimilarSODCC: Superoxide dismutase [Cu-Zn] (Spinacia oleracea)
AUR62000930	0	Has Orthologs	Cluster 5500			Protein of unknown function
AUR62000931	6	Has Orthologs	Cluster 5501			SimilarTPRA1: Transmembrane protein adipocyte-associated 1 homolog (Gallus gallus)
AUR62000932	0	Has Orthologs	Cluster 3680			SimilarACL1.2: Acyl carrier protein 2%2C chloroplastic (Spinacia oleracea)
AUR62000933	1	Has Orthologs	Cluster 5502			SimilarPVA22: Vesicle-associated protein 2-2 (Arabidopsis thaliana)
AUR62000934	12	Has Orthologs	Cluster 1414	Shoot Up		SimilarNHX2: Sodium/hydrogen exchanger 2 (Arabidopsis thaliana)			31.7439	59.9931
AUR62000935	0	Has Orthologs	Cluster 1638			SimilarRPL36B: 60S ribosomal protein L36-2 (Arabidopsis thaliana)
AUR62000936	0	Has Orthologs	Cluster 2806			SimilarrplT: 50S ribosomal protein L20 (Rhodospirillum centenum (strain ATCC 51521 / SW))
AUR62000937	0	Singleton	N/A			Protein of unknown function
AUR62000938	0	Has Orthologs	Cluster 1222	Shoot Up	Quinoa Overrepresented	SimilarTIR1: Protein TRANSPORT INHIBITOR RESPONSE 1 (Arabidopsis thaliana)			21.5395	30.0229
AUR62000939	0	Has Orthologs	Cluster 5503			SimilarHST1: Protein HASTY 1 (Arabidopsis thaliana)
AUR62000940	0	Has Orthologs	Cluster 1092			SimilarAt1g54610: Probable serine/threonine-protein kinase At1g54610 (Arabidopsis thaliana)
AUR62000941	0	Has Orthologs	Cluster 2741			SimilarNOP5-2: Probable nucleolar protein 5-2 (Arabidopsis thaliana)
AUR62000942	0	Singleton	N/A			SimilarFTSH7: ATP-dependent zinc metalloprotease FTSH 7%2C chloroplastic (Arabidopsis thaliana)
AUR62000943	0	Singleton	N/A			SimilarBON3: Protein BONZAI 3 (Arabidopsis thaliana)
AUR62000944	4	Has Orthologs	Cluster 2849		Quinoa Overrepresented (with Beet)	SimilarANK1: Ankyrin-1 (Homo sapiens)
AUR62000945	1	Has Orthologs	Cluster 2845	Root Down; Shoot Down		SimilarPAP3: Purple acid phosphatase 3 (Arabidopsis thaliana)	31.0761	11.5707	15.22	8.31419
AUR62000946	0	Has Orthologs	Cluster 4186			SimilarDRB2: Double-stranded RNA-binding protein 2 (Oryza sativa subsp. japonica)
AUR62000947	0	Has Orthologs	Cluster 1486	Shoot Up		SimilarAt1g54570: Acyltransferase-like protein At1g54570%2C chloroplastic (Arabidopsis thaliana)			18.1647	33.6967
AUR62000948	0	Has Orthologs	Cluster 5504			SimilarWDR48: WD repeat-containing protein 48 (Gallus gallus)
AUR62000949	11	Has Orthologs	Cluster 1378			SimilarDTX16: Protein DETOXIFICATION 16 (Arabidopsis thaliana)
AUR62000950	1	Has Orthologs	Cluster 5505	Shoot Down		SimilarARB_07867: WSC domain-containing protein ARB_07867 (Arthroderma benhamiae (strain ATCC MYA-4681 / CBS 112371))			3.79536	1.87282
AUR62000951	0	Has Orthologs	Cluster 2223			SimilarRPN5A: 26S proteasome non-ATPase regulatory subunit 12 homolog A (Arabidopsis thaliana)
AUR62000952	0	Has Orthologs	Cluster 5506	Root Up		SimilarKCBP: Kinesin-like calmodulin-binding protein (Arabidopsis thaliana)	11.4901	21.3547
AUR62000953	0	Singleton	N/A			Protein of unknown function
AUR62000954	0	Has Orthologs	Cluster 5507			Protein of unknown function
AUR62000955	0	Has Orthologs	Cluster 5508			Protein of unknown function
AUR62000956	0	Has Orthologs	Cluster 5509	Shoot Up		SimilarEMB2761: Threonine--tRNA ligase%2C chloroplastic/mitochondrial 2 (Arabidopsis thaliana)			30.0249	41.2005
AUR62000957	0	Has Orthologs	Cluster 5510			Similarp20: Uncharacterized N-acetyltransferase p20 (Bacillus licheniformis)
AUR62000958	0	Has Orthologs	Cluster 5511			SimilarEDR1: Serine/threonine-protein kinase EDR1 (Arabidopsis thaliana)
AUR62000959	0	Has Orthologs	Cluster 1233			SimilarARB_07867: WSC domain-containing protein ARB_07867 (Arthroderma benhamiae (strain ATCC MYA-4681 / CBS 112371))
AUR62000960	0	Has Orthologs	Cluster 4187			SimilarTSR2: Pre-rRNA-processing protein TSR2 (Saccharomyces cerevisiae (strain ATCC 204508 / S288c))
AUR62000961	0	Has Orthologs	Cluster 5512			SimilarLate embryogenesis abundant protein D-34 (Gossypium hirsutum)
AUR62000962	1	Quinoa Specific	Cluster 16238		Quinoa Overrepresented	SimilarCRK42: Cysteine-rich receptor-like protein kinase 42 (Arabidopsis thaliana)
AUR62000963	0	Has Orthologs	Cluster 5513			Similarmon2: Protein MON2 homolog (Drosophila melanogaster)
AUR62000964	0	Singleton	N/A			Protein of unknown function
AUR62000965	0	Has Orthologs	Cluster 5514			Similarcys12: Cysteine synthase 2 (Schizosaccharomyces pombe (strain 972 / ATCC 24843))
AUR62000966	0	Has Orthologs	Cluster 5515			SimilarCysteine synthase (Spinacia oleracea)
AUR62000967	0	Has Orthologs	Cluster 1467			SimilarXRN4: 5'-3' exoribonuclease 4 (Arabidopsis thaliana)
AUR62000968	0	Has Orthologs	Cluster 5516	Shoot Up		Similarrub: Rubredoxin (Synechocystis sp. (strain PCC 6803 / Kazusa))			38.0232	73.304
AUR62000969	0	Has Orthologs	Cluster 13186			SimilarAt4g25210: Mediator-associated protein 1 (Arabidopsis thaliana)
AUR62000970	0	Singleton	N/A			Protein of unknown function
AUR62000971	0	Has Orthologs	Cluster 5517			SimilarguaD: Guanine deaminase (Bacillus subtilis (strain 168))
AUR62000972	0	Has Orthologs	Cluster 14534	Shoot Up		SimilartadA: tRNA-specific adenosine deaminase (Staphylococcus aureus (strain Mu50 / ATCC 700699))			5.00854	8.97428
AUR62000973	0	Has Orthologs	Cluster 5518			SimilarAt1g06710: Pentatricopeptide repeat-containing protein At1g06710%2C mitochondrial (Arabidopsis thaliana)
AUR62000974	1	Has Orthologs	Cluster 5519	Shoot Up		Protein of unknown function			20.864	31.0631
AUR62000975	0	Has Orthologs	Cluster 2018			SimilarWNK1: Serine/threonine-protein kinase WNK1 (Arabidopsis thaliana)
AUR62000976	0	Has Orthologs	Cluster 11585			Protein of unknown function
AUR62000977	0	Has Orthologs	Cluster 11585			Protein of unknown function
AUR62000978	0	Singleton	N/A			Protein of unknown function
AUR62000979	0	Has Orthologs	Cluster 13188			Protein of unknown function
AUR62000980	0	Singleton	N/A			SimilarDRT102: DNA-damage-repair/toleration protein DRT102 (Arabidopsis thaliana)
AUR62000981	0	Singleton	N/A			Protein of unknown function
AUR62000982	0	Has Orthologs	Cluster 2903		Quinoa Overrepresented	Protein of unknown function
AUR62000983	0	Has Orthologs	Cluster 13187			SimilarDRT102: DNA-damage-repair/toleration protein DRT102 (Arabidopsis thaliana)
AUR62000984	0	Has Orthologs	Cluster 5520			SimilarZeta-carotene desaturase%2C chloroplastic/chromoplastic (Tagetes erecta)
AUR62000985	0	Has Orthologs	Cluster 5521			Protein of unknown function
AUR62000986	0	Has Orthologs	Cluster 5522			SimilarAt3g48440: Zinc finger CCCH domain-containing protein 43 (Arabidopsis thaliana)
AUR62000987	0	Singleton	N/A			SimilarTIF3F1: Eukaryotic translation initiation factor 3 subunit F (Arabidopsis thaliana)
AUR62000988	0	Has Orthologs	Cluster 1586		Quinoa Overrepresented	SimilarSPAC869.01: Putative amidase C869.01 (Schizosaccharomyces pombe (strain 972 / ATCC 24843))
AUR62000989	1	Has Orthologs	Cluster 1586	Shoot Down	Quinoa Overrepresented	SimilarARB_02965: Putative amidase ARB_02965 (Arthroderma benhamiae (strain ATCC MYA-4681 / CBS 112371))			22.0092	15.5481
AUR62000990	0	Singleton	N/A			Protein of unknown function
AUR62000991	0	Singleton	N/A			Protein of unknown function
AUR62000992	0	Has Orthologs	Cluster 17718			SimilarAt1g29670: GDSL esterase/lipase At1g29670 (Arabidopsis thaliana)
AUR62000993	3	Has Orthologs	Cluster 5523			SimilarPRA1E: PRA1 family protein E (Arabidopsis thaliana)
AUR62000994	0	Has Orthologs	Cluster 5524	Shoot Down		SimilarAIP3: Probable prefoldin subunit 4 (Arabidopsis thaliana)			36.021	23.108
AUR62000995	9	Has Orthologs	Cluster 1113			SimilarNPF1.2: Protein NRT1/ PTR FAMILY 1.2 (Arabidopsis thaliana)
AUR62000996	0	Has Orthologs	Cluster 5525			SimilarDRIP2: E3 ubiquitin protein ligase DRIP2 (Arabidopsis thaliana)
AUR62000997	0	Singleton	N/A			Protein of unknown function
AUR62000998	0	Quinoa Specific	Cluster 16239		Quinoa Overrepresented	SimilarAt1g68410: Probable protein phosphatase 2C 15 (Arabidopsis thaliana)
AUR62000999	0	Has Orthologs	Cluster 1306		Quinoa Overrepresented (with Beet)	SimilarAnkrd28: Serine/threonine-protein phosphatase 6 regulatory ankyrin repeat subunit A (Mus musculus)
AUR62001000	3	Singleton	N/A			SimilarAGD2: Probable LL-diaminopimelate aminotransferase%2C chloroplastic (Oryza sativa subsp. japonica)
AUR62001001	0	Has Orthologs	Cluster 2511			SimilarPathogenesis-related protein P2 (Solanum lycopersicum)
AUR62001002	0	Singleton	N/A	Shoot Down		SimilarIAA16: Auxin-responsive protein IAA16 (Arabidopsis thaliana)			102.659	53.5078
AUR62001003	0	Has Orthologs	Cluster 5526	Root Down; Shoot Down		SimilarAUX22B: Auxin-induced protein 22B (Vigna radiata var. radiata)	127.317	42.099	59.1156	20.119
AUR62001004	0	Has Orthologs	Cluster 2673			SimilarIAA4: Auxin-responsive protein IAA4 (Arabidopsis thaliana)
AUR62001005	0	Has Orthologs	Cluster 2673			SimilarIAA3: Auxin-responsive protein IAA3 (Arabidopsis thaliana)
AUR62001006	0	Has Orthologs	Cluster 4188			SimilarMED14: Mediator of RNA polymerase II transcription subunit 14 (Arabidopsis thaliana)
AUR62001007	0	Has Orthologs	Cluster 5527			SimilarUNE12: Transcription factor UNE12 (Arabidopsis thaliana)
AUR62001008	0	Has Orthologs	Cluster 13189			SimilarTATA: Sec-independent protein translocase protein TATA%2C chloroplastic (Arabidopsis thaliana)
AUR62001009	0	Has Orthologs	Cluster 5528			SimilarPCMP-E93: Pentatricopeptide repeat-containing protein At3g18970 (Arabidopsis thaliana)
AUR62001010	0	Has Orthologs	Cluster 3380			SimilarCPRF2: Light-inducible protein CPRF2 (Petroselinum crispum)
AUR62001011	0	Singleton	N/A			Protein of unknown function
AUR62001012	0	Has Orthologs	Cluster 3381	Shoot Up		SimilarOsI_032456: GDP-mannose 3%2C5-epimerase 1 (Oryza sativa subsp. indica)			58.565	99.0005
AUR62001013	0	Has Orthologs	Cluster 5529	Shoot Up		Protein of unknown function			7.55315	12.3751
AUR62001014	0	Has Orthologs	Cluster 5530			Protein of unknown function
AUR62001015	8	Has Orthologs	Cluster 1058			SimilarACA12: Calcium-transporting ATPase 12%2C plasma membrane-type (Arabidopsis thaliana)
AUR62001016	8	Has Orthologs	Cluster 1058			SimilarACA10: Calcium-transporting ATPase 10%2C plasma membrane-type (Arabidopsis thaliana)
AUR62001017	0	Singleton	N/A			Protein of unknown function
AUR62001018	0	Has Orthologs	Cluster 4189		Quinoa Overrepresented	SimilarRPD1: Protein ROOT PRIMORDIUM DEFECTIVE 1 (Arabidopsis thaliana)
AUR62001019	0	Has Orthologs	Cluster 13190			SimilarSURF1: Surfeit locus protein 1 (Arabidopsis thaliana)
AUR62001020	0	Has Orthologs	Cluster 14535		Quinoa Overrepresented	SimilarAKR1: Probable aldo-keto reductase 1 (Glycine max)
AUR62001021	0	Has Orthologs	Cluster 5531			SimilarCER2: Protein ECERIFERUM 1 (Arabidopsis thaliana)
AUR62001022	0	Has Orthologs	Cluster 5532			SimilarPNG1: Peptide-N(4)-(N-acetyl-beta-glucosaminyl)asparagine amidase (Arabidopsis thaliana)
AUR62001023	0	Has Orthologs	Cluster 5533			SimilarAt5g10920: Argininosuccinate lyase%2C chloroplastic (Arabidopsis thaliana)
AUR62001024	0	Has Orthologs	Cluster 13191			SimilarAt3g04780: PITH domain-containing protein At3g04780 (Arabidopsis thaliana)
AUR62001025	1	Has Orthologs	Cluster 15905			SimilarEogt: EGF domain-specific O-linked N-acetylglucosamine transferase (Mus musculus)
AUR62001026	0	Has Orthologs	Cluster 13192	Shoot Up		SimilarRPI3: Probable ribose-5-phosphate isomerase 3%2C chloroplastic (Arabidopsis thaliana)			236.796	370.687
AUR62001027	0	Singleton	N/A			Protein of unknown function
AUR62001028	0	Has Orthologs	Cluster 1770			SimilarNEK2: Serine/threonine-protein kinase Nek2 (Arabidopsis thaliana)
AUR62001029	0	Has Orthologs	Cluster 5534	Shoot Up		SimilarAt5g28300: Trihelix transcription factor GTL2 (Arabidopsis thaliana)			9.25837	16.2567
AUR62001030	0	Has Orthologs	Cluster 1060		Quinoa Overrepresented	SimilarRetrovirus-related Pol polyprotein from transposon TNT 1-94 (Nicotiana tabacum)
AUR62001031	0	Quinoa Specific	Cluster 11586		Quinoa Overrepresented	Protein of unknown function
AUR62001032	0	Has Orthologs	Cluster 11587		Quinoa Overrepresented	Protein of unknown function
AUR62001033	0	Quinoa Specific	Cluster 16240		Quinoa Overrepresented	SimilarTIM23-3: Mitochondrial import inner membrane translocase subunit TIM23-3 (Arabidopsis thaliana)
AUR62001034	0	Has Orthologs	Cluster 5535			SimilarPUS7: Pseudouridylate synthase 7 homolog (Bos taurus)
AUR62001035	0	Quinoa Specific	Cluster 11588		Quinoa Overrepresented	Protein of unknown function
AUR62001036	0	Has Orthologs	Cluster 4190		Quinoa Overrepresented	SimilarCdc123: Cell division cycle protein 123 homolog (Rattus norvegicus)
AUR62001037	0	Has Orthologs	Cluster 5536			Similarbsdc1: BSD domain-containing protein 1 (Danio rerio)
AUR62001038	4	Singleton	N/A			SimilarAt2g01680: Ankyrin repeat-containing protein At2g01680 (Arabidopsis thaliana)
AUR62001039	0	Quinoa Specific	Cluster 1254		Quinoa Overrepresented	Protein of unknown function
AUR62001040	0	Has Orthologs	Cluster 4082		Quinoa Overrepresented (with Beet)	SimilarAt5g52610: Putative F-box protein At5g52610 (Arabidopsis thaliana)
AUR62001041	0	Has Orthologs	Cluster 4082		Quinoa Overrepresented (with Beet)	Protein of unknown function
AUR62001042	0	Has Orthologs	Cluster 2896		Quinoa Overrepresented	SimilarAGL62: Agamous-like MADS-box protein AGL62 (Arabidopsis thaliana)
AUR62001043	0	Has Orthologs	Cluster 5537		Quinoa Overrepresented	SimilarRTM1: Protein RESTRICTED TEV MOVEMENT 1 (Arabidopsis thaliana)
AUR62001044	0	Has Orthologs	Cluster 5538			SimilarATHB-5: Homeobox-leucine zipper protein ATHB-5 (Arabidopsis thaliana)
AUR62001045	0	Has Orthologs	Cluster 3382			SimilarTSO1: CRC domain-containing protein TSO1 (Arabidopsis thaliana)
AUR62001046	0	Has Orthologs	Cluster 13193			SimilarREX4: RNA exonuclease 4 (Candida glabrata (strain ATCC 2001 / CBS 138 / JCM 3761 / NBRC 0622 / NRRL Y-65))
AUR62001047	0	Has Orthologs	Cluster 5539			SimilarPDF1B: Peptide deformylase 1B%2C chloroplastic (Solanum lycopersicum)
AUR62001048	0	Has Orthologs	Cluster 4191		Quinoa Overrepresented	SimilarAt3g06240: F-box/kelch-repeat protein At3g06240 (Arabidopsis thaliana)
AUR62001049	0	Has Orthologs	Cluster 5540			SimilarWRKY74: Probable WRKY transcription factor 74 (Arabidopsis thaliana)
AUR62001050	0	Has Orthologs	Cluster 1021		Quinoa Overrepresented	Protein of unknown function
AUR62001051	0	Has Orthologs	Cluster 5541			Protein of unknown function
AUR62001052	0	Has Orthologs	Cluster 5542			SimilarANK1: Ankyrin-1 (Homo sapiens)
AUR62001053	0	Singleton	N/A			Protein of unknown function
AUR62001054	0	Has Orthologs	Cluster 4191		Quinoa Overrepresented	Protein of unknown function
AUR62001055	0	Singleton	N/A			Protein of unknown function
AUR62001056	0	Has Orthologs	Cluster 5543			Protein of unknown function
AUR62001057	0	Has Orthologs	Cluster 1259			Protein of unknown function
AUR62001058	0	Has Orthologs	Cluster 5544			SimilarWVD2: Protein WAVE-DAMPENED 2 (Arabidopsis thaliana)
AUR62001059	0	Has Orthologs	Cluster 3383			SimilarFLK: Flowering locus K homology domain (Arabidopsis thaliana)
AUR62001060	0	Has Orthologs	Cluster 1534			Protein of unknown function
AUR62001061	1	Has Orthologs	Cluster 5545			SimilarMYOB1: Myosin-binding protein 1 (Arabidopsis thaliana)
AUR62001062	0	Has Orthologs	Cluster 1022		Quinoa Overrepresented	SimilarGIF1: GRF1-interacting factor 1 (Arabidopsis thaliana)
AUR62001063	0	Has Orthologs	Cluster 1016		Quinoa Overrepresented	Protein of unknown function
AUR62001064	0	Singleton	N/A			Protein of unknown function
AUR62001065	0	Has Orthologs	Cluster 1047			SimilarXI-E: Myosin-11 (Arabidopsis thaliana)
AUR62001066	0	Has Orthologs	Cluster 11589			SimilarMYCBP: C-Myc-binding protein (Bos taurus)
AUR62001067	8	Has Orthologs	Cluster 4192		Quinoa Overrepresented	SimilarCOX15: Cytochrome c oxidase assembly protein COX15 (Arabidopsis thaliana)
AUR62001068	0	Has Orthologs	Cluster 2825		Quinoa Overrepresented (with Beet)	SimilarAt1g74320: Probable choline kinase 2 (Arabidopsis thaliana)
AUR62001069	1	Singleton	N/A	Shoot Up		Protein of unknown function			87.3063	145.985
AUR62001070	0	Singleton	N/A			SimilarKin: DNA/RNA-binding protein KIN17 (Mus musculus)
AUR62001071	0	Has Orthologs	Cluster 5546			Similarchmp7: Charged multivesicular body protein 7 (Xenopus laevis)
AUR62001072	0	Singleton	N/A			SimilarSTPS: Probable sesquiterpene synthase (Santalum murrayanum)
AUR62001073	0	Has Orthologs	Cluster 5547			SimilarPME68: Probable pectinesterase 68 (Arabidopsis thaliana)
AUR62001074	0	Has Orthologs	Cluster 1022		Quinoa Overrepresented	Protein of unknown function
AUR62001075	0	Has Orthologs	Cluster 2463			SimilarRPS30A: 40S ribosomal protein S30 (Arabidopsis thaliana)
AUR62001076	0	Has Orthologs	Cluster 2850			Protein of unknown function
AUR62001077	0	Has Orthologs	Cluster 1017		Quinoa Overrepresented	Protein of unknown function
AUR62001078	0	Has Orthologs	Cluster 5548			SimilarAHL20: AT-hook motif nuclear-localized protein 20 (Arabidopsis thaliana)
AUR62001079	0	Has Orthologs	Cluster 11590			SimilarMETTL6: Methyltransferase-like protein 6 (Homo sapiens)
AUR62001080	0	Has Orthologs	Cluster 4193			Protein of unknown function
AUR62001081	4	Has Orthologs	Cluster 1960			SimilarEIN4: Protein EIN4 (Arabidopsis thaliana)
AUR62001082	0	Has Orthologs	Cluster 5549	Shoot Up		SimilarAHL14: AT-hook motif nuclear-localized protein 14 (Arabidopsis thaliana)			37.6246	52.5987
AUR62001083	0	Has Orthologs	Cluster 4194		Quinoa Overrepresented	Protein of unknown function
AUR62001084	0	Singleton	N/A			SimilarPCMP-H38: Pentatricopeptide repeat-containing protein At5g48910 (Arabidopsis thaliana)
AUR62001085	1	Has Orthologs	Cluster 4123		Quinoa Overrepresented	SimilarAt5g48740: Probable LRR receptor-like serine/threonine-protein kinase At5g48740 (Arabidopsis thaliana)
AUR62001086	5	Has Orthologs	Cluster 4195		Quinoa Overrepresented	SimilarBB_0250: Inner membrane protein BB_0250 (Borrelia burgdorferi (strain ATCC 35210 / B31 / CIP 102532 / DSM 4680))
AUR62001087	0	Singleton	N/A			Protein of unknown function
AUR62001088	0	Has Orthologs	Cluster 4123		Quinoa Overrepresented	SimilarRWK1: Uncharacterized protein At1g24485 (Arabidopsis thaliana)
AUR62001089	7	Has Orthologs	Cluster 4195		Quinoa Overrepresented	Protein of unknown function
AUR62001090	0	Has Orthologs	Cluster 5550			SimilarRDM1: Protein RDM1 (Arabidopsis thaliana)
AUR62001091	0	Singleton	N/A			SimilarUGT78D3: UDP-glycosyltransferase 78D3 (Arabidopsis thaliana)
AUR62001092	0	Singleton	N/A			SimilarGT7: Anthocyanidin 3-O-glucosyltransferase 7 (Fragment) (Manihot esculenta)
AUR62001093	0	Has Orthologs	Cluster 3221			SimilarSFH9: Phosphatidylinositol/phosphatidylcholine transfer protein SFH9 (Arabidopsis thaliana)
AUR62001094	0	Has Orthologs	Cluster 2646			SimilarEAF1B: Chromatin modification-related protein EAF1 B (Arabidopsis thaliana)
AUR62001095	0	Has Orthologs	Cluster 13454			SimilarAt5g48730: Pentatricopeptide repeat-containing protein At5g48730%2C chloroplastic (Arabidopsis thaliana)
AUR62001096	0	Singleton	N/A			Protein of unknown function
AUR62001097	1	Has Orthologs	Cluster 5551			SimilarOXP1: 5-oxoprolinase (Arabidopsis thaliana)
AUR62001098	0	Has Orthologs	Cluster 1116		Quinoa Overrepresented	Protein of unknown function
AUR62001099	4	Has Orthologs	Cluster 1116		Quinoa Overrepresented	SimilarAt3g12360: Ankyrin repeat-containing protein At3g12360 (Arabidopsis thaliana)
AUR62001100	0	Has Orthologs	Cluster 5552	Shoot Up		Protein of unknown function			8.43277	14.0249
AUR62001101	0	Has Orthologs	Cluster 11260			SimilarAt1g06800: Phospholipase A1-Igamma1%2C chloroplastic (Arabidopsis thaliana)
AUR62001102	0	Has Orthologs	Cluster 2169			SimilarPAP15: Purple acid phosphatase 15 (Arabidopsis thaliana)
AUR62001103	0	Has Orthologs	Cluster 5553			SimilarXRI1: Protein XRI1 (Arabidopsis thaliana)
AUR62001104	0	Has Orthologs	Cluster 4196		Quinoa Overrepresented	SimilarDRT101: Phosphoacetylglucosamine mutase (Arabidopsis thaliana)
AUR62001105	5	Has Orthologs	Cluster 5554			SimilarERD2B: ER lumen protein-retaining receptor B (Arabidopsis thaliana)
AUR62001106	0	Has Orthologs	Cluster 15206			SimilarSUMO2: Small ubiquitin-related modifier 2 (Arabidopsis thaliana)
AUR62001107	3	Has Orthologs	Cluster 5555			Protein of unknown function
AUR62001108	0	Has Orthologs	Cluster 15534			SimilarXTH3: Xyloglucan endotransglucosylase/hydrolase protein 3 (Arabidopsis thaliana)
AUR62001109	3	Has Orthologs	Cluster 5556	Shoot Down		SimilarPigt: GPI transamidase component PIG-T (Mus musculus)			8.87057	5.80401
AUR62001110	7	Has Orthologs	Cluster 2482		Quinoa Overrepresented (with Beet)	SimilarCDS2: Phosphatidate cytidylyltransferase 2 (Arabidopsis thaliana)
AUR62001111	0	Singleton	N/A			SimilarrplD: 50S ribosomal protein L4 (Magnetospirillum magneticum (strain AMB-1 / ATCC 700264))
AUR62001112	0	Has Orthologs	Cluster 5557			Protein of unknown function
AUR62001113	0	Has Orthologs	Cluster 1249		Quinoa Overrepresented	Protein of unknown function
AUR62001114	0	Singleton	N/A			Similarubxn1: UBX domain-containing protein 1 (Xenopus tropicalis)
AUR62001115	0	Has Orthologs	Cluster 1022		Quinoa Overrepresented	SimilarGSTT3: Glutathione S-transferase T3 (Arabidopsis thaliana)
AUR62001116	0	Singleton	N/A			SimilarPP2AA2: Serine/threonine-protein phosphatase 2A 65 kDa regulatory subunit A beta isoform (Arabidopsis thaliana)
AUR62001117	0	Singleton	N/A			Protein of unknown function
AUR62001118	2	Has Orthologs	Cluster 5558	Shoot Down		SimilarPIGS: GPI transamidase component PIG-S (Bos taurus)			6.12961	3.46239
AUR62001119	0	Has Orthologs	Cluster 5559			SimilarPCMP-E96: Putative pentatricopeptide repeat-containing protein At3g25060%2C mitochondrial (Arabidopsis thaliana)
AUR62001120	3	Has Orthologs	Cluster 4910	Shoot Down		Protein of unknown function			10.4696	6.05396
AUR62001121	0	Has Orthologs	Cluster 1170	Shoot Down	Quinoa Overrepresented	SimilarRIN4: RPM1-interacting protein 4 (Arabidopsis thaliana)			5.49974	1.45637
AUR62001122	0	Singleton	N/A			Protein of unknown function
AUR62001123	1	Has Orthologs	Cluster 2804			SimilarAt3g47200: UPF0481 protein At3g47200 (Arabidopsis thaliana)
AUR62001124	0	Quinoa Specific	Cluster 16241	Root Up	Quinoa Overrepresented	Protein of unknown function	3.68628	7.77201
AUR62001125	1	Singleton	N/A			SimilarAt3g47200: UPF0481 protein At3g47200 (Arabidopsis thaliana)
AUR62001126	0	Quinoa Specific	Cluster 16241		Quinoa Overrepresented	Protein of unknown function
AUR62001127	0	Has Orthologs	Cluster 2804			Protein of unknown function
AUR62001128	0	Singleton	N/A			Protein of unknown function
AUR62001129	0	Has Orthologs	Cluster 5560			Protein of unknown function
AUR62001130	0	Has Orthologs	Cluster 3220			SimilarFATA: Oleoyl-acyl carrier protein thioesterase 1%2C chloroplastic (Arabidopsis thaliana)
AUR62001131	0	Has Orthologs	Cluster 5561			Protein of unknown function
AUR62001132	0	Has Orthologs	Cluster 13455			SimilarFHA2: FHA domain-containing protein FHA2 (Arabidopsis thaliana)
AUR62001133	5	Has Orthologs	Cluster 13456			SimilarICMTB: Protein-S-isoprenylcysteine O-methyltransferase B (Arabidopsis thaliana)
AUR62001134	0	Has Orthologs	Cluster 5562			SimilarAt4g13040: Ethylene-responsive transcription factor-like protein At4g13040 (Arabidopsis thaliana)
AUR62001135	0	Has Orthologs	Cluster 5563	Shoot Down		Protein of unknown function			9.936	4.44933
AUR62001136	0	Has Orthologs	Cluster 5564			SimilarFRK2: Fructokinase-2 (Oryza sativa subsp. japonica)
AUR62001137	0	Has Orthologs	Cluster 1739			SimilarGAUT8: Galacturonosyltransferase 8 (Arabidopsis thaliana)
AUR62001138	0	Has Orthologs	Cluster 5565			Similarnxt3: Putative G3BP-like protein (Schizosaccharomyces pombe (strain 972 / ATCC 24843))
AUR62001139	0	Has Orthologs	Cluster 5566			SimilarAFP3: Ninja-family protein AFP3 (Arabidopsis thaliana)
AUR62001140	8	Quinoa Specific	Cluster 16242		Quinoa Overrepresented	Protein of unknown function
AUR62001141	5	Singleton	N/A			SimilarERD2A: ER lumen protein-retaining receptor A (Arabidopsis thaliana)
AUR62001142	6	Singleton	N/A			SimilarC28H8.4: Putative ER lumen protein-retaining receptor C28H8.4 (Caenorhabditis elegans)
AUR62001143	0	Has Orthologs	Cluster 5567			SimilarpurB: Adenylosuccinate lyase (Haemophilus influenzae (strain ATCC 51907 / DSM 11121 / KW20 / Rd))
AUR62001144	0	Has Orthologs	Cluster 5568			SimilarARG7: Indole-3-acetic acid-induced protein ARG7 (Vigna radiata var. radiata)
AUR62001145	2	Has Orthologs	Cluster 3622	Shoot Up		SimilarCYP82G1: Cytochrome P450 82G1 (Arabidopsis thaliana)			14.1271	37.304
AUR62001146	0	Has Orthologs	Cluster 4119			SimilarOs09g0504400: Cyclin-C1-1 (Oryza sativa subsp. japonica)
AUR62001147	0	Has Orthologs	Cluster 1738		Quinoa Overrepresented (with Beet)	SimilarGCH1: GTP cyclohydrolase 1 (Solanum lycopersicum)
AUR62001148	0	Has Orthologs	Cluster 1738		Quinoa Overrepresented (with Beet)	SimilarfolE: GTP cyclohydrolase 1 (Mycobacterium gilvum (strain PYR-GCK))
AUR62001149	1	Has Orthologs	Cluster 4118			Protein of unknown function
AUR62001150	0	Has Orthologs	Cluster 2857			SimilarMHK: Serine/threonine-protein kinase MHK (Arabidopsis thaliana)
AUR62001151	0	Has Orthologs	Cluster 2446			Protein of unknown function
AUR62001152	0	Has Orthologs	Cluster 1932	Shoot Up		SimilarQOR: Quinone-oxidoreductase homolog%2C chloroplastic (Spinacia oleracea)			15.573	29.1875
AUR62001153	0	Has Orthologs	Cluster 1932			SimilarQOR: Quinone-oxidoreductase homolog%2C chloroplastic (Spinacia oleracea)
AUR62001154	2	Has Orthologs	Cluster 15532			Protein of unknown function
AUR62001155	0	Has Orthologs	Cluster 5569	Root Up; Shoot Up		SimilarAt3g17800: UV-B-induced protein At3g17800%2C chloroplastic (Arabidopsis thaliana)	33.2195	72.3944	47.9965	66.9908
AUR62001156	0	Has Orthologs	Cluster 5570			SimilarOs04g0364800: Putative ripening-related protein 1 (Oryza sativa subsp. japonica)
AUR62001157	0	Has Orthologs	Cluster 4142			SimilarRH41: DEAD-box ATP-dependent RNA helicase 41 (Arabidopsis thaliana)
AUR62001158	0	Has Orthologs	Cluster 5571			Protein of unknown function
AUR62001159	0	Has Orthologs	Cluster 5572			SimilarA6: Probable glucan endo-1%2C3-beta-glucosidase A6 (Arabidopsis thaliana)
AUR62001160	0	Singleton	N/A			SimilarAt3g25210: Pentatricopeptide repeat-containing protein At3g25210%2C mitochondrial (Arabidopsis thaliana)
AUR62001161	0	Singleton	N/A			Protein of unknown function
AUR62001162	2	Has Orthologs	Cluster 1073		Quinoa Overrepresented	SimilarTMK3: Receptor-like kinase TMK3 (Arabidopsis thaliana)
AUR62001163	0	Has Orthologs	Cluster 5573			SimilarFKBP15-2: Peptidyl-prolyl cis-trans isomerase FKBP15-2 (Arabidopsis thaliana)
AUR62001164	0	Has Orthologs	Cluster 3707			SimilarFKBP62: Peptidyl-prolyl cis-trans isomerase FKBP62 (Arabidopsis thaliana)
AUR62001165	5	Has Orthologs	Cluster 1461			SimilarCSLC6: Probable xyloglucan glycosyltransferase 6 (Arabidopsis thaliana)
AUR62001166	0	Singleton	N/A			Protein of unknown function
AUR62001167	0	Has Orthologs	Cluster 11591	Shoot Up		SimilarJasmonate-induced protein homolog (Atriplex canescens)			694.471	1330.55
AUR62001168	2	Has Orthologs	Cluster 15207			Similartmem208: Transmembrane protein 208 homolog (Dictyostelium discoideum)
AUR62001169	0	Has Orthologs	Cluster 5574	Shoot Down		SimilarBHLH62: Transcription factor bHLH62 (Arabidopsis thaliana)			9.26077	0.819998
AUR62001170	0	Quinoa Specific	Cluster 1020		Quinoa Overrepresented	Protein of unknown function
AUR62001171	0	Has Orthologs	Cluster 5575			Protein of unknown function
AUR62001172	0	Has Orthologs	Cluster 13457	Root Up		Protein of unknown function	5.8536	17.3413
AUR62001173	0	Has Orthologs	Cluster 13458	Root Up; Shoot Down		SimilarOs11g0537300: Germin-like protein 11-1 (Oryza sativa subsp. japonica)	24.0042	51.6901	12.1127	5.37719
AUR62001174	0	Has Orthologs	Cluster 3181	Shoot Up		SimilarVHA-D: V-type proton ATPase subunit D (Arabidopsis thaliana)			45.6118	66.5798
AUR62001175	0	Has Orthologs	Cluster 5576			SimilarPUB9: U-box domain-containing protein 9 (Arabidopsis thaliana)
AUR62001176	0	Singleton	N/A			SimilarCHIP: E3 ubiquitin-protein ligase CHIP (Arabidopsis thaliana)
AUR62001177	0	Has Orthologs	Cluster 13459			Protein of unknown function
AUR62001178	0	Has Orthologs	Cluster 4009			SimilarOXI1: Serine/threonine-protein kinase OXI1 (Arabidopsis thaliana)
AUR62001179	0	Singleton	N/A			Protein of unknown function
AUR62001180	0	Has Orthologs	Cluster 1098		Quinoa Overrepresented (with Beet)	SimilarCYP82N2v2: Protopine 6-monooxygenase (Eschscholzia californica)
AUR62001181	0	Has Orthologs	Cluster 15505			Protein of unknown function
AUR62001182	0	Has Orthologs	Cluster 1078		Quinoa Overrepresented	Protein of unknown function
AUR62001183	0	Has Orthologs	Cluster 1098		Quinoa Overrepresented (with Beet)	SimilarCYP86A7: Cytochrome P450 86A7 (Arabidopsis thaliana)
AUR62001184	0	Has Orthologs	Cluster 1098		Quinoa Overrepresented (with Beet)	SimilarCYP96A15: Alkane hydroxylase MAH1 (Arabidopsis thaliana)
AUR62001185	0	Has Orthologs	Cluster 1098		Quinoa Overrepresented (with Beet)	SimilarCYP86B1: Cytochrome P450 86B1 (Arabidopsis thaliana)
AUR62001186	0	Quinoa Specific	Cluster 14536		Quinoa Overrepresented	SimilarCyp1b1: Cytochrome P450 1B1 (Rattus norvegicus)
AUR62001187	0	Has Orthologs	Cluster 1060		Quinoa Overrepresented	SimilarRetrovirus-related Pol polyprotein from transposon TNT 1-94 (Nicotiana tabacum)
AUR62001188	0	Quinoa Specific	Cluster 14537		Quinoa Overrepresented	Protein of unknown function
AUR62001189	0	Has Orthologs	Cluster 1098		Quinoa Overrepresented (with Beet)	SimilarCYP96A15: Alkane hydroxylase MAH1 (Arabidopsis thaliana)
AUR62001190	1	Has Orthologs	Cluster 5577			SimilarTIM21: Probable mitochondrial import inner membrane translocase subunit TIM21 (Arabidopsis thaliana)
AUR62001191	0	Has Orthologs	Cluster 5578	Shoot Down		SimilarAIR12: Auxin-induced in root cultures protein 12 (Arabidopsis thaliana)			3.00102	0
AUR62001192	0	Singleton	N/A			SimilarFKBP42: Peptidyl-prolyl cis-trans isomerase FKBP42 (Arabidopsis thaliana)
AUR62001193	5	Has Orthologs	Cluster 5579			SimilarAt4g12980: Cytochrome b561 and DOMON domain-containing protein At4g12980 (Arabidopsis thaliana)
AUR62001194	1	Has Orthologs	Cluster 5580			SimilarEDS1: Protein EDS1 (Arabidopsis thaliana)
AUR62001195	0	Has Orthologs	Cluster 5581			SimilarRABA5B: Ras-related protein RABA5b (Arabidopsis thaliana)
AUR62001196	0	Has Orthologs	Cluster 4010			SimilarCRRSP55: Cysteine-rich repeat secretory protein 55 (Arabidopsis thaliana)
AUR62001197	0	Has Orthologs	Cluster 5582			SimilarSYNC2: Asparagine--tRNA ligase%2C cytoplasmic 2 (Arabidopsis thaliana)
AUR62001198	2	Has Orthologs	Cluster 5583	Root Up		SimilarNRT3.2: High-affinity nitrate transporter 3.2 (Arabidopsis thaliana)	68.3175	153.802
AUR62001199	0	Has Orthologs	Cluster 4197		Quinoa Overrepresented	SimilarOs07g0688000: Manganese-dependent ADP-ribose/CDP-alcohol diphosphatase (Oryza sativa subsp. japonica)
AUR62001200	0	Has Orthologs	Cluster 4917			Protein of unknown function
AUR62001201	0	Has Orthologs	Cluster 5584	Shoot Up		SimilarQS: Quinolinate synthase%2C chloroplastic (Arabidopsis thaliana)			5.16676	12.0277
AUR62001202	0	Has Orthologs	Cluster 1629	Shoot Up		SimilarAFC2: Serine/threonine-protein kinase AFC2 (Arabidopsis thaliana)			21.5625	29.836
AUR62001203	0	Singleton	N/A			SimilarCOX6B-1: Cytochrome c oxidase subunit 6b-1 (Arabidopsis thaliana)
AUR62001204	0	Has Orthologs	Cluster 1050			SimilarCytochrome P450 CYP71D313 (Panax ginseng)
AUR62001205	1	Has Orthologs	Cluster 1050			SimilarCYP71A4: Cytochrome P450 71A4 (Solanum melongena)
AUR62001206	1	Has Orthologs	Cluster 1050	Root Down		SimilarCYP71A21: Cytochrome P450 71A21 (Arabidopsis thaliana)	17.614	8.04712
AUR62001207	0	Singleton	N/A			Protein of unknown function
AUR62001208	1	Has Orthologs	Cluster 5585			SimilarCREG1: Protein CREG1 (Homo sapiens)
AUR62001209	3	Has Orthologs	Cluster 11415			Protein of unknown function
AUR62001210	10	Has Orthologs	Cluster 5586	Shoot Up		SimilarNPF5.8: Protein NRT1/ PTR FAMILY 5.8 (Arabidopsis thaliana)			3.35901	9.65118
AUR62001211	0	Has Orthologs	Cluster 11592	Shoot Up		SimilarFTRC: Ferredoxin-thioredoxin reductase catalytic chain%2C chloroplastic (Spinacia oleracea)			128.389	193.821
AUR62001212	1	Has Orthologs	Cluster 11593			Protein of unknown function
AUR62001213	0	Singleton	N/A			SimilarCyp28d1: Probable cytochrome P450 28d1 (Drosophila melanogaster)
AUR62001214	0	Quinoa Specific	Cluster 16243		Quinoa Overrepresented	SimilarCyp39a1: 24-hydroxycholesterol 7-alpha-hydroxylase (Mus musculus)
AUR62001215	0	Has Orthologs	Cluster 5587			SimilarRUB2: Ubiquitin-NEDD8-like protein RUB2 (Oryza sativa subsp. japonica)
AUR62001216	1	Has Orthologs	Cluster 1050			SimilarCYP71C2: indolin-2-one monooxygenase (Zea mays)
AUR62001217	1	Has Orthologs	Cluster 1050			SimilarCYP71A26: Cytochrome P450 71A26 (Arabidopsis thaliana)
AUR62001218	1	Has Orthologs	Cluster 1050	Shoot Up		SimilarCYP71A2: Cytochrome P450 71A2 (Solanum melongena)			5.61071	9.27332
AUR62001219	1	Has Orthologs	Cluster 1050	Shoot Up		SimilarCYP71A25: Cytochrome P450 71A25 (Arabidopsis thaliana)			2.84368	4.65177
AUR62001220	0	Has Orthologs	Cluster 14538			Protein of unknown function
AUR62001221	0	Has Orthologs	Cluster 1050			SimilarCYP79D2: Valine N-monooxygenase 2 (Manihot esculenta)
AUR62001222	0	Has Orthologs	Cluster 5589			SimilarBRAP: BRCA1-associated protein (Homo sapiens)
AUR62001223	0	Singleton	N/A			SimilarSTR11: Rhodanese-like domain-containing protein 11%2C chloroplastic (Arabidopsis thaliana)
AUR62001224	0	Has Orthologs	Cluster 5590			SimilarCYP71A9: Cytochrome P450 71A9 (Glycine max)
AUR62001225	0	Has Orthologs	Cluster 5591			SimilarARB_07867: WSC domain-containing protein ARB_07867 (Arthroderma benhamiae (strain ATCC MYA-4681 / CBS 112371))
AUR62001226	5	Singleton	N/A			SimilarAt1g61270: Lysine histidine transporter-like 3 (Arabidopsis thaliana)
AUR62001227	0	Has Orthologs	Cluster 11594			SimilarPCMP-E37: Putative pentatricopeptide repeat-containing protein At5g37570 (Arabidopsis thaliana)
AUR62001228	8	Has Orthologs	Cluster 4198		Quinoa Overrepresented	SimilarPROT1: Proline transporter 1 (Arabidopsis thaliana)
AUR62001229	0	Has Orthologs	Cluster 1174	Root Down; Shoot Down		SimilarRFS2: Probable galactinol--sucrose galactosyltransferase 2 (Arabidopsis thaliana)	12.6057	4.59812	4.06839	0.810563
AUR62001230	0	Has Orthologs	Cluster 3739			Similar28 kDa ribonucleoprotein%2C chloroplastic (Spinacia oleracea)
AUR62001231	0	Has Orthologs	Cluster 5592			SimilarPCM: Protein-L-isoaspartate O-methyltransferase (Triticum aestivum)
AUR62001232	0	Has Orthologs	Cluster 1175		Quinoa Overrepresented	SimilarSEOB: Protein SIEVE ELEMENT OCCLUSION B (Arabidopsis thaliana)
AUR62001233	2	Has Orthologs	Cluster 13460	Root Down; Shoot Down		SimilarSOBIR1: Leucine-rich repeat receptor-like serine/threonine/tyrosine-protein kinase SOBIR1 (Arabidopsis thaliana)	6.04202	0.458045	24.0322	7.66039
AUR62001234	0	Has Orthologs	Cluster 13461			SimilarSTRA13: Centromere protein X (Bos taurus)
AUR62001235	0	Has Orthologs	Cluster 11595			SimilarBtrc: F-box/WD repeat-containing protein 1A (Mus musculus)
AUR62001236	0	Quinoa Specific	Cluster 16244		Quinoa Overrepresented	SimilarPUB4: U-box domain-containing protein 4 (Arabidopsis thaliana)
AUR62001237	1	Singleton	N/A			Protein of unknown function
AUR62001238	0	Quinoa Specific	Cluster 16244		Quinoa Overrepresented	Protein of unknown function
AUR62001239	0	Quinoa Specific	Cluster 1338		Quinoa Overrepresented	Protein of unknown function
AUR62001240	0	Singleton	N/A			Protein of unknown function
AUR62001241	0	Singleton	N/A			SimilarLOX1.3: Probable linoleate 9S-lipoxygenase 3 (Solanum tuberosum)
AUR62001242	0	Has Orthologs	Cluster 1000		Quinoa Overrepresented	SimilarPutative AC9 transposase (Zea mays)
AUR62001243	0	Has Orthologs	Cluster 1000		Quinoa Overrepresented	SimilarPutative AC transposase (Zea mays)
AUR62001244	1	Has Orthologs	Cluster 1421	Shoot Down		Protein of unknown function			82.4581	13.6841
AUR62001245	1	Has Orthologs	Cluster 1421	Root Up; Shoot Down		Protein of unknown function	951.681	1773.77	147.675	44.6042
AUR62001246	1	Singleton	N/A			Protein of unknown function
AUR62001247	0	Singleton	N/A			Similarpif1: ATP-dependent DNA helicase PIF1 (Xenopus laevis)
AUR62001248	0	Has Orthologs	Cluster 3738			Similarabhd17c: Alpha/beta hydrolase domain-containing protein 17C (Danio rerio)
AUR62001249	0	Has Orthologs	Cluster 4199			SimilarCTSB: Cathepsin B (Macaca fascicularis)
AUR62001250	0	Has Orthologs	Cluster 3737			SimilarATG16: Autophagy-related protein 16 (Arabidopsis thaliana)
AUR62001251	0	Has Orthologs	Cluster 2905	Shoot Down	Quinoa Overrepresented	SimilarCEP1: KDEL-tailed cysteine endopeptidase CEP1 (Arabidopsis thaliana)			9.11242	0.523446
AUR62001252	0	Has Orthologs	Cluster 13462			SimilarPeptide methionine sulfoxide reductase (Fragaria ananassa)
AUR62001253	0	Has Orthologs	Cluster 5593			SimilarBT2: BTB/POZ and TAZ domain-containing protein 2 (Arabidopsis thaliana)
AUR62001254	1	Has Orthologs	Cluster 1090	Shoot Down		SimilarAt4g24780: Probable pectate lyase 18 (Arabidopsis thaliana)			33.2968	5.23726
AUR62001255	0	Has Orthologs	Cluster 5594			SimilarARID3: AT-rich interactive domain-containing protein 3 (Arabidopsis thaliana)
AUR62001256	0	Has Orthologs	Cluster 2512		Quinoa Overrepresented (with Beet)	SimilarAt4g24790: Protein STICHEL-like 2 (Arabidopsis thaliana)
AUR62001257	0	Has Orthologs	Cluster 2512		Quinoa Overrepresented (with Beet)	SimilarAt3g48380: Probable Ufm1-specific protease (Arabidopsis thaliana)
AUR62001258	0	Has Orthologs	Cluster 5595			SimilarEMB1006: Pentatricopeptide repeat-containing protein At5g50280%2C chloroplastic (Arabidopsis thaliana)
AUR62001259	0	Has Orthologs	Cluster 2016			SimilarPDCD4: Programmed cell death protein 4 (Gallus gallus)
AUR62001260	0	Has Orthologs	Cluster 5596			SimilarOgt: UDP-N-acetylglucosamine--peptide N-acetylglucosaminyltransferase 110 kDa subunit (Rattus norvegicus)
AUR62001261	4	Has Orthologs	Cluster 15208			SimilarPSBY: Photosystem II core complex proteins psbY%2C chloroplastic (Spinacia oleracea)
AUR62001262	0	Singleton	N/A			Protein of unknown function
AUR62001263	0	Has Orthologs	Cluster 5597	Shoot Up		SimilarAt3g48420: Haloacid dehalogenase-like hydrolase domain-containing protein At3g48420 (Arabidopsis thaliana)			146.492	218.602
AUR62001264	0	Singleton	N/A			SimilarAPE1L: DNA-(apurinic or apyrimidinic site) lyase (Arabidopsis thaliana)
AUR62001265	0	Has Orthologs	Cluster 5598			SimilarREF6: Lysine-specific demethylase REF6 (Arabidopsis thaliana)
AUR62001266	0	Has Orthologs	Cluster 5599			SimilarAt3g48440: Zinc finger CCCH domain-containing protein 43 (Arabidopsis thaliana)
AUR62001267	8	Has Orthologs	Cluster 1067			SimilarCALS10: Callose synthase 10 (Arabidopsis thaliana)
AUR62001268	5	Singleton	N/A			SimilarTrpa1: Transient receptor potential cation channel subfamily A member 1 (Rattus norvegicus)
AUR62001269	1	Has Orthologs	Cluster 5600			SimilarAt3g48460: GDSL esterase/lipase At3g48460 (Arabidopsis thaliana)
AUR62001270	0	Has Orthologs	Cluster 5601			Protein of unknown function
AUR62001271	0	Has Orthologs	Cluster 4200			SimilarOs01g0905400: B3 domain-containing protein Os01g0905400 (Oryza sativa subsp. japonica)
AUR62001272	10	Has Orthologs	Cluster 2109			Protein of unknown function
AUR62001273	12	Has Orthologs	Cluster 2109			SimilarAZG2: Adenine/guanine permease AZG2 (Arabidopsis thaliana)
AUR62001274	0	Has Orthologs	Cluster 5602			SimilarKlhdc4: Kelch domain-containing protein 4 (Mus musculus)
AUR62001275	1	Has Orthologs	Cluster 5603			Protein of unknown function
AUR62001276	0	Has Orthologs	Cluster 5604			Similarsll1917: Oxygen-independent coproporphyrinogen-III oxidase-like protein sll1917 (Synechocystis sp. (strain PCC 6803 / Kazusa))
AUR62001277	0	Has Orthologs	Cluster 5605			SimilarHAG3: Elongator complex protein 3 (Arabidopsis thaliana)
AUR62001278	0	Has Orthologs	Cluster 5606			SimilarTelo2: Telomere length regulation protein TEL2 homolog (Mus musculus)
AUR62001279	0	Has Orthologs	Cluster 5607			SimilarrpsU1: 30S ribosomal protein S21 A (Nostoc sp. (strain PCC 7120 / UTEX 2576))
AUR62001280	0	Has Orthologs	Cluster 3736			SimilarRPN7: 26S proteasome non-ATPase regulatory subunit 6 homolog (Arabidopsis thaliana)
AUR62001281	0	Has Orthologs	Cluster 1323			SimilarCPN60B4: Chaperonin 60 subunit beta 4%2C chloroplastic (Arabidopsis thaliana)
AUR62001282	0	Has Orthologs	Cluster 1301		Quinoa Overrepresented (with Beet)	SimilarANK1: Ankyrin-1 (Homo sapiens)
AUR62001283	4	Has Orthologs	Cluster 1301		Quinoa Overrepresented (with Beet)	Protein of unknown function
AUR62001284	0	Has Orthologs	Cluster 1301		Quinoa Overrepresented (with Beet)	SimilarAnk2: Ankyrin-2 (Mus musculus)
AUR62001285	5	Has Orthologs	Cluster 1301	Root Down	Quinoa Overrepresented (with Beet)	SimilarAlpha-latroinsectotoxin-Lt1a (Fragment) (Latrodectus tredecimguttatus)	3.27488	0.976377
AUR62001286	0	Has Orthologs	Cluster 5608			SimilarADCK1: Uncharacterized aarF domain-containing protein kinase 1 (Gallus gallus)
AUR62001287	0	Singleton	N/A			SimilarNDPK2: Nucleoside diphosphate kinase 2%2C chloroplastic (Spinacia oleracea)
AUR62001288	0	Has Orthologs	Cluster 13464			Protein of unknown function
AUR62001289	1	Has Orthologs	Cluster 13463			SimilarAt3g47200: UPF0481 protein At3g47200 (Arabidopsis thaliana)
AUR62001290	1	Has Orthologs	Cluster 4149			SimilarAt3g02645: Putative UPF0481 protein At3g02645 (Arabidopsis thaliana)
AUR62001291	0	Has Orthologs	Cluster 5609			Protein of unknown function
AUR62001292	0	Has Orthologs	Cluster 5610			SimilarSDIR1: E3 ubiquitin-protein ligase SDIR1 (Arabidopsis thaliana)
AUR62001293	0	Has Orthologs	Cluster 1740			SimilarPED1: 3-ketoacyl-CoA thiolase 2%2C peroxisomal (Arabidopsis thaliana)
AUR62001294	0	Has Orthologs	Cluster 1961			SimilarAnkrd13b: Ankyrin repeat domain-containing protein 13B (Mus musculus)
AUR62001295	0	Has Orthologs	Cluster 5611			Similarcoq6: Ubiquinone biosynthesis monooxygenase COQ6%2C mitochondrial (Danio rerio)
AUR62001296	0	Has Orthologs	Cluster 2006			SimilarHAC12: Histone acetyltransferase HAC12 (Arabidopsis thaliana)
AUR62001297	0	Has Orthologs	Cluster 1984			SimilarCDT1A: CDT1-like protein a%2C chloroplastic (Arabidopsis thaliana)
AUR62001298	0	Quinoa Specific	Cluster 14530		Quinoa Overrepresented	SimilarATL6: E3 ubiquitin-protein ligase ATL6 (Arabidopsis thaliana)
AUR62001299	0	Singleton	N/A			Protein of unknown function
AUR62001300	0	Has Orthologs	Cluster 13465			SimilarIRKI: IRK-interacting protein (Arabidopsis thaliana)
AUR62001301	0	Has Orthologs	Cluster 5612			Similarder: GTPase Der (Parvibaculum lavamentivorans (strain DS-1 / DSM 13023 / NCIMB 13966))
AUR62001302	0	Has Orthologs	Cluster 5613	Root Down		SimilarGSTU8: Glutathione S-transferase U8 (Arabidopsis thaliana)	23.2544	9.18483
AUR62001303	5	Quinoa Specific	Cluster 16245		Quinoa Overrepresented	SimilarPIN1B: Probable auxin efflux carrier component 1b (Oryza sativa subsp. japonica)
AUR62001304	0	Has Orthologs	Cluster 5614			Protein of unknown function
AUR62001305	0	Has Orthologs	Cluster 5615			Protein of unknown function
AUR62001306	0	Has Orthologs	Cluster 5616			Protein of unknown function
AUR62001307	0	Has Orthologs	Cluster 5617	Shoot Up		SimilarPHL1: Protein PHR1-LIKE 1 (Arabidopsis thaliana)			9.29661	16.8411
AUR62001308	7	Has Orthologs	Cluster 1322			SimilarOCT7: Organic cation/carnitine transporter 7 (Arabidopsis thaliana)
AUR62001309	2	Has Orthologs	Cluster 5618			Protein of unknown function
AUR62001310	0	Has Orthologs	Cluster 11596			SimilarSRF5: Protein STRUBBELIG-RECEPTOR FAMILY 5 (Arabidopsis thaliana)
AUR62001311	0	Has Orthologs	Cluster 1136	Root Down	Quinoa Overrepresented	SimilarOSCBPY: Beta-amyrin synthase (Betula platyphylla)	6.83967	2.99403
AUR62001312	0	Quinoa Specific	Cluster 14537		Quinoa Overrepresented	SimilarTop3a: DNA topoisomerase 3-alpha (Mus musculus)
AUR62001313	1	Singleton	N/A			Protein of unknown function
AUR62001314	0	Has Orthologs	Cluster 1136		Quinoa Overrepresented	Similarshc: Squalene--hopene cyclase (Alicyclobacillus acidocaldarius subsp. acidocaldarius (strain ATCC 27009 / DSM 446 / JCM 5260 / NBRC 15652 / NCIMB 11725 / NRRL B-14509 / 104-1A))
AUR62001315	1	Has Orthologs	Cluster 1083		Quinoa Overrepresented	Protein of unknown function
AUR62001316	0	Quinoa Specific	Cluster 1254		Quinoa Overrepresented	Protein of unknown function
AUR62001317	1	Has Orthologs	Cluster 1771	Shoot Down		SimilarBeta-amyrin 28-oxidase (Panax ginseng)			13.7168	3.36141
AUR62001318	1	Has Orthologs	Cluster 1539		Quinoa Overrepresented	SimilarPRK4: Pollen receptor-like kinase 4 (Arabidopsis thaliana)
AUR62001319	0	Has Orthologs	Cluster 1215		Quinoa Overrepresented	SimilarPUB35: U-box domain-containing protein 35 (Arabidopsis thaliana)
AUR62001320	0	Has Orthologs	Cluster 5619			SimilarRBL: Protein RBL (Arabidopsis thaliana)
AUR62001321	0	Has Orthologs	Cluster 5620			Protein of unknown function
AUR62001322	0	Has Orthologs	Cluster 5621			SimilarTOM7-1: Mitochondrial import receptor subunit TOM7-1 (Arabidopsis thaliana)
AUR62001323	13	Has Orthologs	Cluster 3694			SimilarAVPL2: Pyrophosphate-energized membrane proton pump 3 (Arabidopsis thaliana)
AUR62001324	0	Has Orthologs	Cluster 5622			Protein of unknown function
AUR62001325	0	Has Orthologs	Cluster 11597			SimilarAt2g17570: Dehydrodolichyl diphosphate synthase 6 (Arabidopsis thaliana)
AUR62001326	1	Has Orthologs	Cluster 5623			Protein of unknown function
AUR62001327	0	Has Orthologs	Cluster 14539			SimilarARG7: Indole-3-acetic acid-induced protein ARG7 (Vigna radiata var. radiata)
AUR62001328	0	Singleton	N/A			SimilarSAUR71: Auxin-responsive protein SAUR71 (Arabidopsis thaliana)
AUR62001329	0	Has Orthologs	Cluster 5624			SimilarSEN1: Helicase SEN1 (Saccharomyces cerevisiae (strain ATCC 204508 / S288c))
AUR62001330	0	Has Orthologs	Cluster 5625			SimilarAt1g78910: RNA pseudouridine synthase 3%2C mitochondrial (Arabidopsis thaliana)
AUR62001331	2	Has Orthologs	Cluster 11598			SimilarAt3g20240: Probable mitochondrial adenine nucleotide transporter BTL1 (Arabidopsis thaliana)
AUR62001332	4	Singleton	N/A			SimilarRTNLB22: Reticulon-like protein B22 (Arabidopsis thaliana)
AUR62001333	0	Singleton	N/A			SimilarAt4g29180: Probable LRR receptor-like serine/threonine-protein kinase At4g29180 (Arabidopsis thaliana)
AUR62001334	0	Has Orthologs	Cluster 2224	Shoot Up		SimilarACD6: Protein ACCELERATED CELL DEATH 6 (Arabidopsis thaliana)			2.90494	4.62176
AUR62001335	0	Has Orthologs	Cluster 5626			SimilarAPUM5: Pumilio homolog 5 (Arabidopsis thaliana)
AUR62001336	0	Singleton	N/A			Protein of unknown function
AUR62001337	0	Has Orthologs	Cluster 5627			Protein of unknown function
AUR62001338	0	Has Orthologs	Cluster 5628			SimilarWSS1: DNA-dependent metalloprotease WSS1 (Saccharomyces cerevisiae (strain ATCC 204508 / S288c))
AUR62001339	0	Has Orthologs	Cluster 15209	Shoot Up		Protein of unknown function			18.3135	33.5981
AUR62001340	2	Has Orthologs	Cluster 4201			SimilarFAM32A: Protein FAM32A (Pongo abelii)
AUR62001341	8	Has Orthologs	Cluster 5629	Shoot Down		SimilarDWF5: 7-dehydrocholesterol reductase (Arabidopsis thaliana)			48.0618	33.8381
AUR62001342	0	Has Orthologs	Cluster 5630			SimilarAt3g06530: Uncharacterized protein At3g06530 (Arabidopsis thaliana)
AUR62001343	0	Has Orthologs	Cluster 5631			SimilarMED8: Mediator of RNA polymerase II transcription subunit 8 (Arabidopsis thaliana)
AUR62001344	1	Singleton	N/A			Protein of unknown function
AUR62001345	0	Has Orthologs	Cluster 5632			Protein of unknown function
AUR62001346	0	Has Orthologs	Cluster 5633			SimilarVPS11: Vacuolar protein-sorting-associated protein 11 homolog (Arabidopsis thaliana)
AUR62001347	0	Singleton	N/A			Protein of unknown function
AUR62001348	1	Has Orthologs	Cluster 1198			SimilarPER60: Peroxidase 60 (Arabidopsis thaliana)
AUR62001349	0	Has Orthologs	Cluster 17983		Quinoa Overrepresented (with Beet)	SimilarEXPA22: Expansin-A22 (Arabidopsis thaliana)
AUR62001350	0	Has Orthologs	Cluster 5634			SimilarAt3g27220: Kelch repeat-containing protein At3g27220 (Arabidopsis thaliana)
AUR62001351	0	Has Orthologs	Cluster 5635			SimilarAt1g51550: F-box/kelch-repeat protein At1g51550 (Arabidopsis thaliana)
AUR62001352	0	Has Orthologs	Cluster 11599			SimilarLBD24: LOB domain-containing protein 24 (Arabidopsis thaliana)
AUR62001353	0	Has Orthologs	Cluster 5636			Protein of unknown function
AUR62001354	0	Has Orthologs	Cluster 4202			SimilarBBX32: B-box zinc finger protein 32 (Arabidopsis thaliana)
AUR62001355	0	Has Orthologs	Cluster 5637			SimilarAt4g18375: KH domain-containing protein At4g18375 (Arabidopsis thaliana)
AUR62001356	0	Has Orthologs	Cluster 11327			SimilarGATA24: GATA transcription factor 24 (Arabidopsis thaliana)
AUR62001357	1	Has Orthologs	Cluster 3695			SimilarMNS1: Mannosyl-oligosaccharide 1%2C2-alpha-mannosidase MNS1 (Arabidopsis thaliana)
AUR62001358	4	Has Orthologs	Cluster 5638			SimilarMTPC4: Metal tolerance protein C4 (Arabidopsis thaliana)
AUR62001359	9	Has Orthologs	Cluster 1058			SimilarACA9: Calcium-transporting ATPase 9%2C plasma membrane-type (Arabidopsis thaliana)
AUR62001360	0	Has Orthologs	Cluster 3863	Shoot Down		Protein of unknown function			40.156	25.4887
AUR62001361	0	Singleton	N/A			SimilarrpsQ: 30S ribosomal protein S17 (Corynebacterium glutamicum (strain ATCC 13032 / DSM 20300 / JCM 1318 / LMG 3730 / NCIMB 10025))
AUR62001362	0	Has Orthologs	Cluster 5639			SimilarAt4g31480: Coatomer subunit beta-1 (Arabidopsis thaliana)
AUR62001363	0	Has Orthologs	Cluster 2031			SimilarEXO70A1: Exocyst complex component EXO70A1 (Arabidopsis thaliana)
AUR62001364	0	Has Orthologs	Cluster 2513			SimilarFAHD1: Acylpyruvase FAHD1%2C mitochondrial (Bos taurus)
AUR62001365	0	Has Orthologs	Cluster 2869		Quinoa Overrepresented (with Beet)	SimilarNAC025: NAC transcription factor 25 (Arabidopsis thaliana)
AUR62001366	0	Has Orthologs	Cluster 5640			SimilarEDD1: Glycine--tRNA ligase%2C chloroplastic/mitochondrial 2 (Arabidopsis thaliana)
AUR62001367	0	Has Orthologs	Cluster 5641			SimilarrplL: 50S ribosomal protein L7/L12 (Chlorobium limicola (strain DSM 245 / NBRC 103803))
AUR62001368	0	Has Orthologs	Cluster 5642			Protein of unknown function
AUR62001369	0	Has Orthologs	Cluster 2906		Quinoa Overrepresented	SimilarMTK: Methylthioribose kinase (Arabidopsis thaliana)
AUR62001370	5	Has Orthologs	Cluster 1461	Shoot Down		SimilarCSLC5: Probable xyloglucan glycosyltransferase 5 (Arabidopsis thaliana)			13.3932	8.6077
AUR62001371	2	Singleton	N/A			SimilarAt1g57610: Calcium uniporter protein 5%2C mitochondrial (Arabidopsis thaliana)
AUR62001372	7	Has Orthologs	Cluster 11600			SimilarAVT1: Vacuolar amino acid transporter 1 (Saccharomyces cerevisiae (strain ATCC 204508 / S288c))
AUR62001373	0	Has Orthologs	Cluster 5643			SimilarPCMP-H87: Pentatricopeptide repeat-containing protein At3g24000%2C mitochondrial (Arabidopsis thaliana)
AUR62001374	0	Has Orthologs	Cluster 1632			SimilarEXO84B: Exocyst complex component EXO84B (Arabidopsis thaliana)
AUR62001375	0	Has Orthologs	Cluster 5644			SimilarTOM40-1: Mitochondrial import receptor subunit TOM40-1 (Arabidopsis thaliana)
AUR62001376	1	Has Orthologs	Cluster 1245	Root Down	Quinoa Overrepresented	SimilarPSYR1: Tyrosine-sulfated glycopeptide receptor 1 (Arabidopsis thaliana)	22.1763	10.2089
AUR62001377	2	Has Orthologs	Cluster 5645			SimilarSPAC630.12: Uncharacterized protein C630.12 (Schizosaccharomyces pombe (strain 972 / ATCC 24843))
AUR62001378	0	Singleton	N/A			SimilarTBL24: Protein trichome birefringence-like 24 (Arabidopsis thaliana)
AUR62001379	0	Has Orthologs	Cluster 4203		Quinoa Overrepresented	SimilarYrdc: YrdC domain-containing protein%2C mitochondrial (Rattus norvegicus)
AUR62001380	7	Has Orthologs	Cluster 1052		Quinoa Overrepresented	SimilarAHA10: ATPase 10%2C plasma membrane-type (Arabidopsis thaliana)
AUR62001381	1	Has Orthologs	Cluster 13466			Protein of unknown function
AUR62001382	0	Has Orthologs	Cluster 5646			SimilarPDS: 15-cis-phytoene desaturase%2C chloroplastic/chromoplastic (Arabidopsis thaliana)
AUR62001383	2	Has Orthologs	Cluster 13467			Protein of unknown function
AUR62001384	5	Has Orthologs	Cluster 2067	Shoot Up	Quinoa Overrepresented	SimilarCYP51G1: Sterol 14-demethylase (Arabidopsis thaliana)			3.50555	5.42954
AUR62001385	1	Has Orthologs	Cluster 11601			SimilarfaeA: Probable feruloyl esterase A (Aspergillus flavus (strain ATCC 200026 / FGSC A1120 / NRRL 3357 / JCM 12722 / SRRC 167))
AUR62001386	1	Has Orthologs	Cluster 3341			SimilarSRF7: Protein STRUBBELIG-RECEPTOR FAMILY 7 (Arabidopsis thaliana)
AUR62001387	0	Has Orthologs	Cluster 5647			SimilarAt1g19340: Methyltransferase-like protein 2 (Arabidopsis thaliana)
AUR62001388	0	Has Orthologs	Cluster 1952			SimilarRPT1: 26S protease regulatory subunit 7 (Spinacia oleracea)
AUR62001389	0	Has Orthologs	Cluster 1245		Quinoa Overrepresented	SimilarDRT100: DNA-damage-repair/toleration protein DRT100 (Arabidopsis thaliana)
AUR62001390	1	Has Orthologs	Cluster 1245		Quinoa Overrepresented	SimilarLrrc30: Leucine-rich repeat-containing protein 30 (Mus musculus)
AUR62001391	1	Has Orthologs	Cluster 5648			SimilarSPAC23H3.12c: Uncharacterized protein C23H3.12c (Schizosaccharomyces pombe (strain 972 / ATCC 24843))
AUR62001392	0	Has Orthologs	Cluster 1078		Quinoa Overrepresented	Protein of unknown function
AUR62001393	0	Has Orthologs	Cluster 1078		Quinoa Overrepresented	Protein of unknown function
AUR62001394	1	Has Orthologs	Cluster 5649			Protein of unknown function
AUR62001395	0	Has Orthologs	Cluster 4204		Quinoa Overrepresented	SimilarATL60: RING-H2 finger protein ATL60 (Arabidopsis thaliana)
AUR62001396	0	Has Orthologs	Cluster 1036		Quinoa Overrepresented	Protein of unknown function
AUR62001397	0	Quinoa Specific	Cluster 16246		Quinoa Overrepresented	Protein of unknown function
AUR62001398	0	Has Orthologs	Cluster 13468	Shoot Up		SimilarAt2g39540: Gibberellin-regulated protein 8 (Arabidopsis thaliana)			97.6379	219.691
AUR62001399	0	Has Orthologs	Cluster 15210	Root Up		SimilarGASA9: Gibberellin-regulated protein 9 (Arabidopsis thaliana)	15.2828	41.1411
AUR62001400	1	Has Orthologs	Cluster 3340			SimilarUBC34: Ubiquitin-conjugating enzyme E2 34 (Arabidopsis thaliana)
AUR62001401	1	Has Orthologs	Cluster 15470			Protein of unknown function
AUR62001402	0	Has Orthologs	Cluster 4205		Quinoa Overrepresented	SimilarAPUM23: Pumilio homolog 23 (Arabidopsis thaliana)
AUR62001403	2	Has Orthologs	Cluster 1281	Root Down; Shoot Down		SimilarPectinesterase 3 (Citrus sinensis)	29.7175	17.2169	6.01376	3.50031
AUR62001404	0	Has Orthologs	Cluster 2371		Quinoa Overrepresented	SimilarALAAT2: Alanine aminotransferase 2%2C mitochondrial (Arabidopsis thaliana)
AUR62001405	0	Singleton	N/A			SimilarACS7: 1-aminocyclopropane-1-carboxylate synthase 7 (Arabidopsis thaliana)
AUR62001406	0	Has Orthologs	Cluster 1490		Quinoa Overrepresented	SimilarGIP: Copia protein (Drosophila melanogaster)
AUR62001407	0	Singleton	N/A			SimilaryugH: Putative aminotransferase YugH (Bacillus subtilis (strain 168))
AUR62001408	0	Has Orthologs	Cluster 5650			SimilarAt3g61260: Uncharacterized protein At3g61260 (Arabidopsis thaliana)
AUR62001409	2	Has Orthologs	Cluster 5651			SimilarPCMP-E5: Putative pentatricopeptide repeat-containing protein At1g77010%2C mitochondrial (Arabidopsis thaliana)
AUR62001410	0	Has Orthologs	Cluster 1353			SimilarFAB1B: 1-phosphatidylinositol-3-phosphate 5-kinase FAB1B (Arabidopsis thaliana)
AUR62001411	0	Quinoa Specific	Cluster 16247		Quinoa Overrepresented	SimilarFAB1B: 1-phosphatidylinositol-3-phosphate 5-kinase FAB1B (Arabidopsis thaliana)
AUR62001412	0	Has Orthologs	Cluster 2668			SimilarAt3g14260: Protein LURP-one-related 11 (Arabidopsis thaliana)
AUR62001413	0	Has Orthologs	Cluster 5652			Similareif2b1: Translation initiation factor eIF-2B subunit alpha (Dictyostelium discoideum)
AUR62001414	0	Has Orthologs	Cluster 11602			Protein of unknown function
AUR62001415	0	Has Orthologs	Cluster 15211			Protein of unknown function
AUR62001416	0	Has Orthologs	Cluster 5653			SimilarARID4: AT-rich interactive domain-containing protein 4 (Arabidopsis thaliana)
AUR62001417	0	Has Orthologs	Cluster 2869		Quinoa Overrepresented (with Beet)	Similarrnf217: Probable E3 ubiquitin-protein ligase RNF217 (Xenopus laevis)
AUR62001418	0	Singleton	N/A			Protein of unknown function
AUR62001419	0	Has Orthologs	Cluster 1006		Quinoa Overrepresented	SimilarSBT1.5: Subtilisin-like protease SBT1.5 (Arabidopsis thaliana)
AUR62001420	0	Has Orthologs	Cluster 3339	Shoot Down		SimilarRAP2-2: Ethylene-responsive transcription factor RAP2-2 (Arabidopsis thaliana)			59.8826	41.8881
AUR62001421	0	Has Orthologs	Cluster 5654			SimilarGLIP5: GDSL esterase/lipase 5 (Arabidopsis thaliana)
AUR62001422	0	Has Orthologs	Cluster 3338			SimilarTRAB1: bZIP transcription factor TRAB1 (Oryza sativa subsp. japonica)
AUR62001423	0	Has Orthologs	Cluster 5655	Shoot Up		Protein of unknown function			137.122	245.509
AUR62001424	1	Singleton	N/A			SimilarESM1: GDSL esterase/lipase ESM1 (Arabidopsis thaliana)
AUR62001425	0	Singleton	N/A	Shoot Down		SimilarAt5g03980: GDSL esterase/lipase At5g03980 (Arabidopsis thaliana)			4.35571	2.02217
AUR62001426	0	Has Orthologs	Cluster 14540		Quinoa Overrepresented	SimilarAt1g18120: GDSL esterase/lipase At1g18120 (Arabidopsis thaliana)
AUR62001427	0	Has Orthologs	Cluster 4144			SimilarMVP1: Inactive GDSL esterase/lipase-like protein 25 (Arabidopsis thaliana)
AUR62001428	0	Has Orthologs	Cluster 1135	Root Down		SimilarFOX1: Flavin-dependent oxidoreductase FOX1 (Arabidopsis thaliana)	6.45053	1.75511
AUR62001429	0	Has Orthologs	Cluster 1261			SimilarSAC2: Phosphoinositide phosphatase SAC2 (Arabidopsis thaliana)
AUR62001430	0	Has Orthologs	Cluster 1261			SimilarSac1: Phosphatidylinositide phosphatase SAC1 (Drosophila melanogaster)
AUR62001431	0	Has Orthologs	Cluster 3801			SimilarRAP40: 40S ribosomal protein SA (Cicer arietinum)
AUR62001432	0	Has Orthologs	Cluster 2907			SimilarCebpz: CCAAT/enhancer-binding protein zeta (Mus musculus)
AUR62001433	0	Has Orthologs	Cluster 5656			SimilarHSP18.6: 18.6 kDa class III heat shock protein (Oryza sativa subsp. japonica)
AUR62001434	0	Has Orthologs	Cluster 5657			SimilarSAUR41: Auxin-responsive protein SAUR41 (Arabidopsis thaliana)
AUR62001435	0	Has Orthologs	Cluster 5658			SimilarDNAJB6: DnaJ homolog subfamily B member 6 (Macaca fascicularis)
AUR62001436	0	Has Orthologs	Cluster 13469			SimilarASIL2: Trihelix transcription factor ASIL2 (Arabidopsis thaliana)
AUR62001437	0	Has Orthologs	Cluster 3337			Protein of unknown function
AUR62001438	0	Has Orthologs	Cluster 5659			Protein of unknown function
AUR62001439	0	Has Orthologs	Cluster 1135			SimilarFOX1: Flavin-dependent oxidoreductase FOX1 (Arabidopsis thaliana)
AUR62001440	0	Has Orthologs	Cluster 4916			SimilarOs10g0391300: Zinc finger CCCH domain-containing protein 62 (Oryza sativa subsp. japonica)
AUR62001441	0	Has Orthologs	Cluster 5660			SimilarGLO4: Peroxisomal (S)-2-hydroxy-acid oxidase GLO4 (Arabidopsis thaliana)
AUR62001442	0	Has Orthologs	Cluster 5661			Protein of unknown function
AUR62001443	0	Has Orthologs	Cluster 4206			SimilarNUP107: Nuclear pore complex protein NUP107 (Arabidopsis thaliana)
AUR62001444	1	Has Orthologs	Cluster 5662	Shoot Up		SimilarFLU: Protein FLUORESCENT IN BLUE LIGHT%2C chloroplastic (Arabidopsis thaliana)			17.0309	26.0196
AUR62001445	0	Has Orthologs	Cluster 2174			SimilarUBP1B: Oligouridylate-binding protein 1B (Arabidopsis thaliana)
AUR62001446	0	Has Orthologs	Cluster 5663	Shoot Down		SimilarTIFY10A: Protein TIFY 10A (Arabidopsis thaliana)			24.4571	13.0343
AUR62001447	1	Has Orthologs	Cluster 11603			SimilarPRK3: Pollen receptor-like kinase 3 (Arabidopsis thaliana)
AUR62001448	0	Has Orthologs	Cluster 5664			SimilarEXO70A1: Exocyst complex component EXO70A1 (Arabidopsis thaliana)
AUR62001449	5	Has Orthologs	Cluster 2043			Similartmem87a: Transmembrane protein 87A (Xenopus tropicalis)
AUR62001450	0	Has Orthologs	Cluster 13471			SimilarLSM1B: Sm-like protein LSM1B (Arabidopsis thaliana)
AUR62001451	0	Has Orthologs	Cluster 4207			Protein of unknown function
AUR62001452	0	Has Orthologs	Cluster 13470			SimilarAt1g17410: Probable nucleoside diphosphate kinase 5 (Arabidopsis thaliana)
AUR62001453	0	Singleton	N/A			Protein of unknown function
AUR62001454	0	Has Orthologs	Cluster 1941			SimilarDDB_G0292028: von Willebrand factor A domain-containing protein DDB_G0292028 (Dictyostelium discoideum)
AUR62001455	0	Has Orthologs	Cluster 2080			SimilarDAGLA: Sn1-specific diacylglycerol lipase alpha (Homo sapiens)
AUR62001456	0	Has Orthologs	Cluster 2514	Shoot Up	Quinoa Overrepresented	Protein of unknown function			7.35114	17.3336
AUR62001457	3	Singleton	N/A			Protein of unknown function
AUR62001458	0	Has Orthologs	Cluster 1006		Quinoa Overrepresented	SimilarSBT1.4: Subtilisin-like protease SBT1.4 (Arabidopsis thaliana)
AUR62001459	0	Has Orthologs	Cluster 1006		Quinoa Overrepresented	SimilarSBT3.8: Subtilisin-like protease SBT3.8 (Arabidopsis thaliana)
AUR62001460	0	Has Orthologs	Cluster 1006	Shoot Up	Quinoa Overrepresented	SimilarSBT1.4: Subtilisin-like protease SBT1.4 (Arabidopsis thaliana)			7.60885	27.9793
AUR62001461	1	Has Orthologs	Cluster 1006		Quinoa Overrepresented	Similarpls: Pyrolysin (Pyrococcus furiosus (strain ATCC 43587 / DSM 3638 / JCM 8422 / Vc1))
AUR62001462	0	Has Orthologs	Cluster 4208			Protein of unknown function
AUR62001463	12	Has Orthologs	Cluster 1686		Quinoa Overrepresented	SimilarCCX4: Cation/calcium exchanger 4 (Arabidopsis thaliana)
AUR62001464	0	Has Orthologs	Cluster 5665	Root Up; Shoot Up		SimilarALDH7B4: Aldehyde dehydrogenase family 7 member B4 (Arabidopsis thaliana)	33.8533	72.5879	18.7325	27.5903
AUR62001465	0	Quinoa Specific	Cluster 16248		Quinoa Overrepresented	SimilarPCMP-A6: Pentatricopeptide repeat-containing protein At3g26630%2C chloroplastic (Arabidopsis thaliana)
AUR62001466	0	Has Orthologs	Cluster 5666			SimilarRBX1A: RING-box protein 1a (Arabidopsis thaliana)
AUR62001467	0	Has Orthologs	Cluster 1039	Shoot Down	Quinoa Overrepresented (with Beet)	SimilarLOX3.1: Linoleate 13S-lipoxygenase 3-1%2C chloroplastic (Solanum tuberosum)			17.4	8.52953
AUR62001468	1	Has Orthologs	Cluster 1540		Quinoa Overrepresented	Protein of unknown function
AUR62001469	3	Singleton	N/A			SimilarBASS2: Sodium/pyruvate cotransporter BASS2%2C chloroplastic (Arabidopsis thaliana)
AUR62001470	0	Has Orthologs	Cluster 1878		Quinoa Overrepresented (with Beet)	SimilarCDC48C: Cell division control protein 48 homolog C (Arabidopsis thaliana)
AUR62001471	1	Has Orthologs	Cluster 1540		Quinoa Overrepresented	SimilarCYP71A1: Cytochrome P450 71A1 (Persea americana)
AUR62001472	0	Has Orthologs	Cluster 1878		Quinoa Overrepresented (with Beet)	Similarnvl: Putative ribosome biogenesis ATPase nvl (Dictyostelium discoideum)
AUR62001473	0	Has Orthologs	Cluster 1280		Quinoa Overrepresented	Protein of unknown function
AUR62001474	0	Has Orthologs	Cluster 2121	Root Down		SimilarAt1g72540: Putative receptor-like protein kinase At1g72540 (Arabidopsis thaliana)	11.0201	2.6595
AUR62001475	0	Has Orthologs	Cluster 2121			SimilarAt3g01300: Receptor-like serine/threonine-protein kinase At3g01300 (Arabidopsis thaliana)
AUR62001476	0	Has Orthologs	Cluster 5667			SimilarPSD: Exportin-T (Arabidopsis thaliana)
AUR62001477	0	Has Orthologs	Cluster 5668			SimilarRSH3: Probable GTP diphosphokinase RSH3%2C chloroplastic (Arabidopsis thaliana)
AUR62001478	0	Has Orthologs	Cluster 5669			SimilarbphD: 2-hydroxy-6-oxo-6-phenylhexa-2%2C4-dienoate hydrolase (Comamonas testosteroni)
AUR62001479	2	Has Orthologs	Cluster 5670			Similarmul1: Mitochondrial ubiquitin ligase activator of nfkb 1 (Xenopus laevis)
AUR62001480	3	Singleton	N/A			SimilarAt2g25520: Probable sugar phosphate/phosphate translocator At2g25520 (Arabidopsis thaliana)
AUR62001481	0	Has Orthologs	Cluster 13472			SimilarGRF5: Growth-regulating factor 5 (Arabidopsis thaliana)
AUR62001482	0	Has Orthologs	Cluster 5671	Root Up; Shoot Up		SimilarBHLH47: Transcription factor bHLH47 (Arabidopsis thaliana)	6.9033	16.1282	4.55181	15.0881
AUR62001483	0	Singleton	N/A			Protein of unknown function
AUR62001484	0	Has Orthologs	Cluster 11604			SimilarAt5g53840: F-box/FBD/LRR-repeat protein At5g53840 (Arabidopsis thaliana)
AUR62001485	0	Singleton	N/A			Protein of unknown function
AUR62001486	0	Has Orthologs	Cluster 15212			Protein of unknown function
AUR62001487	0	Has Orthologs	Cluster 11604			SimilarAt5g54820: Putative F-box/LRR-repeat protein At5g54820 (Arabidopsis thaliana)
AUR62001488	0	Has Orthologs	Cluster 2864		Quinoa Overrepresented (with Beet)	SimilarPCMP-E84: Pentatricopeptide repeat-containing protein At3g49740 (Arabidopsis thaliana)
AUR62001489	0	Has Orthologs	Cluster 4932			SimilarGRIK2: Serine/threonine-protein kinase GRIK2 (Arabidopsis thaliana)
AUR62001490	0	Has Orthologs	Cluster 5672			Protein of unknown function
AUR62001491	0	Has Orthologs	Cluster 5673			SimilarTRP4: Telomere repeat-binding protein 4 (Arabidopsis thaliana)
AUR62001492	0	Singleton	N/A			SimilarDRG2: Developmentally-regulated G-protein 2 (Arabidopsis thaliana)
AUR62001493	9	Has Orthologs	Cluster 1105			SimilarcrnA: Nitrate transporter (Emericella nidulans (strain FGSC A4 / ATCC 38163 / CBS 112.46 / NRRL 194 / M139))
AUR62001494	0	Has Orthologs	Cluster 5674			SimilarNLP3: Omega-amidase%2C chloroplastic (Arabidopsis thaliana)
AUR62001495	11	Has Orthologs	Cluster 1105			SimilarNRT2.3: High-affinity nitrate transporter 2.3 (Oryza sativa subsp. japonica)
AUR62001496	10	Has Orthologs	Cluster 1105			SimilarNRT2.1: High-affinity nitrate transporter 2.1 (Arabidopsis thaliana)
AUR62001497	0	Singleton	N/A			SimilarAt3g13980: Protein BIG GRAIN 1-like A (Arabidopsis thaliana)
AUR62001498	0	Has Orthologs	Cluster 5675			Protein of unknown function
AUR62001499	0	Has Orthologs	Cluster 5676			SimilarBRXL2: Protein Brevis radix-like 2 (Arabidopsis thaliana)
AUR62001500	0	Singleton	N/A			Protein of unknown function
AUR62001501	1	Has Orthologs	Cluster 1942			SimilarPDAT1: Phospholipid:diacylglycerol acyltransferase 1 (Arabidopsis thaliana)
AUR62001502	0	Has Orthologs	Cluster 5677			SimilarNFYA3: Nuclear transcription factor Y subunit A-3 (Arabidopsis thaliana)
AUR62001503	0	Singleton	N/A	Shoot Up		SimilarAL5: PHD finger protein ALFIN-LIKE 5 (Arabidopsis thaliana)			4.61294	9.31272
AUR62001504	3	Has Orthologs	Cluster 5678			SimilarSLC25A44: Solute carrier family 25 member 44 (Pongo abelii)
AUR62001505	4	Has Orthologs	Cluster 2881		Quinoa Overrepresented (with Beet)	SimilarAnk2: Ankyrin-2 (Mus musculus)
AUR62001506	0	Has Orthologs	Cluster 2881		Quinoa Overrepresented (with Beet)	SimilarAt2g01680: Ankyrin repeat-containing protein At2g01680 (Arabidopsis thaliana)
AUR62001507	0	Has Orthologs	Cluster 4145			Similarmdn1: Midasin (Dictyostelium discoideum)
AUR62001508	0	Has Orthologs	Cluster 1047			SimilarXI-K: Myosin-17 (Arabidopsis thaliana)
AUR62001509	2	Has Orthologs	Cluster 5679			Protein of unknown function
AUR62001510	0	Has Orthologs	Cluster 2667			Similarrpa49: DNA-directed RNA polymerase I subunit rpa49 (Schizosaccharomyces pombe (strain 972 / ATCC 24843))
AUR62001511	0	Singleton	N/A			Protein of unknown function
AUR62001512	0	Has Orthologs	Cluster 2498			SimilarPUB35: U-box domain-containing protein 35 (Arabidopsis thaliana)
AUR62001513	0	Has Orthologs	Cluster 2498			SimilarPUB52: U-box domain-containing protein 52 (Arabidopsis thaliana)
AUR62001514	0	Has Orthologs	Cluster 1141			SimilarAt4g26100: Casein kinase I isoform delta-like (Arabidopsis thaliana)
AUR62001515	8	Has Orthologs	Cluster 1061	Shoot Down	Quinoa Overrepresented	SimilarALA4: Probable phospholipid-transporting ATPase 4 (Arabidopsis thaliana)			6.51699	3.79623
AUR62001516	0	Singleton	N/A			SimilarAt4g08520: Coatomer subunit zeta-3 (Arabidopsis thaliana)
AUR62001517	0	Has Orthologs	Cluster 5680			SimilarSLC25A16: Graves disease carrier protein (Homo sapiens)
AUR62001518	1	Singleton	N/A			Protein of unknown function
AUR62001519	0	Has Orthologs	Cluster 5681			Protein of unknown function
AUR62001520	0	Has Orthologs	Cluster 5682			SimilarIQD1: Protein IQ-DOMAIN 1 (Arabidopsis thaliana)
AUR62001521	0	Has Orthologs	Cluster 5683			SimilarVAMP714: Vesicle-associated membrane protein 714 (Arabidopsis thaliana)
AUR62001522	0	Has Orthologs	Cluster 14541		Quinoa Overrepresented	SimilarNAC090: NAC domain-containing protein 90 (Arabidopsis thaliana)
AUR62001523	0	Singleton	N/A			Protein of unknown function
AUR62001524	0	Has Orthologs	Cluster 5684			SimilarOtud5: OTU domain-containing protein 5 (Rattus norvegicus)
AUR62001525	0	Singleton	N/A			SimilarAt1g08370: mRNA-decapping enzyme-like protein (Arabidopsis thaliana)
AUR62001526	1	Has Orthologs	Cluster 5685			Similarncl1: Nicalin-1 (Danio rerio)
AUR62001527	0	Has Orthologs	Cluster 15213			Similarppp1r7: Protein phosphatase 1 regulatory subunit 7 (Xenopus tropicalis)
AUR62001528	0	Has Orthologs	Cluster 5686	Root Down		SimilarPSAO: Photosystem I subunit O (Arabidopsis thaliana)	40.5517	10.4133
AUR62001529	0	Has Orthologs	Cluster 5687			SimilarAt5g41620: Uncharacterized protein At5g41620 (Arabidopsis thaliana)
AUR62001530	0	Has Orthologs	Cluster 5688			SimilarNIT4A: Bifunctional nitrilase/nitrile hydratase NIT4A (Nicotiana tabacum)
AUR62001531	1	Has Orthologs	Cluster 5689			SimilarNAC60: NAC domain-containing protein 60 (Arabidopsis thaliana)
AUR62001532	0	Has Orthologs	Cluster 11605			SimilarAt1g02270: Uncharacterized calcium-binding protein At1g02270 (Arabidopsis thaliana)
AUR62001533	0	Singleton	N/A			SimilarUEV1D: Ubiquitin-conjugating enzyme E2 variant 1D (Arabidopsis thaliana)
AUR62001534	0	Has Orthologs	Cluster 5690	Root Down		SimilarCAF1-11: Probable CCR4-associated factor 1 homolog 11 (Arabidopsis thaliana)	15.3926	4.79561
AUR62001535	0	Has Orthologs	Cluster 14542			SimilarOFP8: Transcription repressor OFP8 (Arabidopsis thaliana)
AUR62001536	1	Has Orthologs	Cluster 5691	Shoot Up		SimilarFAM210B: Protein FAM210B (Homo sapiens)			66.8353	131.12
AUR62001537	0	Has Orthologs	Cluster 2048			SimilarE2FB: Transcription factor E2FB (Arabidopsis thaliana)
AUR62001538	0	Has Orthologs	Cluster 2048			SimilarE2f2: Transcription factor E2F2 (Drosophila melanogaster)
AUR62001539	0	Quinoa Specific	Cluster 11606		Quinoa Overrepresented	Protein of unknown function
AUR62001540	0	Has Orthologs	Cluster 14543			SimilarSAUR71: Auxin-responsive protein SAUR71 (Arabidopsis thaliana)
AUR62001541	0	Has Orthologs	Cluster 1467			SimilarXRN3: 5'-3' exoribonuclease 3 (Arabidopsis thaliana)
AUR62001542	1	Has Orthologs	Cluster 3992	Shoot Down		SimilarYLS9: Protein YLS9 (Arabidopsis thaliana)			41.5316	27.4999
AUR62001543	1	Has Orthologs	Cluster 4209		Quinoa Overrepresented	SimilarAt1g08160: Uncharacterized protein At1g08160 (Arabidopsis thaliana)
AUR62001544	0	Has Orthologs	Cluster 5692			SimilarNEK5: Serine/threonine-protein kinase Nek5 (Arabidopsis thaliana)
AUR62001545	1	Has Orthologs	Cluster 5693			SimilarPDE247: Pentatricopeptide repeat-containing protein At1g05750%2C chloroplastic (Arabidopsis thaliana)
AUR62001546	0	Has Orthologs	Cluster 5694			SimilarPCMP-H52: Putative pentatricopeptide repeat-containing protein At3g11460 (Arabidopsis thaliana)
AUR62001547	1	Has Orthologs	Cluster 1073		Quinoa Overrepresented	SimilarTMK3: Receptor-like kinase TMK3 (Arabidopsis thaliana)
AUR62001548	0	Has Orthologs	Cluster 5695			SimilarHDA8: Histone deacetylase 8 (Arabidopsis thaliana)
AUR62001549	6	Has Orthologs	Cluster 11607			SimilarALMT2: Aluminum-activated malate transporter 2 (Arabidopsis thaliana)
AUR62001550	5	Singleton	N/A			SimilarALMT11: Putative aluminum-activated malate transporter 11 (Arabidopsis thaliana)
AUR62001551	5	Has Orthologs	Cluster 2908	Shoot Up	Quinoa Overrepresented	SimilarALMT3: Putative aluminum-activated malate transporter 3 (Arabidopsis thaliana)			1.13996	5.08294
AUR62001552	2	Has Orthologs	Cluster 4210			SimilarLHW: Transcription factor LHW (Arabidopsis thaliana)
AUR62001553	0	Has Orthologs	Cluster 5696	Root Down		SimilarBLH1: BEL1-like homeodomain protein 1 (Arabidopsis thaliana)	8.59773	1.28286
AUR62001554	0	Has Orthologs	Cluster 5697			SimilarR3hcc1l: Coiled-coil domain-containing protein R3HCC1L (Mus musculus)
AUR62001555	0	Has Orthologs	Cluster 15214			SimilarPUB24: E3 ubiquitin-protein ligase PUB24 (Arabidopsis thaliana)
AUR62001556	0	Has Orthologs	Cluster 5698			SimilarPUB23: E3 ubiquitin-protein ligase PUB23 (Arabidopsis thaliana)
AUR62001557	0	Singleton	N/A			SimilarDNAJC8: DnaJ homolog subfamily C member 8 (Homo sapiens)
AUR62001558	0	Has Orthologs	Cluster 1824			SimilarBSL3: Serine/threonine-protein phosphatase BSL3 (Arabidopsis thaliana)
AUR62001559	0	Has Orthologs	Cluster 1627		Quinoa Overrepresented	SimilarMET3: DNA (cytosine-5)-methyltransferase 3 (Arabidopsis thaliana)
AUR62001560	0	Singleton	N/A			SimilarMET2: DNA (cytosine-5)-methyltransferase 2 (Arabidopsis thaliana)
AUR62001561	0	Has Orthologs	Cluster 1627		Quinoa Overrepresented	SimilarMET1B: DNA (cytosine-5)-methyltransferase 1B (Oryza sativa subsp. japonica)
AUR62001562	0	Has Orthologs	Cluster 5699			SimilarCCT6A: T-complex protein 1 subunit zeta 1 (Arabidopsis thaliana)
AUR62001563	0	Has Orthologs	Cluster 5700			SimilarLSG1-2: GTPase LSG1-2 (Arabidopsis thaliana)
AUR62001564	0	Has Orthologs	Cluster 5701	Shoot Up		SimilarOEP80: Outer envelope protein 80%2C chloroplastic (Arabidopsis thaliana)			8.01077	13.3025
AUR62001565	0	Has Orthologs	Cluster 5702			Protein of unknown function
AUR62001566	0	Has Orthologs	Cluster 5703			SimilarIQD1: Protein IQ-DOMAIN 1 (Arabidopsis thaliana)
AUR62001567	0	Quinoa Specific	Cluster 1106		Quinoa Overrepresented	Protein of unknown function
AUR62001568	0	Quinoa Specific	Cluster 1337		Quinoa Overrepresented	Protein of unknown function
AUR62001569	0	Has Orthologs	Cluster 1468	Shoot Up		SimilarDnaJ protein homolog ANJ1 (Atriplex nummularia)			26.5337	38.3944
AUR62001570	0	Has Orthologs	Cluster 5704			SimilarAt1g49730: Probable receptor-like protein kinase At1g49730 (Arabidopsis thaliana)
AUR62001571	0	Has Orthologs	Cluster 5705			Protein of unknown function
AUR62001572	0	Has Orthologs	Cluster 13473			SimilarDDB_G0282179: Putative phosphatidylglycerol/phosphatidylinositol transfer protein DDB_G0282179 (Dictyostelium discoideum)
AUR62001573	0	Has Orthologs	Cluster 1298			SimilarUBP8: Ubiquitin carboxyl-terminal hydrolase 8 (Arabidopsis thaliana)
AUR62001574	0	Has Orthologs	Cluster 5706	Shoot Up		SimilarYAB2: Putative axial regulator YABBY 2 (Arabidopsis thaliana)			18.6147	32.2289
AUR62001575	1	Has Orthologs	Cluster 5707			SimilarSSL3: Protein STRICTOSIDINE SYNTHASE-LIKE 3 (Arabidopsis thaliana)
AUR62001576	0	Has Orthologs	Cluster 5708			SimilarBOLA4: Protein BOLA4%2C chloroplastic/mitochondrial (Arabidopsis thaliana)
AUR62001577	0	Has Orthologs	Cluster 13474			SimilarSDH6: Succinate dehydrogenase subunit 6%2C mitochondrial (Arabidopsis thaliana)
AUR62001578	0	Has Orthologs	Cluster 3857	Shoot Down		SimilarFLA17: Fasciclin-like arabinogalactan protein 17 (Arabidopsis thaliana)			30.1968	16.2391
AUR62001579	0	Has Orthologs	Cluster 5709			SimilarRHF2A: E3 ubiquitin-protein ligase RHF2A (Arabidopsis thaliana)
AUR62001580	0	Has Orthologs	Cluster 13475			Protein of unknown function
AUR62001581	0	Singleton	N/A			Protein of unknown function
AUR62001582	1	Has Orthologs	Cluster 3858			SimilarOEP61: Outer envelope protein 61 (Arabidopsis thaliana)
AUR62001583	0	Has Orthologs	Cluster 5710			SimilarEftud1: Elongation factor Tu GTP-binding domain-containing protein 1 (Mus musculus)
AUR62001584	0	Has Orthologs	Cluster 5711			SimilarPOK2: Phragmoplast orienting kinesin 2 (Arabidopsis thaliana)
AUR62001585	0	Has Orthologs	Cluster 5712			SimilarCnbp: Cellular nucleic acid-binding protein (Rattus norvegicus)
AUR62001586	0	Has Orthologs	Cluster 1672			SimilarUBP12: Ubiquitin carboxyl-terminal hydrolase 12 (Arabidopsis thaliana)
AUR62001587	0	Has Orthologs	Cluster 5713			SimilarTOUSLED: Serine/threonine-protein kinase TOUSLED (Arabidopsis thaliana)
AUR62001588	0	Has Orthologs	Cluster 5714			SimilarSMC3: Structural maintenance of chromosomes protein 3 (Pongo abelii)
AUR62001589	0	Has Orthologs	Cluster 1137	Shoot Down		SimilarBACOVA_02659: Beta-glucosidase BoGH3B (Bacteroides ovatus (strain ATCC 8483 / DSM 1896 / JCM 5824 / NCTC 11153))			13.5858	7.79018
AUR62001590	0	Has Orthologs	Cluster 2413			SimilarAAO4: Benzaldehyde dehydrogenase (NAD(+)) (Arabidopsis thaliana)
AUR62001591	0	Has Orthologs	Cluster 11317			SimilarTUBGCP6: Gamma-tubulin complex component 6 (Homo sapiens)
AUR62001592	1	Has Orthologs	Cluster 5715			SimilarHSP17.5-E: 17.5 kDa class I heat shock protein (Glycine max)
AUR62001593	1	Has Orthologs	Cluster 11608	Shoot Down		SimilarRTM2: Inactive protein RESTRICTED TEV MOVEMENT 2 (Arabidopsis thaliana)			15.1072	7.35431
AUR62001594	0	Has Orthologs	Cluster 5716			SimilarDRB3: Double-stranded RNA-binding protein 3 (Arabidopsis thaliana)
AUR62001595	0	Has Orthologs	Cluster 1868	Shoot Down		SimilarMETE: 5-methyltetrahydropteroyltriglutamate--homocysteine methyltransferase (Catharanthus roseus)			66.2429	22.2582
AUR62001596	1	Has Orthologs	Cluster 14544			SimilarCXP%3B2-3: Serine carboxypeptidase II-3 (Hordeum vulgare)
AUR62001597	0	Has Orthologs	Cluster 5717			SimilarAt1g30350: Probable pectate lyase 4 (Arabidopsis thaliana)
AUR62001598	0	Has Orthologs	Cluster 5718			SimilarCNX1: Molybdopterin biosynthesis protein CNX1 (Arabidopsis thaliana)
AUR62001599	0	Has Orthologs	Cluster 5719			SimilarBPM4: BTB/POZ and MATH domain-containing protein 4 (Arabidopsis thaliana)
AUR62001600	0	Has Orthologs	Cluster 5720	Shoot Up		SimilarZEP: Zeaxanthin epoxidase%2C chloroplastic (Arabidopsis thaliana)			104.246	149.517
AUR62001601	1	Has Orthologs	Cluster 5721			SimilarCBR1: NADH--cytochrome b5 reductase 1 (Arabidopsis thaliana)
AUR62001602	1	Has Orthologs	Cluster 5722			SimilarAPY6: Probable apyrase 6 (Arabidopsis thaliana)
AUR62001603	0	Has Orthologs	Cluster 2122			SimilarCHLP: Geranylgeranyl diphosphate reductase%2C chloroplastic (Nicotiana tabacum)
AUR62001604	0	Singleton	N/A			Protein of unknown function
AUR62001605	0	Has Orthologs	Cluster 1866			SimilarAt1g71250: GDSL esterase/lipase At1g71250 (Arabidopsis thaliana)
AUR62001606	0	Has Orthologs	Cluster 1866			SimilarAt5g21040: F-box/WD-40 repeat-containing protein At5g21040 (Arabidopsis thaliana)
AUR62001607	0	Has Orthologs	Cluster 13476			SimilarLTPG2: Non-specific lipid transfer protein GPI-anchored 2 (Arabidopsis thaliana)
AUR62001608	0	Has Orthologs	Cluster 5723			SimilarSDR1: (+)-neomenthol dehydrogenase (Arabidopsis thaliana)
AUR62001609	0	Has Orthologs	Cluster 5724			SimilarthrA: Bifunctional aspartokinase/homoserine dehydrogenase 1 (Escherichia coli (strain K12))
AUR62001610	0	Has Orthologs	Cluster 4211	Shoot Down	Quinoa Overrepresented	SimilarTATA-box-binding protein (Mesembryanthemum crystallinum)			14.3152	8.47782
AUR62001611	0	Has Orthologs	Cluster 5725			SimilarFRS3: Protein FAR1-RELATED SEQUENCE 3 (Arabidopsis thaliana)
AUR62001612	0	Has Orthologs	Cluster 3936			SimilarSE: Serrate RNA effector molecule (Arabidopsis thaliana)
AUR62001613	0	Has Orthologs	Cluster 4212			SimilarRPL30: 60S ribosomal protein L30 (Lupinus luteus)
AUR62001614	6	Has Orthologs	Cluster 13478			Protein of unknown function
AUR62001615	0	Has Orthologs	Cluster 13477			SimilarNsmce1: Non-structural maintenance of chromosomes element 1 homolog (Rattus norvegicus)
AUR62001616	0	Has Orthologs	Cluster 11162			SimilarNRPB10L: DNA-directed RNA polymerase subunit 10-like protein (Arabidopsis thaliana)
AUR62001617	1	Has Orthologs	Cluster 11609			Protein of unknown function
AUR62001618	0	Has Orthologs	Cluster 1595		Quinoa Overrepresented	SimilarCHC1: Clathrin heavy chain 1 (Arabidopsis thaliana)
AUR62001619	0	Has Orthologs	Cluster 5090			SimilarYDA: Mitogen-activated protein kinase kinase kinase YODA (Arabidopsis thaliana)
AUR62001620	0	Has Orthologs	Cluster 5726			SimilarAt2g30020: Probable protein phosphatase 2C 25 (Arabidopsis thaliana)
AUR62001621	0	Has Orthologs	Cluster 15215			SimilarMORF8: Multiple organellar RNA editing factor 8%2C chloroplastic/mitochondrial (Arabidopsis thaliana)
AUR62001622	13	Has Orthologs	Cluster 1031		Quinoa Overrepresented	SimilarPOT7: Potassium transporter 7 (Arabidopsis thaliana)
AUR62001623	1	Has Orthologs	Cluster 11610			SimilarPMR5: Protein PMR5 (Arabidopsis thaliana)
AUR62001624	0	Has Orthologs	Cluster 3325			SimilarIDM1: Increased DNA methylation 1 (Arabidopsis thaliana)
AUR62001625	0	Has Orthologs	Cluster 14545			SimilarCOX2: Cytochrome c oxidase subunit 2 (Ustilago maydis (strain 521 / FGSC 9021))
AUR62001626	2	Has Orthologs	Cluster 14546			SimilarCOX2: Cytochrome c oxidase subunit 2 (Beta vulgaris)
AUR62001627	0	Has Orthologs	Cluster 5727			SimilarGA2OX8: Gibberellin 2-beta-dioxygenase 8 (Arabidopsis thaliana)
AUR62001628	0	Has Orthologs	Cluster 2680			SimilarAt1g07170: PHD finger-like domain-containing protein 5B (Arabidopsis thaliana)
AUR62001629	0	Has Orthologs	Cluster 2015			SimilarNDA1: Internal alternative NAD(P)H-ubiquinone oxidoreductase A1%2C mitochondrial (Solanum tuberosum)
AUR62001630	0	Has Orthologs	Cluster 5728	Root Down		SimilarPUB43: U-box domain-containing protein 43 (Arabidopsis thaliana)	10.6903	5.59321
AUR62001631	0	Has Orthologs	Cluster 4213			SimilarAt2g18220: Nucleolar complex protein 2 homolog (Arabidopsis thaliana)
AUR62001632	0	Singleton	N/A			Protein of unknown function
AUR62001633	0	Has Orthologs	Cluster 3935			SimilarAt5g58620: Zinc finger CCCH domain-containing protein 66 (Arabidopsis thaliana)
AUR62001634	0	Has Orthologs	Cluster 1147	Shoot Down		SimilarPLC4: Phosphoinositide phospholipase C 4 (Arabidopsis thaliana)			4.8971	0.734562
AUR62001635	0	Has Orthologs	Cluster 1147			SimilarPLCD3: 1-phosphatidylinositol 4%2C5-bisphosphate phosphodiesterase delta-3 (Homo sapiens)
AUR62001636	0	Has Orthologs	Cluster 1147			SimilarPLC1: Phosphoinositide phospholipase C 1 (Arabidopsis thaliana)
AUR62001637	1	Has Orthologs	Cluster 1854			SimilarCCR3: Putative serine/threonine-protein kinase-like protein CCR3 (Arabidopsis thaliana)
AUR62001638	0	Has Orthologs	Cluster 5729			SimilarrpsR: 30S ribosomal protein S18 (Thermus thermophilus (strain HB8 / ATCC 27634 / DSM 579))
AUR62001639	0	Has Orthologs	Cluster 1147			SimilarPLCG1: 1-phosphatidylinositol 4%2C5-bisphosphate phosphodiesterase gamma-1 (Bos taurus)
AUR62001640	0	Has Orthologs	Cluster 5730	Shoot Up		SimilarPDX1: Probable pyridoxal 5'-phosphate synthase subunit PDX1 (Hevea brasiliensis)			141.204	208.831
AUR62001641	2	Has Orthologs	Cluster 5731			SimilarCPIJ013394: O-glucosyltransferase rumi homolog (Culex quinquefasciatus)
AUR62001642	2	Has Orthologs	Cluster 5732			Protein of unknown function
AUR62001643	0	Has Orthologs	Cluster 13479			SimilarAt5g18475: Pentatricopeptide repeat-containing protein At5g18475 (Arabidopsis thaliana)
AUR62001644	0	Has Orthologs	Cluster 5733	Shoot Down		SimilarCYP19-4: Peptidyl-prolyl cis-trans isomerase CYP19-4 (Arabidopsis thaliana)			133.569	94.6627
AUR62001645	0	Has Orthologs	Cluster 5734			SimilarPIPC: SMR domain-containing protein At5g58720 (Arabidopsis thaliana)
AUR62001646	0	Has Orthologs	Cluster 5735			SimilarAt5g58730: Inositol 3-kinase (Arabidopsis thaliana)
AUR62001647	0	Has Orthologs	Cluster 5736			SimilarNudcd2: NudC domain-containing protein 2 (Mus musculus)
AUR62001648	11	Has Orthologs	Cluster 11328	Shoot Up		SimilarCAX1: Vacuolar cation/proton exchanger 1 (Arabidopsis thaliana)			8.80851	13.5985
AUR62001649	0	Has Orthologs	Cluster 5737			SimilarVEP1: 3-oxo-Delta(4%2C5)-steroid 5-beta-reductase (Arabidopsis thaliana)
AUR62001650	5	Singleton	N/A			SimilarABCG31: ABC transporter G family member 31 (Arabidopsis thaliana)
AUR62001651	3	Has Orthologs	Cluster 1023			SimilarABCG31: ABC transporter G family member 31 (Arabidopsis thaliana)
AUR62001652	0	Has Orthologs	Cluster 5738			SimilarDDB2: Protein DAMAGED DNA-BINDING 2 (Arabidopsis thaliana)
AUR62001653	0	Has Orthologs	Cluster 13480	Shoot Up		SimilarAt5g58770: Dehydrodolichyl diphosphate synthase 2 (Arabidopsis thaliana)			6.42631	18.0272
AUR62001654	1	Has Orthologs	Cluster 5739			SimilarRNF141: RING finger protein 141 (Gallus gallus)
AUR62001655	0	Has Orthologs	Cluster 5740			SimilarCDR1: Aspartic proteinase CDR1 (Arabidopsis thaliana)
AUR62001656	0	Has Orthologs	Cluster 1344			SimilarVLN1: Villin-1 (Arabidopsis thaliana)
AUR62001657	0	Has Orthologs	Cluster 1165		Quinoa Overrepresented	SimilarNPC1: Non-specific phospholipase C1 (Arabidopsis thaliana)
AUR62001658	7	Has Orthologs	Cluster 1194	Shoot Down		SimilarAMT1-3: Ammonium transporter 1 member 3 (Solanum lycopersicum)			18.3456	10.4777
AUR62001659	0	Has Orthologs	Cluster 13481			SimilarAt3g47120: Zinc finger CCCH domain-containing protein 42 (Arabidopsis thaliana)
AUR62001660	0	Singleton	N/A			SimilarPCMP-H33: Pentatricopeptide repeat-containing protein At2g29760%2C chloroplastic (Arabidopsis thaliana)
AUR62001661	0	Singleton	N/A			SimilarPCMP-A2: Pentatricopeptide repeat-containing protein At4g18520 (Arabidopsis thaliana)
AUR62001662	11	Has Orthologs	Cluster 1248			SimilarNPF5.10: Protein NRT1/ PTR FAMILY 5.10 (Arabidopsis thaliana)
AUR62001663	0	Has Orthologs	Cluster 5741			SimilarPH1: Pleckstrin homology domain-containing protein 1 (Arabidopsis thaliana)
AUR62001664	0	Has Orthologs	Cluster 11611			SimilarAAMP: Angio-associated migratory cell protein (Canis lupus familiaris)
AUR62001665	0	Has Orthologs	Cluster 5742			SimilarAt5g58800: Probable NAD(P)H dehydrogenase (quinone) FQR1-like 3 (Arabidopsis thaliana)
AUR62001666	0	Has Orthologs	Cluster 1870			Protein of unknown function
AUR62001667	0	Has Orthologs	Cluster 4214		Quinoa Overrepresented	Similargtf2e2: General transcription factor IIE subunit 2 (Dictyostelium discoideum)
AUR62001668	0	Singleton	N/A	Shoot Down		Protein of unknown function			997.69	709.567
AUR62001669	0	Has Orthologs	Cluster 1870			SimilarASA2: Anthranilate synthase alpha subunit 2%2C chloroplastic (Arabidopsis thaliana)
AUR62001670	0	Has Orthologs	Cluster 14547			SimilarRPP0A: 60S acidic ribosomal protein P0-1 (Arabidopsis thaliana)
AUR62001671	0	Has Orthologs	Cluster 11612			SimilarCDC6B: Cell division control protein 6 homolog B (Arabidopsis thaliana)
AUR62001672	0	Has Orthologs	Cluster 3958			Protein of unknown function
AUR62001673	9	Has Orthologs	Cluster 5743			SimilarGONST2: GDP-mannose transporter GONST2 (Arabidopsis thaliana)
AUR62001674	0	Has Orthologs	Cluster 5744	Shoot Down		Protein of unknown function			18.1952	10.7934
AUR62001675	10	Has Orthologs	Cluster 1974	Shoot Up		SimilarANTR1: Sodium-dependent phosphate transport protein 1%2C chloroplastic (Arabidopsis thaliana)			47.9898	74.9228
AUR62001676	1	Has Orthologs	Cluster 1352	Shoot Down		SimilarCYP86A1: Cytochrome P450 86A1 (Arabidopsis thaliana)			6.16176	0.832833
AUR62001677	0	Has Orthologs	Cluster 5745			SimilarTIF3F1: Eukaryotic translation initiation factor 3 subunit F (Arabidopsis thaliana)
AUR62001678	0	Has Orthologs	Cluster 5746	Shoot Up		Protein of unknown function			770.588	1210.05
AUR62001679	0	Has Orthologs	Cluster 5747			SimilarAt2g29640: Josephin-like protein (Arabidopsis thaliana)
AUR62001680	0	Has Orthologs	Cluster 1022		Quinoa Overrepresented	SimilarGSTT3: Glutathione S-transferase T3 (Arabidopsis thaliana)
AUR62001681	0	Has Orthologs	Cluster 2909			Protein of unknown function
AUR62001682	0	Has Orthologs	Cluster 5748			SimilarRPL4: 50S ribosomal protein L4%2C chloroplastic (Spinacia oleracea)
AUR62001683	0	Has Orthologs	Cluster 3940	Shoot Up		SimilarTHIC: Phosphomethylpyrimidine synthase%2C chloroplastic (Arabidopsis thaliana)			225.46	345.293
AUR62001684	0	Has Orthologs	Cluster 5749	Shoot Up		SimilarFTSH7: ATP-dependent zinc metalloprotease FTSH 7%2C chloroplastic (Arabidopsis thaliana)			6.82642	10.5719
AUR62001685	0	Has Orthologs	Cluster 11613	Shoot Up		SimilarFSD3: Superoxide dismutase [Fe] 3%2C chloroplastic (Arabidopsis thaliana)			13.4729	21.3105
AUR62001686	0	Has Orthologs	Cluster 11614			Protein of unknown function
AUR62001687	0	Has Orthologs	Cluster 1137			SimilarBACOVA_02659: Beta-glucosidase BoGH3B (Bacteroides ovatus (strain ATCC 8483 / DSM 1896 / JCM 5824 / NCTC 11153))
AUR62001688	0	Has Orthologs	Cluster 5750			SimilarDIVARICATA: Transcription factor DIVARICATA (Antirrhinum majus)
AUR62001689	0	Has Orthologs	Cluster 1018	Shoot Down	Quinoa Overrepresented (with Beet)	SimilarIRX12: Laccase-4 (Arabidopsis thaliana)			14.503	6.71921
AUR62001690	0	Has Orthologs	Cluster 5751			Protein of unknown function
AUR62001691	0	Has Orthologs	Cluster 5752			SimilarARID2: AT-rich interactive domain-containing protein 2 (Arabidopsis thaliana)
AUR62001692	0	Has Orthologs	Cluster 3919			Protein of unknown function
AUR62001693	0	Has Orthologs	Cluster 5753			Protein of unknown function
AUR62001694	0	Has Orthologs	Cluster 2781			Protein of unknown function
AUR62001695	0	Singleton	N/A			Protein of unknown function
AUR62001696	0	Singleton	N/A			Protein of unknown function
AUR62001697	0	Has Orthologs	Cluster 5754			SimilarACOT13: Acyl-coenzyme A thioesterase 13 (Pongo abelii)
AUR62001698	11	Has Orthologs	Cluster 2515			SimilarANTR4: Probable anion transporter 4%2C chloroplastic (Arabidopsis thaliana)
AUR62001699	0	Has Orthologs	Cluster 1524	Shoot Up		SimilarAlpha-glucan phosphorylase%2C H isozyme (Solanum tuberosum)			47.8835	77.4624
AUR62001700	0	Has Orthologs	Cluster 14548	Root Up; Shoot Up		SimilarSR45A: Serine/arginine-rich splicing factor SR45a (Arabidopsis thaliana)	28.1402	52.3158	9.18383	18.0626
AUR62001701	0	Has Orthologs	Cluster 2266	Shoot Up	Quinoa Overrepresented	SimilarProbable glutathione S-transferase (Nicotiana tabacum)			6.9157	49.1239
AUR62001702	0	Has Orthologs	Cluster 13482			Similarrio2: Serine/threonine-protein kinase rio2 (Dictyostelium discoideum)
AUR62001703	0	Has Orthologs	Cluster 4215			SimilarSKI2: DExH-box ATP-dependent RNA helicase DExH11 (Arabidopsis thaliana)
AUR62001704	0	Has Orthologs	Cluster 5755			Protein of unknown function
AUR62001705	0	Has Orthologs	Cluster 5084			SimilarIRKI: IRK-interacting protein (Arabidopsis thaliana)
AUR62001706	3	Has Orthologs	Cluster 13483			SimilarPUMP2: Mitochondrial uncoupling protein 2 (Arabidopsis thaliana)
AUR62001707	0	Has Orthologs	Cluster 3920			SimilarPCNA: Proliferating cell nuclear antigen (Nicotiana tabacum)
AUR62001708	10	Has Orthologs	Cluster 1848			SimilarAt3g11320: Probable sugar phosphate/phosphate translocator At3g11320 (Arabidopsis thaliana)
AUR62001709	0	Has Orthologs	Cluster 5756			SimilarENO3: Cytosolic enolase 3 (Arabidopsis thaliana)
AUR62001710	1	Has Orthologs	Cluster 5757			SimilarAt2g38010: Neutral ceramidase (Arabidopsis thaliana)
AUR62001711	0	Has Orthologs	Cluster 5758			Protein of unknown function
AUR62001712	0	Has Orthologs	Cluster 1096			SimilarTUBB3: Tubulin beta-3 chain (Arabidopsis thaliana)
AUR62001713	0	Has Orthologs	Cluster 1022		Quinoa Overrepresented	SimilarGSTT3: Glutathione S-transferase T3 (Arabidopsis thaliana)
AUR62001714	0	Singleton	N/A			SimilarNMD3: 60S ribosomal export protein NMD3 (Saccharomyces cerevisiae (strain ATCC 204508 / S288c))
AUR62001715	0	Has Orthologs	Cluster 13484			Protein of unknown function
AUR62001716	0	Has Orthologs	Cluster 13485			Similarpolr1d: DNA-directed RNA polymerases I and III subunit RPAC2 (Xenopus laevis)
AUR62001717	0	Singleton	N/A			SimilarTIM10: Mitochondrial import inner membrane translocase subunit TIM10 (Arabidopsis thaliana)
AUR62001718	0	Has Orthologs	Cluster 1114	Shoot Down		SimilarAt5g41260: Probable serine/threonine-protein kinase At5g41260 (Arabidopsis thaliana)			19.1387	8.98039
AUR62001719	0	Has Orthologs	Cluster 5759			Protein of unknown function
AUR62001720	3	Has Orthologs	Cluster 5760	Shoot Up		SimilarCOPT6: Copper transporter 6 (Arabidopsis thaliana)			49.2804	73.8971
AUR62001721	0	Has Orthologs	Cluster 11615			SimilarAt3g01520: Universal stress protein A-like protein (Arabidopsis thaliana)
AUR62001722	4	Has Orthologs	Cluster 11616			Protein of unknown function
AUR62001723	0	Has Orthologs	Cluster 5761	Root Down		Protein of unknown function	45.5504	23.3976
AUR62001724	0	Has Orthologs	Cluster 1006		Quinoa Overrepresented	SimilarSBT4.4: Subtilisin-like protease SBT4.4 (Arabidopsis thaliana)
AUR62001725	0	Has Orthologs	Cluster 1191			SimilarNPP2: Serine/threonine-protein phosphatase PP1 isozyme 2 (Nicotiana tabacum)
AUR62001726	0	Has Orthologs	Cluster 5762			SimilarCRR2: Pentatricopeptide repeat-containing protein At3g46790%2C chloroplastic (Arabidopsis thaliana)
AUR62001727	0	Has Orthologs	Cluster 5763			Protein of unknown function
AUR62001728	0	Has Orthologs	Cluster 4216			Similareif3g: Eukaryotic translation initiation factor 3 subunit G (Xenopus tropicalis)
AUR62001729	3	Singleton	N/A	Shoot Up		SimilarSMO2-2: Methylsterol monooxygenase 2-2 (Arabidopsis thaliana)			35.7966	51.1972
AUR62001730	0	Has Orthologs	Cluster 5764			SimilarPUR2: Phosphoribosylamine--glycine ligase%2C chloroplastic (Arabidopsis thaliana)
AUR62001731	0	Has Orthologs	Cluster 5765	Shoot Up		SimilarAIP1: Protein phosphatase 2C 3 (Arabidopsis thaliana)			2.04474	4.98914
AUR62001732	0	Has Orthologs	Cluster 1100		Quinoa Overrepresented	Protein of unknown function
AUR62001733	0	Has Orthologs	Cluster 13486			SimilarSDR: Tropinone reductase homolog At2g29360 (Arabidopsis thaliana)
AUR62001734	0	Singleton	N/A			Protein of unknown function
AUR62001735	0	Quinoa Specific	Cluster 1237		Quinoa Overrepresented	Protein of unknown function
AUR62001736	0	Has Orthologs	Cluster 5766			SimilarSRRM1: Serine/arginine repetitive matrix protein 1 (Gallus gallus)
AUR62001737	0	Has Orthologs	Cluster 1679			Similartoa1: Transcription initiation factor IIA large subunit (Schizosaccharomyces pombe (strain 972 / ATCC 24843))
AUR62001738	11	Has Orthologs	Cluster 1679	Shoot Up		SimilarAt5g59250: D-xylose-proton symporter-like 3%2C chloroplastic (Arabidopsis thaliana)			10.058	18.4036
AUR62001739	0	Singleton	N/A			SimilarDDB_G0284661: Probable myosin light chain kinase DDB_G0284661 (Dictyostelium discoideum)
AUR62001740	2	Has Orthologs	Cluster 1059		Quinoa Overrepresented	SimilarAt1g53080: Lectin-like protein At1g53080 (Arabidopsis thaliana)
AUR62001741	1	Has Orthologs	Cluster 1059		Quinoa Overrepresented	SimilarLECRK59: L-type lectin-domain containing receptor kinase V.9 (Arabidopsis thaliana)
AUR62001742	3	Has Orthologs	Cluster 1059		Quinoa Overrepresented	SimilarLECRK42: L-type lectin-domain containing receptor kinase IV.2 (Arabidopsis thaliana)
AUR62001743	2	Has Orthologs	Cluster 1059		Quinoa Overrepresented	SimilarLECRK42: L-type lectin-domain containing receptor kinase IV.2 (Arabidopsis thaliana)
AUR62001744	1	Has Orthologs	Cluster 1059		Quinoa Overrepresented	SimilarLECRK59: L-type lectin-domain containing receptor kinase V.9 (Arabidopsis thaliana)
AUR62001745	0	Has Orthologs	Cluster 11617			Protein of unknown function
AUR62001746	0	Has Orthologs	Cluster 3883			SimilarTOC75-3: Protein TOC75-3%2C chloroplastic (Arabidopsis thaliana)
AUR62001747	0	Has Orthologs	Cluster 5767			Protein of unknown function
AUR62001748	0	Has Orthologs	Cluster 5768			SimilarPCMP-E1: Pentatricopeptide repeat-containing protein At5g59600 (Arabidopsis thaliana)
AUR62001749	1	Has Orthologs	Cluster 5769			Protein of unknown function
AUR62001750	0	Has Orthologs	Cluster 1847			SimilarAPUM1: Pumilio homolog 1 (Arabidopsis thaliana)
AUR62001751	2	Has Orthologs	Cluster 13487			SimilarSDIR1: E3 ubiquitin-protein ligase SDIR1 (Arabidopsis thaliana)
AUR62001752	9	Has Orthologs	Cluster 5770			SimilarZIP1: Zinc transporter 1 (Oryza sativa subsp. japonica)
AUR62001753	3	Has Orthologs	Cluster 2908		Quinoa Overrepresented	SimilarALMT2: Aluminum-activated malate transporter 2 (Arabidopsis thaliana)
AUR62001754	0	Has Orthologs	Cluster 1018	Root Up	Quinoa Overrepresented (with Beet)	SimilarLAC17: Laccase-17 (Arabidopsis thaliana)	36.8645	67.3571
AUR62001755	0	Singleton	N/A			Protein of unknown function
AUR62001756	0	Has Orthologs	Cluster 1869			SimilarCYP707A2: Abscisic acid 8'-hydroxylase 2 (Arabidopsis thaliana)
AUR62001757	7	Has Orthologs	Cluster 5771			Protein of unknown function
AUR62001758	0	Has Orthologs	Cluster 3952			SimilarFTSH10: ATP-dependent zinc metalloprotease FTSH 10%2C mitochondrial (Arabidopsis thaliana)
AUR62001759	0	Has Orthologs	Cluster 5772			SimilarSPAC24B11.05: Uncharacterized protein C24B11.05 (Schizosaccharomyces pombe (strain 972 / ATCC 24843))
AUR62001760	0	Has Orthologs	Cluster 5773			SimilarUfd1l: Ubiquitin fusion degradation protein 1 homolog (Rattus norvegicus)
AUR62001761	0	Has Orthologs	Cluster 5774			Protein of unknown function
AUR62001762	0	Has Orthologs	Cluster 1244			SimilarSS: Sucrose synthase (Glycine max)
AUR62001763	0	Has Orthologs	Cluster 5775			SimilarRGL2: DELLA protein RGL2 (Arabidopsis thaliana)
AUR62001764	0	Has Orthologs	Cluster 1278		Quinoa Overrepresented (with Beet)	SimilarSCL5: Scarecrow-like protein 5 (Arabidopsis thaliana)
AUR62001765	0	Has Orthologs	Cluster 1278		Quinoa Overrepresented (with Beet)	SimilarCIGR1: Chitin-inducible gibberellin-responsive protein 1 (Oryza sativa subsp. japonica)
AUR62001766	0	Has Orthologs	Cluster 1278		Quinoa Overrepresented (with Beet)	SimilarSHR2: Protein SHORT-ROOT 2 (Oryza sativa subsp. indica)
AUR62001767	7	Has Orthologs	Cluster 1023			SimilarABCG31: ABC transporter G family member 31 (Arabidopsis thaliana)
AUR62001768	0	Has Orthologs	Cluster 1264			SimilarSCL14: Scarecrow-like protein 14 (Arabidopsis thaliana)
AUR62001769	0	Has Orthologs	Cluster 4002			SimilarTRP3: Telomere repeat-binding protein 3 (Arabidopsis thaliana)
AUR62001770	0	Has Orthologs	Cluster 1861			SimilarORP3C: Oxysterol-binding protein-related protein 3C (Arabidopsis thaliana)
AUR62001771	2	Has Orthologs	Cluster 5776			SimilarUncharacterized protein C20orf24 homolog (Mus musculus)
AUR62001772	2	Has Orthologs	Cluster 5777			Protein of unknown function
AUR62001773	0	Has Orthologs	Cluster 1558		Quinoa Overrepresented	SimilarKAM1: Xyloglucan galactosyltransferase KATAMARI1 (Arabidopsis thaliana)
AUR62001774	6	Has Orthologs	Cluster 4217		Quinoa Overrepresented (with Beet)	SimilarRBL1: RHOMBOID-like protein 1 (Arabidopsis thaliana)
AUR62001775	0	Has Orthologs	Cluster 3783			SimilarB2 protein (Daucus carota)
AUR62001776	0	Has Orthologs	Cluster 11618	Shoot Down		SimilarEXPA4: Expansin-A4 (Arabidopsis thaliana)			95.5452	52.6942
AUR62001777	0	Has Orthologs	Cluster 5778			SimilarFDM4: Factor of DNA methylation 4 (Arabidopsis thaliana)
AUR62001778	0	Has Orthologs	Cluster 14549			SimilarAt5g47070: Probable receptor-like protein kinase At5g47070 (Arabidopsis thaliana)
AUR62001779	0	Has Orthologs	Cluster 1682		Quinoa Overrepresented	SimilarAPK1B: Protein kinase APK1B%2C chloroplastic (Arabidopsis thaliana)
AUR62001780	0	Has Orthologs	Cluster 14550			SimilarCTIMC: Triosephosphate isomerase%2C cytosolic (Arabidopsis thaliana)
AUR62001781	0	Singleton	N/A			Protein of unknown function
AUR62001782	0	Has Orthologs	Cluster 5779			SimilarMBD6: Methyl-CpG-binding domain-containing protein 6 (Arabidopsis thaliana)
AUR62001783	0	Has Orthologs	Cluster 4218		Quinoa Overrepresented	SimilarFOLD1: Bifunctional protein FolD 1%2C mitochondrial (Arabidopsis thaliana)
AUR62001784	1	Has Orthologs	Cluster 5780	Shoot Down		SimilarGLC1: Glucan endo-1%2C3-beta-glucosidase (Triticum aestivum)			20.1931	11.3065
AUR62001785	0	Has Orthologs	Cluster 5781	Root Down		SimilarAt1g07590: Pentatricopeptide repeat-containing protein At1g07590%2C mitochondrial (Arabidopsis thaliana)	7.34865	2.9651
AUR62001786	0	Singleton	N/A			SimilarFOLD4: Bifunctional protein FolD 4%2C chloroplastic (Arabidopsis thaliana)
AUR62001787	0	Has Orthologs	Cluster 1185		Quinoa Overrepresented	Protein of unknown function
AUR62001788	0	Has Orthologs	Cluster 4219			SimilarOBGM: Probable GTP-binding protein OBGM%2C mitochondrial (Oryza sativa subsp. japonica)
AUR62001789	0	Has Orthologs	Cluster 5782			SimilarTRM32: Protein TRM32 (Arabidopsis thaliana)
AUR62001790	0	Has Orthologs	Cluster 11619			SimilarSSL10: Protein STRICTOSIDINE SYNTHASE-LIKE 10 (Arabidopsis thaliana)
AUR62001791	0	Has Orthologs	Cluster 4220			SimilarFLA4: Fasciclin-like arabinogalactan protein 4 (Arabidopsis thaliana)
AUR62001792	0	Has Orthologs	Cluster 2106			SimilarPLL5: Probable protein phosphatase 2C 4 (Arabidopsis thaliana)
AUR62001793	0	Has Orthologs	Cluster 5783			SimilarEpn2: Epsin-2 (Mus musculus)
AUR62001794	0	Has Orthologs	Cluster 5784			SimilarPUB33: U-box domain-containing protein 33 (Arabidopsis thaliana)
AUR62001795	0	Has Orthologs	Cluster 1132			SimilarActin (Gossypium hirsutum)
AUR62001796	0	Has Orthologs	Cluster 5785			Protein of unknown function
AUR62001797	0	Singleton	N/A			Protein of unknown function
AUR62001798	0	Has Orthologs	Cluster 5786	Shoot Down		SimilarY-3: Uncharacterized protein At3g17950 (Arabidopsis thaliana)			21.3292	9.2594
AUR62001799	0	Has Orthologs	Cluster 5787			SimilarXBAT31: Putative E3 ubiquitin-protein ligase XBAT31 (Arabidopsis thaliana)
AUR62001800	0	Has Orthologs	Cluster 1613			SimilarCBF5: H/ACA ribonucleoprotein complex subunit 4 (Arabidopsis thaliana)
AUR62001801	0	Singleton	N/A			SimilarHSP17.5-E: 17.5 kDa class I heat shock protein (Glycine max)
AUR62001802	0	Quinoa Specific	Cluster 16249		Quinoa Overrepresented	Protein of unknown function
AUR62001803	0	Has Orthologs	Cluster 14551		Quinoa Overrepresented	SimilarXTH28: Probable xyloglucan endotransglucosylase/hydrolase protein 28 (Arabidopsis thaliana)
AUR62001804	0	Has Orthologs	Cluster 3884	Shoot Down		SimilarHSP17.6C: 17.6 kDa class I heat shock protein 3 (Arabidopsis thaliana)			18.304	3.11655
AUR62001805	5	Singleton	N/A			SimilarZdhhc17: Palmitoyltransferase ZDHHC17 (Rattus norvegicus)
AUR62001806	0	Has Orthologs	Cluster 1736			SimilarPUB13: U-box domain-containing protein 13 (Arabidopsis thaliana)
AUR62001807	0	Singleton	N/A			SimilarDOF3.6: Dof zinc finger protein DOF3.6 (Arabidopsis thaliana)
AUR62001808	0	Has Orthologs	Cluster 3885			Protein of unknown function
AUR62001809	0	Has Orthologs	Cluster 2034	Shoot Down		SimilarWOX2: WUSCHEL-related homeobox 2 (Arabidopsis thaliana)			5.08215	2.49388
AUR62001810	4	Has Orthologs	Cluster 5788			SimilarPPF-1: Inner membrane protein PPF-1%2C chloroplastic (Pisum sativum)
AUR62001811	0	Has Orthologs	Cluster 11329	Shoot Down		SimilarOsmotin-like protein (Solanum lycopersicum)			72.9347	41.5296
AUR62001812	0	Has Orthologs	Cluster 1280		Quinoa Overrepresented	Protein of unknown function
AUR62001813	0	Singleton	N/A			Protein of unknown function
AUR62001814	0	Has Orthologs	Cluster 17251			SimilarUBC7: Ubiquitin-conjugating enzyme E2 7 (Arabidopsis thaliana)
AUR62001815	0	Has Orthologs	Cluster 5789			SimilarJasmonate-induced protein homolog (Atriplex canescens)
AUR62001816	0	Has Orthologs	Cluster 11620			SimilaryraH: Uncharacterized protein YraH (Bacillus subtilis (strain 168))
AUR62001817	1	Has Orthologs	Cluster 5790			Similarsec14: Sec14 cytosolic factor (Schizosaccharomyces pombe (strain 972 / ATCC 24843))
AUR62001818	10	Has Orthologs	Cluster 5791	Root Down		Protein of unknown function	157.312	55.4604
AUR62001819	0	Has Orthologs	Cluster 3981	Shoot Down		SimilarUXS6: UDP-glucuronic acid decarboxylase 6 (Arabidopsis thaliana)			111.169	30.0902
AUR62001820	0	Has Orthologs	Cluster 1093			SimilarHistone H4 (Glycine max)
AUR62001821	0	Singleton	N/A			SimilarACR9: ACT domain-containing protein ACR9 (Arabidopsis thaliana)
AUR62001822	0	Has Orthologs	Cluster 5792			Protein of unknown function
AUR62001823	0	Singleton	N/A			Protein of unknown function
AUR62001824	0	Has Orthologs	Cluster 5793			Similarviaf: Viral IAP-associated factor homolog (Drosophila melanogaster)
AUR62001825	0	Has Orthologs	Cluster 1373			SimilarProbable histone H2B.1 (Medicago truncatula)
AUR62001826	0	Singleton	N/A			SimilarADF2: Actin-depolymerizing factor 2 (Petunia hybrida)
AUR62001827	0	Has Orthologs	Cluster 4221			SimilarRBG4: Glycine-rich RNA-binding protein 4%2C mitochondrial (Arabidopsis thaliana)
AUR62001828	0	Has Orthologs	Cluster 5794			SimilarOs05g0113900: Probable histone H2A.6 (Oryza sativa subsp. japonica)
AUR62001829	0	Singleton	N/A			SimilarHIST2H2BC: Putative histone H2B type 2-C (Homo sapiens)
AUR62001830	0	Has Orthologs	Cluster 1373			SimilarHistone H2B.2 (Triticum aestivum)
AUR62001831	0	Has Orthologs	Cluster 14552		Quinoa Overrepresented	SimilarRPS15AA: 40S ribosomal protein S15a-1 (Arabidopsis thaliana)
AUR62001832	0	Singleton	N/A			SimilarRAB1BV: Ras-related protein RAB1BV (Beta vulgaris)
AUR62001833	0	Has Orthologs	Cluster 1231		Quinoa Overrepresented	SimilarPCMP-H61: Pentatricopeptide repeat-containing protein At5g66520 (Arabidopsis thaliana)
AUR62001834	0	Has Orthologs	Cluster 3968			SimilarZAT12: Zinc finger protein ZAT12 (Arabidopsis thaliana)
AUR62001835	0	Has Orthologs	Cluster 5795			SimilarMBD7: Methyl-CpG-binding domain-containing protein 7 (Arabidopsis thaliana)
AUR62001836	0	Has Orthologs	Cluster 3219			SimilarHarbi1: Putative nuclease HARBI1 (Rattus norvegicus)
AUR62001837	0	Has Orthologs	Cluster 3218			SimilarUFC: Protein UPSTREAM OF FLC (Arabidopsis thaliana)
AUR62001838	0	Has Orthologs	Cluster 3217	Root Up		SimilarMYB59: Transcription factor MYB59 (Arabidopsis thaliana)	22.772	52.1086
AUR62001839	1	Has Orthologs	Cluster 11318			SimilarHACD2: Very-long-chain (3R)-3-hydroxyacyl-CoA dehydratase 2 (Bos taurus)
AUR62001840	6	Has Orthologs	Cluster 5796			SimilarTIP1-3: Aquaporin TIP1-3 (Arabidopsis thaliana)
AUR62001841	0	Has Orthologs	Cluster 5797			Protein of unknown function
AUR62001842	0	Singleton	N/A			Protein of unknown function
AUR62001843	0	Has Orthologs	Cluster 1177			SimilarRIBA3: Monofunctional riboflavin biosynthesis protein RIBA 3%2C chloroplastic (Arabidopsis thaliana)
AUR62001844	0	Has Orthologs	Cluster 11182			SimilarAt1g07740: Pentatricopeptide repeat-containing protein At1g07740%2C mitochondrial (Arabidopsis thaliana)
AUR62001845	0	Has Orthologs	Cluster 5798	Root Up		SimilarDIR25: Dirigent protein 25 (Arabidopsis thaliana)	30.9167	112.22
AUR62001846	0	Has Orthologs	Cluster 5799			Protein of unknown function
AUR62001847	8	Has Orthologs	Cluster 1424			SimilarECA4: Calcium-transporting ATPase 4%2C endoplasmic reticulum-type (Arabidopsis thaliana)
AUR62001848	0	Has Orthologs	Cluster 5800			Protein of unknown function
AUR62001849	0	Has Orthologs	Cluster 5801			Protein of unknown function
AUR62001850	0	Has Orthologs	Cluster 13488			SimilarAt5g58770: Dehydrodolichyl diphosphate synthase 2 (Arabidopsis thaliana)
AUR62001851	0	Has Orthologs	Cluster 2104			SimilarKCS12: 3-ketoacyl-CoA synthase 12 (Arabidopsis thaliana)
AUR62001852	0	Has Orthologs	Cluster 5802			SimilarNUDT9: Nudix hydrolase 9 (Arabidopsis thaliana)
AUR62001853	4	Has Orthologs	Cluster 5803			SimilarAt5g02620: Ankyrin repeat-containing protein At5g02620 (Arabidopsis thaliana)
AUR62001854	0	Has Orthologs	Cluster 5804			SimilarAt3g46220: E3 UFM1-protein ligase 1 homolog (Arabidopsis thaliana)
AUR62001855	0	Has Orthologs	Cluster 5805			SimilarRPP30: Ribonuclease P protein subunit p30 (Bos taurus)
AUR62001856	0	Has Orthologs	Cluster 11621			Protein of unknown function
AUR62001857	0	Has Orthologs	Cluster 4222		Quinoa Overrepresented	SimilarChitinase 2 (Tulipa bakeri)
AUR62001858	0	Has Orthologs	Cluster 1345		Quinoa Overrepresented	SimilarTKRP125: 125 kDa kinesin-related protein (Nicotiana tabacum)
AUR62001859	0	Has Orthologs	Cluster 5806			SimilarNfrkb: Nuclear factor related to kappa-B-binding protein (Mus musculus)
AUR62001860	0	Quinoa Specific	Cluster 11622		Quinoa Overrepresented	Protein of unknown function
AUR62001861	4	Has Orthologs	Cluster 1203			SimilarRBOHH: Putative respiratory burst oxidase homolog protein H (Arabidopsis thaliana)
AUR62001862	0	Has Orthologs	Cluster 11623			Protein of unknown function
AUR62001863	0	Has Orthologs	Cluster 1844			SimilarPHOT1: Phototropin-1 (Arabidopsis thaliana)
AUR62001864	8	Has Orthologs	Cluster 5807			SimilarCHX3: Cation/H(+) antiporter 3 (Arabidopsis thaliana)
AUR62001865	0	Has Orthologs	Cluster 15488			Protein of unknown function
AUR62001866	0	Has Orthologs	Cluster 15839			SimilarAt2g24560: GDSL esterase/lipase At2g24560 (Arabidopsis thaliana)
AUR62001867	0	Has Orthologs	Cluster 3986			SimilarEXO70B1: Exocyst complex component EXO70B1 (Arabidopsis thaliana)
AUR62001868	3	Has Orthologs	Cluster 5808			SimilarPRA1B4: PRA1 family protein B4 (Arabidopsis thaliana)
AUR62001869	0	Has Orthologs	Cluster 1673			SimilarSNX2B: Sorting nexin 2B (Arabidopsis thaliana)
AUR62001870	0	Has Orthologs	Cluster 5809			SimilarNaa25: N-alpha-acetyltransferase 25%2C NatB auxiliary subunit (Mus musculus)
AUR62001871	1	Has Orthologs	Cluster 1018	Root Up	Quinoa Overrepresented (with Beet)	SimilarLAC3: Laccase-3 (Arabidopsis thaliana)	9.82012	23.5274
AUR62001872	0	Has Orthologs	Cluster 5810			SimilarSWC6: SWR1 complex subunit 6 (Arabidopsis thaliana)
AUR62001873	0	Has Orthologs	Cluster 1541		Quinoa Overrepresented	Protein of unknown function
AUR62001874	7	Has Orthologs	Cluster 1541		Quinoa Overrepresented	Similarkha1: K(+)/H(+) antiporter 1 (Schizosaccharomyces pombe (strain 972 / ATCC 24843))
AUR62001875	15	Has Orthologs	Cluster 1541		Quinoa Overrepresented	SimilarCHX24: Cation/H(+) antiporter 24 (Arabidopsis thaliana)
AUR62001876	7	Has Orthologs	Cluster 1541		Quinoa Overrepresented	SimilarCHX12: Cation/H(+) antiporter 12 (Arabidopsis thaliana)
AUR62001877	0	Singleton	N/A	Shoot Up		SimilarAt1g18480: Uncharacterized protein At1g18480 (Arabidopsis thaliana)			5.62693	10.2424
AUR62001878	0	Has Orthologs	Cluster 4223			SimilarMCAT: Malonyl-CoA-acyl carrier protein transacylase%2C mitochondrial (Homo sapiens)
AUR62001879	0	Has Orthologs	Cluster 5811			Protein of unknown function
AUR62001880	0	Has Orthologs	Cluster 1368	Root Down		SimilarChlorophyll a-b binding protein%2C chloroplastic (Spinacia oleracea)	305.622	85.9669
AUR62001881	0	Has Orthologs	Cluster 5812			SimilarAt2g30170: Probable protein phosphatase 2C 26 (Arabidopsis thaliana)
AUR62001882	0	Has Orthologs	Cluster 1675			SimilarUGT87A2: UDP-glycosyltransferase 87A2 (Arabidopsis thaliana)
AUR62001883	0	Has Orthologs	Cluster 2647			SimilarRPL13AD: 60S ribosomal protein L13a-4 (Arabidopsis thaliana)
AUR62001884	0	Has Orthologs	Cluster 11624			Protein of unknown function
AUR62001885	0	Has Orthologs	Cluster 11625			SimilarLBD12: LOB domain-containing protein 12 (Arabidopsis thaliana)
AUR62001886	0	Has Orthologs	Cluster 5813			Protein of unknown function
AUR62001887	0	Has Orthologs	Cluster 5814			SimilarFLXL1: Protein FLX-like 1 (Arabidopsis thaliana)
AUR62001888	0	Has Orthologs	Cluster 11626			SimilarTAF15B: Transcription initiation factor TFIID subunit 15b (Arabidopsis thaliana)
AUR62001889	1	Has Orthologs	Cluster 5815			SimilarAt5g58480: Glucan endo-1%2C3-beta-glucosidase 9 (Arabidopsis thaliana)
AUR62001890	0	Has Orthologs	Cluster 5816			SimilarWRAP73: WD repeat-containing protein WRAP73 (Homo sapiens)
AUR62001891	0	Has Orthologs	Cluster 1675	Root Down; Shoot Down		SimilarUGT87A2: UDP-glycosyltransferase 87A2 (Arabidopsis thaliana)	6.87826	1.0904	4.1686	0.376682
AUR62001892	1	Has Orthologs	Cluster 5817			SimilarTIM22-1: Mitochondrial import inner membrane translocase subunit TIM22-1 (Arabidopsis thaliana)
AUR62001893	0	Has Orthologs	Cluster 5818			SimilarCCR1: Cinnamoyl-CoA reductase 1 (Arabidopsis thaliana)
AUR62001894	0	Has Orthologs	Cluster 2516	Shoot Up		SimilarIFI30: Gamma-interferon-inducible lysosomal thiol reductase (Bos taurus)			1.26265	5.43926
AUR62001895	0	Singleton	N/A			Protein of unknown function
AUR62001896	0	Has Orthologs	Cluster 4224		Quinoa Overrepresented	Similartif211: Eukaryotic translation initiation factor 2 subunit alpha (Schizosaccharomyces pombe (strain 972 / ATCC 24843))
AUR62001897	0	Singleton	N/A			SimilarLSH6: Protein LIGHT-DEPENDENT SHORT HYPOCOTYLS 6 (Arabidopsis thaliana)
AUR62001898	0	Singleton	N/A			SimilarERF010: Ethylene-responsive transcription factor ERF010 (Arabidopsis thaliana)
AUR62001899	0	Has Orthologs	Cluster 5819			SimilarCBSX1: CBS domain-containing protein CBSX1%2C chloroplastic (Arabidopsis thaliana)
AUR62001900	0	Has Orthologs	Cluster 2123		Quinoa Overrepresented	Protein of unknown function
AUR62001901	0	Has Orthologs	Cluster 5820	Shoot Up		SimilarAP2: Floral homeotic protein APETALA 2 (Arabidopsis thaliana)			6.90184	11.9624
AUR62001902	0	Has Orthologs	Cluster 5821			SimilarOTUD3: OTU domain-containing protein 3 (Homo sapiens)
AUR62001903	0	Has Orthologs	Cluster 5822	Shoot Down		SimilarFPP7: Filament-like plant protein 7 (Arabidopsis thaliana)			14.9067	5.74268
AUR62001904	0	Has Orthologs	Cluster 1089		Quinoa Overrepresented	SimilarRetrovirus-related Pol polyprotein from transposon TNT 1-94 (Nicotiana tabacum)
AUR62001905	0	Has Orthologs	Cluster 5823			Protein of unknown function
AUR62001906	0	Has Orthologs	Cluster 4017			Protein of unknown function
AUR62001907	0	Quinoa Specific	Cluster 16250		Quinoa Overrepresented	Protein of unknown function
AUR62001908	0	Has Orthologs	Cluster 5110			SimilarZFP3: Zinc finger protein 3 (Arabidopsis thaliana)
AUR62001909	0	Has Orthologs	Cluster 5824			SimilarAt5g67130: PI-PLC X domain-containing protein At5g67130 (Arabidopsis thaliana)
AUR62001910	0	Has Orthologs	Cluster 5825			SimilarAt5g67140: F-box protein At5g67140 (Arabidopsis thaliana)
AUR62001911	0	Has Orthologs	Cluster 14553	Shoot Down	Quinoa Overrepresented	SimilarCCOAOMT1: Caffeoyl-CoA O-methyltransferase 1 (Populus trichocarpa)			25.1136	10.5947
AUR62001912	0	Singleton	N/A			Protein of unknown function
AUR62001913	0	Has Orthologs	Cluster 5826			SimilarSPT: Transcription factor SPATULA (Arabidopsis thaliana)
AUR62001914	0	Has Orthologs	Cluster 5827			SimilarNAPRT2: Nicotinate phosphoribosyltransferase 2 (Arabidopsis thaliana)
AUR62001915	0	Has Orthologs	Cluster 5828			SimilarOs01g0868300: DNA polymerase alpha catalytic subunit (Oryza sativa subsp. japonica)
AUR62001916	1	Has Orthologs	Cluster 1476			SimilarAt1g01540: Probable serine/threonine-protein kinase At1g01540 (Arabidopsis thaliana)
AUR62001917	1	Has Orthologs	Cluster 5829	Shoot Down		SimilarARB_08043: Uncharacterized secreted protein ARB_08043 (Arthroderma benhamiae (strain ATCC MYA-4681 / CBS 112371))			4.1323	1.71672
AUR62001918	0	Has Orthologs	Cluster 4225			Protein of unknown function
AUR62001919	0	Has Orthologs	Cluster 5830			SimilarmkkA: Mitogen-activated protein kinase kinase kinase A (Dictyostelium discoideum)
AUR62001920	0	Singleton	N/A			Protein of unknown function
AUR62001921	1	Has Orthologs	Cluster 11627			SimilarGXM2: Glucuronoxylan 4-O-methyltransferase 2 (Arabidopsis thaliana)
AUR62001922	0	Has Orthologs	Cluster 14267			SimilarRALFL34: Protein RALF-like 34 (Arabidopsis thaliana)
AUR62001923	1	Has Orthologs	Cluster 2910			SimilarLipase (Rhizomucor miehei)
AUR62001924	0	Has Orthologs	Cluster 5831			SimilarRNP1: Heterogeneous nuclear ribonucleoprotein 1 (Arabidopsis thaliana)
AUR62001925	0	Has Orthologs	Cluster 5832	Shoot Up		Protein of unknown function			10.3107	24.0667
AUR62001926	0	Has Orthologs	Cluster 5833			SimilarABA2: Zeaxanthin epoxidase%2C chloroplastic (Nicotiana plumbaginifolia)
AUR62001927	0	Has Orthologs	Cluster 5834			Protein of unknown function
AUR62001928	0	Has Orthologs	Cluster 5835			SimilarCLASRP: CLK4-associating serine/arginine rich protein (Homo sapiens)
AUR62001929	0	Has Orthologs	Cluster 14268			Protein of unknown function
AUR62001930	0	Has Orthologs	Cluster 5836	Shoot Down		SimilarHSF24: Heat shock factor protein HSF24 (Solanum peruvianum)			10.6804	4.61671
AUR62001931	0	Singleton	N/A			SimilarrccR: Red chlorophyll catabolite reductase (Fragment) (Hordeum vulgare)
AUR62001932	0	Has Orthologs	Cluster 1275	Shoot Down		SimilarMET2A: DNA (cytosine-5)-methyltransferase 1 (Zea mays)			9.41878	6.44579
AUR62001933	0	Singleton	N/A			SimilarCYP707A4: Abscisic acid 8'-hydroxylase 4 (Arabidopsis thaliana)
AUR62001934	0	Has Orthologs	Cluster 2517			SimilarPCMP-E88: Pentatricopeptide repeat-containing protein At3g09040%2C mitochondrial (Arabidopsis thaliana)
AUR62001935	0	Quinoa Specific	Cluster 16251		Quinoa Overrepresented	SimilarERF117: Ethylene-responsive transcription factor ERF117 (Arabidopsis thaliana)
AUR62001936	0	Has Orthologs	Cluster 2794			SimilarERF114: Ethylene-responsive transcription factor ERF114 (Arabidopsis thaliana)
AUR62001937	0	Has Orthologs	Cluster 11628			Protein of unknown function
AUR62001938	11	Has Orthologs	Cluster 5837			SimilarDTX51: Protein DETOXIFICATION 51 (Arabidopsis thaliana)
AUR62001939	1	Has Orthologs	Cluster 11629			SimilarCNR1: Cell number regulator 1 (Zea mays)
AUR62001940	0	Has Orthologs	Cluster 5838			Protein of unknown function
AUR62001941	0	Has Orthologs	Cluster 2518			SimilarOs01g0234100: B3 domain-containing protein Os01g0234100 (Oryza sativa subsp. japonica)
AUR62001942	6	Has Orthologs	Cluster 5839			SimilarAt3g27390: Uncharacterized membrane protein At3g27390 (Arabidopsis thaliana)
AUR62001943	0	Singleton	N/A			Protein of unknown function
AUR62001944	0	Has Orthologs	Cluster 4226		Quinoa Overrepresented	Protein of unknown function
AUR62001945	0	Has Orthologs	Cluster 14269			SimilarMAP1D: Methionine aminopeptidase 1D%2C chloroplastic/mitochondrial (Arabidopsis thaliana)
AUR62001946	0	Has Orthologs	Cluster 2298			SimilarPCMP-E47: Pentatricopeptide repeat-containing protein At2g03380%2C mitochondrial (Arabidopsis thaliana)
AUR62001947	0	Has Orthologs	Cluster 2298			Protein of unknown function
AUR62001948	0	Has Orthologs	Cluster 4227		Quinoa Overrepresented	SimilarPLP2: Patatin-like protein 2 (Oryza sativa subsp. japonica)
AUR62001949	0	Singleton	N/A			SimilarPLP1: Patatin-like protein 1 (Arabidopsis thaliana)
AUR62001950	1	Has Orthologs	Cluster 5840			Protein of unknown function
AUR62001951	0	Has Orthologs	Cluster 5841			Protein of unknown function
AUR62001952	0	Has Orthologs	Cluster 5842			SimilarKiaa0922: Transmembrane protein 131-like (Mus musculus)
AUR62001953	0	Has Orthologs	Cluster 3790	Shoot Up		Protein of unknown function			8.275	13.1155
AUR62001954	0	Has Orthologs	Cluster 11308	Shoot Down		Protein of unknown function			23.4469	16.1298
AUR62001955	0	Has Orthologs	Cluster 5843			SimilarOs10g0391300: Zinc finger CCCH domain-containing protein 62 (Oryza sativa subsp. japonica)
AUR62001956	0	Has Orthologs	Cluster 1220		Quinoa Overrepresented	SimilarCRK5: CDPK-related kinase 5 (Arabidopsis thaliana)
AUR62001957	0	Has Orthologs	Cluster 14270			SimilarAGL17: Agamous-like MADS-box protein AGL17 (Arabidopsis thaliana)
AUR62001958	0	Has Orthologs	Cluster 5844			SimilarAt3g50520: Phosphoglycerate mutase-like protein 4 (Arabidopsis thaliana)
AUR62001959	0	Has Orthologs	Cluster 5845			SimilarCYP40: Peptidyl-prolyl cis-trans isomerase CYP40 (Arabidopsis thaliana)
AUR62001960	0	Has Orthologs	Cluster 5846			SimilarYDA: Mitogen-activated protein kinase kinase kinase YODA (Arabidopsis thaliana)
AUR62001961	0	Has Orthologs	Cluster 5847	Shoot Down		SimilarrplY: 50S ribosomal protein L25 (Erythrobacter litoralis (strain HTCC2594))			25.2652	14.7456
AUR62001962	0	Has Orthologs	Cluster 5848			SimilarLBD36: LOB domain-containing protein 36 (Arabidopsis thaliana)
AUR62001963	0	Has Orthologs	Cluster 4004			SimilarMsto1: Protein misato homolog 1 (Mus musculus)
AUR62001964	0	Has Orthologs	Cluster 5849			SimilarBOA: Transcription factor BOA (Arabidopsis thaliana)
AUR62001965	0	Has Orthologs	Cluster 5850			SimilarTRI1: Protein TRI1 (Saccharomyces cerevisiae (strain ATCC 204508 / S288c))
AUR62001966	0	Has Orthologs	Cluster 1242			SimilarSRK2I: Serine/threonine-protein kinase SRK2I (Arabidopsis thaliana)
AUR62001967	0	Has Orthologs	Cluster 4228			SimilarPCMP-H5: Pentatricopeptide repeat-containing protein At4g37170 (Arabidopsis thaliana)
AUR62001968	1	Has Orthologs	Cluster 1055	Root Down; Shoot Down	Quinoa Overrepresented (with Beet)	SimilarBp10: L-ascorbate oxidase homolog (Brassica napus)	99.2163	57.2998	37.3252	8.27388
AUR62001969	1	Has Orthologs	Cluster 1055		Quinoa Overrepresented (with Beet)	SimilarAAO: L-ascorbate oxidase (Cucurbita maxima)
AUR62001970	0	Singleton	N/A			SimilarDOF5.3: Dof zinc finger protein DOF5.3 (Arabidopsis thaliana)
AUR62001971	0	Has Orthologs	Cluster 14271			SimilarATG101: Autophagy-related protein 101 (Arabidopsis thaliana)
AUR62001972	0	Has Orthologs	Cluster 4229		Quinoa Overrepresented	SimilarMES10: Methylesterase 10 (Arabidopsis thaliana)
AUR62001973	0	Singleton	N/A			Protein of unknown function
AUR62001974	0	Singleton	N/A			Protein of unknown function
AUR62001975	0	Singleton	N/A			SimilarNUP58: Nuclear pore complex protein NUP58 (Arabidopsis thaliana)
AUR62001976	0	Singleton	N/A			SimilarDOF5.8: Dof zinc finger protein DOF5.8 (Arabidopsis thaliana)
AUR62001977	0	Has Orthologs	Cluster 5851	Shoot Down		SimilarAt2g23540: GDSL esterase/lipase At2g23540 (Arabidopsis thaliana)			4.25624	0.592194
AUR62001978	0	Has Orthologs	Cluster 3791			SimilarCDCA7L: Cell division cycle-associated 7-like protein (Homo sapiens)
AUR62001979	0	Has Orthologs	Cluster 5852			SimilarptrB: Protease 2 (Moraxella lacunata)
AUR62001980	0	Has Orthologs	Cluster 1021		Quinoa Overrepresented	SimilarAtMg00810: Uncharacterized mitochondrial protein AtMg00810 (Arabidopsis thaliana)
AUR62001981	0	Has Orthologs	Cluster 5853			SimilarMOCOS: Molybdenum cofactor sulfurase (Bos taurus)
AUR62001982	0	Has Orthologs	Cluster 2519		Quinoa Overrepresented	Similarcsd: Probable cysteine desulfurase (Bacillus halodurans (strain ATCC BAA-125 / DSM 18197 / FERM 7344 / JCM 9153 / C-125))
AUR62001983	6	Has Orthologs	Cluster 1208			SimilarABCG11: ABC transporter G family member 11 (Arabidopsis thaliana)
AUR62001984	2	Singleton	N/A			SimilarPABN2: Polyadenylate-binding protein 2 (Arabidopsis thaliana)
AUR62001985	2	Has Orthologs	Cluster 14272			Protein of unknown function
AUR62001986	0	Has Orthologs	Cluster 5854			Protein of unknown function
AUR62001987	0	Has Orthologs	Cluster 5855			SimilarFBW2: F-box protein FBW2 (Arabidopsis thaliana)
AUR62001988	0	Has Orthologs	Cluster 5856			SimilarAt4g39970: Haloacid dehalogenase-like hydrolase domain-containing protein At4g39970 (Arabidopsis thaliana)
AUR62001989	0	Singleton	N/A			Protein of unknown function
AUR62001990	0	Has Orthologs	Cluster 1139		Quinoa Overrepresented (with Beet)	SimilarUGT85A24: 7-deoxyloganetin glucosyltransferase (Gardenia jasminoides)
AUR62001991	1	Has Orthologs	Cluster 1408			SimilarQUA2: Probable pectin methyltransferase QUA2 (Arabidopsis thaliana)
AUR62001992	0	Has Orthologs	Cluster 5857			SimilarABHD6: Monoacylglycerol lipase ABHD6 (Homo sapiens)
AUR62001993	0	Has Orthologs	Cluster 1065	Shoot Down		SimilarAt5g10290: Probable LRR receptor-like serine/threonine-protein kinase At5g10290 (Arabidopsis thaliana)			4.14299	2.25151
AUR62001994	0	Has Orthologs	Cluster 3835			Protein of unknown function
AUR62001995	0	Has Orthologs	Cluster 15544			Protein of unknown function
AUR62001996	0	Has Orthologs	Cluster 5858			SimilarSTOP1: Protein SENSITIVE TO PROTON RHIZOTOXICITY 1 (Arabidopsis thaliana)
AUR62001997	0	Has Orthologs	Cluster 2414			SimilarPYRE-F: Uridine 5'-monophosphate synthase (Arabidopsis thaliana)
AUR62001998	0	Has Orthologs	Cluster 5859			SimilarMYB39: Transcription factor MYB39 (Arabidopsis thaliana)
AUR62001999	0	Has Orthologs	Cluster 5860			SimilarRPL29: 50S ribosomal protein L29%2C chloroplastic (Arabidopsis thaliana)
[truncated: 42,777 more rows]
