# Supplementary material for: Identification of Putative Transmembrane Proteins Involved in Salinity Tolerance in Chenopodium quinoa by Integrating Physiological Data, RNAseq, and SNP Analyses
Source: Front Plant Sci. 2017 Jun 21;8:1023. doi: 10.3389/fpls.2017.01023 (PMC5478719; doi:10.3389/fpls.2017.01023)
Supplement: Supplementary file 2 [file DataSheet2.XLSX]

## Sheet: Sheet1
Scaffold	SNP Scaffold Position	Gene	Annotated Function
Located in exonic coding regions
4340	5692	AUR62043583	Protein of unknown function
	5702	AUR62043583
	5881	AUR62043583
	5894	AUR62043583
	6030	AUR62043583
	6035	AUR62043583
Located in intronic coding regions
1000	19908142	AUR62003102	SimilarUPS2: Ureide permease 2 (Arabidopsis thaliana)
	19908875	AUR62003102
	19909899	AUR62003102
	19910013	AUR62003102
	19911259	AUR62003102
	19918252	AUR62003102
1000	22181540	AUR62003279	Similar to SLC47A2: Multidrug and toxin extrusion protein 2 (Homo sapiens)
	22184226	AUR62003279
	22184866	AUR62003279
	22186852	AUR62003279
	22186857	AUR62003279
1001	1153310	AUR62006000	Protein of unknown function
1001	5921896	AUR62006322	Protein of unknown function
	5927235	AUR62006322
1229	156958	AUR62037262	SimilarmdtK: Multidrug resistance protein MdtK (Edwardsiella ictaluri (strain 93-146))
1257	4823669	AUR62010410	Similar to DTX46: Protein DETOXIFICATION 46%2C chloroplastic (Arabidopsis thaliana)
1319	1259722	AUR62034957	SimilarAAP6: Amino acid permease 6 (Arabidopsis thaliana)
	1260957	AUR62034957
	1260958	AUR62034957
	1263694	AUR62034957
1352	1812816	AUR62023389	Similar to RPN2: Dolichyl-diphosphooligosaccharide--protein glycosyltransferase subunit 2 (Arabidopsis thaliana)
1594	842540	AUR62039871	Similar to psbD: Photosystem II D2 protein (Lobularia maritima)
1606	1712166	AUR62023585	Similar to Sucrose transport protein (Spinacia oleracea)
1611	5065992	AUR62013556	Protein of unknown function
1710	4188656	AUR62008698	SimilarAt4g02290: Endoglucanase 17 (Arabidopsis thaliana)
1759	1897599	AUR62035861	Similar to CRK10: Cysteine-rich receptor-like protein kinase 10 (Arabidopsis thaliana)
	1897745	AUR62035861
	1898440	AUR62035861
	1898454	AUR62035861
	1898463	AUR62035861
	1898491	AUR62035861
	1898532	AUR62035861
	1898585	AUR62035861
	1899073	AUR62035861
	1899076	AUR62035861
1847	584384	AUR62037002	Protein of unknown function
1995	2142238	AUR62012231	Similar to EGY2: Probable zinc metalloprotease EGY2%2C chloroplastic (Arabidopsis thaliana)
	2142958	AUR62012231
2048	8253119	AUR62018245	Similar to At5g40670: Cystinosin homolog (Arabidopsis thaliana)
2088	1730124	AUR62000160	Similar to LHT1: Lysine histidine transporter 1 (Arabidopsis thaliana)
	1730179	AUR62000160
2123	1140813	AUR62034113	Similar to ZIF1: Protein ZINC INDUCED FACILITATOR 1 (Arabidopsis thaliana)
2187	2619461	AUR62023817	Similar to WAK1: Wall-associated receptor kinase 1 (Arabidopsis thaliana)
2193	323934	AUR62035587	Similar to YSL2: Metal-nicotianamine transporter YSL2 (Arabidopsis thaliana)
	324000	AUR62035587
2283	83512	AUR62043781	Similar to CER1: Protein ECERIFERUM 1 (Arabidopsis thaliana)
2715	4668952	AUR62012840	Similar to OPT3: Oligopeptide transporter 3 (Arabidopsis thaliana)
2716	3891766	AUR62001384	Similar to CYP51G1: Sterol 14-demethylase (Arabidopsis thaliana)
2773	1096314	AUR62025427	Similar to DTX19: Protein DETOXIFICATION 19 (Arabidopsis thaliana)
	1098680	AUR62025427
2896	519144	AUR62033236	Similar to PMA4: Plasma membrane ATPase 4 (Nicotiana plumbaginifolia)
2924	2076829	AUR62027326	Similar to WAKL14: Wall-associated receptor kinase-like 14 (Arabidopsis thaliana)
2924	434202	AUR62027193	Similar to NRAMP5: Metal transporter Nramp5 (Oryza sativa subsp. japonica)
2939	2208626	AUR62029358	Similar to LECRK91: L-type lectin-domain containing receptor kinase IX.1 (Arabidopsis thaliana)
3333	1469924	AUR62011415	Protein of unknown function
3422	3625754	AUR62008361	Similar to QKY: Protein QUIRKY (Arabidopsis thaliana)
3691	2164100	AUR62035968	Similar to ACD6: Protein ACCELERATED CELL DEATH 6 (Arabidopsis thaliana)
	2166754	AUR62035968
	2171765	AUR62035968
	2172759	AUR62035968
	2175090	AUR62035968
3966	911131	AUR62020606	Similar to PMA4: Plasma membrane ATPase 4 (Nicotiana plumbaginifolia)
4003	188128	AUR62043340	Similar to At1g06890: Uncharacterized membrane protein At1g06890 (Arabidopsis thaliana)
	188456	AUR62043340
	194612	AUR62043340
4164	178768	AUR62040838	Similar to WAK2: Wall-associated receptor kinase 2 (Arabidopsis thaliana)
4250	6152043	AUR62004667	Similar to Sucrose transport protein (Spinacia oleracea)
4319	1115578	AUR62022094	Similar to PROT2: Proline transporter 2 (Arabidopsis thaliana)
	1116172	AUR62022094
	1116638	AUR62022094
	1116642	AUR62022094
	1117040	AUR62022094
	1117081	AUR62022094
	1117084	AUR62022094
4446	2715804	AUR62027397	Protein of unknown function
4480	5617665	AUR62002370	Similar to WAK1: Wall-associated receptor kinase 1 (Arabidopsis thaliana)
4480	7720164	AUR62002502	Similar to MLO15: MLO-like protein 15 (Arabidopsis thaliana)
Located in the 2 kb surrounding the coding region
1000	9749282	AUR62002768	SimilarDTX14: Protein DETOXIFICATION 14 (Arabidopsis thaliana)
	9749398	AUR62002768
	9749403	AUR62002768
	9756805	AUR62002768
1000	19905794	AUR62003102	SimilarUPS2: Ureide permease 2 (Arabidopsis thaliana)
	19905795	AUR62003102
1000	22177952	AUR62003279	Similar to SLC47A2: Multidrug and toxin extrusion protein 2 (Homo sapiens)
1000	22881306	AUR62003328	Similar to LECRKS5: Probable L-type lectin-domain containing receptor kinase S.5 (Arabidopsis thaliana)
	22881410	AUR62003328
	22887766	AUR62003328
	22890185	AUR62003328
1001	1149722	AUR62005999	Protein of unknown function
1001	2577080	AUR62006134	SimilarCNGC1: Cyclic nucleotide-gated ion channel 1 (Arabidopsis thaliana)
	2578287	AUR62006134
1001	5917739	AUR62006322	Protein of unknown function
	5919165	AUR62006322
	5920496	AUR62006322
	5930855	AUR62006322
1001	7205125	AUR62006395	Protein of unknown function
	7205132	AUR62006395
1186	8401601	AUR62035545	SimilarABCB11: ABC transporter B family member 11 (Arabidopsis thaliana)
1214	1128703	AUR62005358	Protein of unknown function
1229	152006	AUR62037262	SimilarmdtK: Multidrug resistance protein MdtK (Edwardsiella ictaluri (strain 93-146))
	159836	AUR62037262
1251	1623599	AUR62032632	SimilarCLC-B: Chloride channel protein CLC-b (Arabidopsis thaliana)
1257	4814201	AUR62010410	Similar to DTX46: Protein DETOXIFICATION 46%2C chloroplastic (Arabidopsis thaliana)
	4815712	AUR62010410
1319	1254003	AUR62034957	SimilarAAP6: Amino acid permease 6 (Arabidopsis thaliana)
	1254310	AUR62034957
	1254416	AUR62034957
	1268493	AUR62034957
1352	1363816	AUR62023343	SimilarNPF4.7: Protein NRT1/ PTR FAMILY 4.7 (Arabidopsis thaliana)
1352	1517645	AUR62023354	Similar to CER1: Protein ECERIFERUM 1 (Arabidopsis thaliana)
	1525603	AUR62023354
	1526985	AUR62023354
1516	2579348	AUR62024910	Similar to At4g32390: Probable sugar phosphate/phosphate translocator At4g32390 (Arabidopsis thaliana)
1516	2765481	AUR62024918	Similar to At1g06890: Uncharacterized membrane protein At1g06890 (Arabidopsis thaliana)
1566	1211074	AUR62014302	SimilarALA1: Phospholipid-transporting ATPase 1 (Arabidopsis thaliana)
	1211230	AUR62014302
	1211307	AUR62014302
	1211687	AUR62014302
1566	2905689	AUR62014421	Similar to FLS2: LRR receptor-like serine/threonine-protein kinase FLS2 (Arabidopsis thaliana)
1606	1722892	AUR62023585	Similar to Sucrose transport protein (Spinacia oleracea)
	1723999	AUR62023585
1606	828192	AUR62023509	Similar to CURT1A: Protein CURVATURE THYLAKOID 1A%2C chloroplastic (Arabidopsis thaliana)
	829717	AUR62023509
1611	5060062	AUR62013556	Protein of unknown function
1675	3435391	AUR62021759	Similar to NFD4: Protein NUCLEAR FUSION DEFECTIVE 4 (Arabidopsis thaliana)
1686	628334	AUR62037711	SimilarCNGC14: Probable cyclic nucleotide-gated ion channel 14 (Arabidopsis thaliana)
	634544	AUR62037711
	635935	AUR62037711
1710	4190674	AUR62008698	SimilarAt4g02290: Endoglucanase 17 (Arabidopsis thaliana)
1759	1888088	AUR62035861	Similar to CRK10: Cysteine-rich receptor-like protein kinase 10 (Arabidopsis thaliana)
	1888582	AUR62035861
	1888590	AUR62035861
	1888593	AUR62035861
	1890588	AUR62035861
1765	730495	AUR62033438	SimilarKCS11: 3-ketoacyl-CoA synthase 11 (Arabidopsis thaliana)
	731383	AUR62033438
	731658	AUR62033438
1776	1042652	AUR62033541	Similar to SMO1-1: Methylsterol monooxygenase 1-1 (Arabidopsis thaliana)
	1049618	AUR62033541
1810	385515	AUR62031871	Similar to TIP2-1: Aquaporin TIP2-1 (Arabidopsis thaliana)
	386475	AUR62031871
1846	690207	AUR62029127	Protein of unknown function
1847	581531	AUR62037002	Protein of unknown function
1862	2467451	AUR62022009	Similar to Ank3: Ankyrin-3 (Rattus norvegicus)
1862	873078	AUR62021863	Similar to NPF2.13: Protein NRT1/ PTR FAMILY 2.13 (Arabidopsis thaliana)
1895	103340	AUR62031750	Similar to LHT1: Lysine histidine transporter 1 (Arabidopsis thaliana)
	98244	AUR62031750
1971	3254554	AUR62007259	Similar to GLR2.7: Glutamate receptor 2.7 (Arabidopsis thaliana)
	3268986	AUR62007259
1971	4169449	AUR62007334	Similar to NPF5.6: Protein NRT1/ PTR FAMILY 5.6 (Arabidopsis thaliana)
1971	4944846	AUR62007406	Similar to NRAMP5: Metal transporter Nramp5 (Oryza sativa subsp. japonica)
	4945495	AUR62007406
1995	2138002	AUR62012231	Similar to EGY2: Probable zinc metalloprotease EGY2%2C chloroplastic (Arabidopsis thaliana)
1995	2138610	AUR62012231
1995	2151283	AUR62012231
2088	1740777	AUR62000160	Similar to LHT1: Lysine histidine transporter 1 (Arabidopsis thaliana)
2088	3506436	AUR62000335	Similar to WAKL16: Putative wall-associated receptor kinase-like 16 (Arabidopsis thaliana)
2123	1133041	AUR62034113	Similar to ZIF1: Protein ZINC INDUCED FACILITATOR 1 (Arabidopsis thaliana)
2127	1684640	AUR62019493	Protein of unknown function
	1687387	AUR62019493
	1687472	AUR62019493
2187	986982	AUR62023700	Similar to WAK2: Wall-associated receptor kinase 2 (Arabidopsis thaliana)
	994373	AUR62023700
2193	321670	AUR62035587	Similar to YSL2: Metal-nicotianamine transporter YSL2 (Arabidopsis thaliana)
2230	652206	AUR62038559	Protein of unknown function
2283	80802	AUR62043781	Similar to CER1: Protein ECERIFERUM 1 (Arabidopsis thaliana)
2314	234147	AUR62026994	Similar to NRAMP6: Metal transporter Nramp6 (Arabidopsis thaliana)
2370	921526	AUR62003453	Similar to WAKL2: Wall-associated receptor kinase-like 2 (Arabidopsis thaliana)
2715	2103587	AUR62012626	Similar to CRK10: Cysteine-rich receptor-like protein kinase 10 (Arabidopsis thaliana)
2715	4667058	AUR62012840	Similar to OPT3: Oligopeptide transporter 3 (Arabidopsis thaliana)
2773	3208219	AUR62025538	Similar to ABCG6: ABC transporter G family member 6 (Arabidopsis thaliana)
	3210363	AUR62025538
	3214022	AUR62025538
	3216574	AUR62025538
	3217341	AUR62025538
2862	2483747	AUR62021463	Similar to At1g67300: Probable plastidic glucose transporter 2 (Arabidopsis thaliana)
	2484385	AUR62021463
2924	2071933	AUR62027326	Similar to NRAMP5: Metal transporter Nramp5 (Oryza sativa subsp. japonica)
	2078112	AUR62027326
2939	2214332	AUR62029358	Similar to LECRK91: L-type lectin-domain containing receptor kinase IX.1 (Arabidopsis thaliana)
3086	2321591	AUR62017968	Similar to PAS2: Very-long-chain (3R)-3-hydroxyacyl-CoA dehydratase PASTICCINO 2 (Arabidopsis thaliana)
3298	1047692	AUR62026191	Protein of unknown function
3333	1462742	AUR62011415	Protein of unknown function
3429	4081232	AUR62006689	Similar to WAKL8: Wall-associated receptor kinase-like 8 (Arabidopsis thaliana)
	4087209	AUR62006689
3489	672599	AUR62017230	Similar to QKY: Protein QUIRKY (Arabidopsis thaliana)
3670	1078131	AUR62016689	Similar to EFR: LRR receptor-like serine/threonine-protein kinase EFR (Arabidopsis thaliana)
3674	288110	AUR62009063	Similar to PMA4: Plasma membrane ATPase 4 (Nicotiana plumbaginifolia)
3674	3061355	AUR62009245	Similar to secG: Ankyrin repeat%2C PH and SEC7 domain containing protein secG (Dictyostelium discoideum)
3792	857805	AUR62025983	Protein of unknown function
3820	11682709	AUR62005223	Similar to GLR2.6: Glutamate receptor 2.6 (Arabidopsis thaliana)
4164	175774	AUR62040838	Similar to WAK2: Wall-associated receptor kinase 2 (Arabidopsis thaliana)
	177313	AUR62040838
4250	5587990	AUR62004627	Similar to Sucrose transport protein (Spinacia oleracea)
	5588021	AUR62004627
	5588655	AUR62004627
	5588823	AUR62004627
	6146209	AUR62004667
	6148903	AUR62004667
4319	1111888	AUR62022094	Similar to PROT2: Proline transporter 2 (Arabidopsis thaliana)
	1111966	AUR62022094
	1112194	AUR62022094
	1121518	AUR62022094
	1122811	AUR62022094
4340	1612	AUR62043583	Protein of unknown function
	1629	AUR62043583
	1824	AUR62043583
	1832	AUR62043583
	1840	AUR62043583
	1861	AUR62043583
	1984	AUR62043583
	1990	AUR62043583
	2004	AUR62043583
	2939	AUR62043583
	2969	AUR62043583
	2981	AUR62043583
	2997	AUR62043583
	3028	AUR62043583
	2722309	AUR62027397
4480	2507232	AUR62002131	Similar to PHT1-4: Probable inorganic phosphate transporter 1-4 (Oryza sativa subsp. indica)
4480	4032376	AUR62002252	Similar to MEX1: Maltose excess protein 1%2C chloroplastic (Arabidopsis thaliana)
4480	5620545	AUR62002370	Similar to WAK1: Wall-associated receptor kinase 1 (Arabidopsis thaliana)
4480	7514034	AUR62002490	Similar to WAK2: Wall-associated receptor kinase 2 (Arabidopsis thaliana)
	7514863	AUR62002490
